# Supplementary material for: Increased antioxidative defense and reduced advanced glycation end-product formation by metabolic adaptation in non-small-cell-lung-cancer patients
Source: Nat Commun. 2025 Jun 3;16:5157. doi: 10.1038/s41467-025-60326-y (PMC12134105; doi:10.1038/s41467-025-60326-y)
Supplement: Supplementary file 7 — Supplementary Data 5 [file 41467_2025_60326_MOESM7_ESM.xlsx]

## Sheet: LIPID_METABOLISM
GO Term	Enrichment Map Name	GS_DESCR	GS_Type	Formatted name	Genes	GS_SIZE	p-value	Enrichment FDR q-value	NES
GO:0006629	GO:0006629	Lipid metabolic process	ENR	GO:0006629	ALDH1A2, CYP27A1, LPCAT3, FABP4, SFTPB, PDGFRB, PTPN13, LTA4H, LCAT, APOB, APOA1, TTR, PBX1, CAT, LRP1, PNPLA6, C3, MGLL, ESYT2, APOE, ACAT1, GPD1L, IVD, ACAA2, GC, MAPK3, NAAA, IDI2, ECHDC1, BDH2, ALDH1A1, ADH1B, GPC2, APOC1, LPCAT1, HPGD, CRYL1, ALOX5AP, FABP5, EPHX1, GPD1, MID1IP1, SLC27A3, CYP51A1, LIPA, FASN, PTPN11, SDC2, CLU, APOL1, PRKAA1, SERPINA6, APOA4, HSD17B11, PITPNA, ACAA1, AKR1B10…	108	3.35e-10	2.25e-08	0.764782
GO:0097006	GO:0097006	Regulation of plasma lipoprotein particle levels	ENR	GO:0097006	APOE, PRKACA, NPC2, APOC1, LPCAT3, APOC2, AP2A2, APOA4, CD36, EHD1, APOC4, AP2B1, MPO, APOM, LCAT, AGT, APOB, APOA1, LIPA, APOA2, APOC3	21	1.32e-09	7.96e-08	0.709909
GO:1901615	GO:1901615	Organic hydroxy compound metabolic process	ENR	GO:1901615	ALDH1A2, CYP27A1, RBP4, HAGH, CES1, CYB5R3, ALDH2, CYB5R1, MAOB, LCAT, APOB, APOA1, TTR, CAT, ALDH3A2, APOE, FDPS, SULT1A1, LSS, ACAA2, SULT1A4, GC, NAAA, ASAH1, IDI2, MECP2, QDPR, ALDH1A1, ADH1B, HSD17B4, ADH1C, PLCD1, DYSF, APOC1, PDXK, GPD1, CYP51A1, LIPA, MAOA, ACOT8, APOL1, PON1, NPC2, PRKAA1, ALOX15, ALDH3B1, APOA4, AKR7A2, ACAA1, AKR1B10, SNCA, CRYM, APOA2, ACSS2, SULT1A2	55	4.35e-09	2.36e-07	0.662709
GO:0006721	GO:0006721	Terpenoid metabolic process	ENR	GO:0006721	GPC2, ADH1C, ALDH1A2, RBP4, UGT1A7, APOC2, APOM, AGRN, APOB, APOA1, TTR, RARRES2, ALDH3A2, LRP1, SDC2, APOE, FDPS, HSPG2, LSS, APOA4, AKR1B10, ALDH1A1, APOA2, APOC3, ADH1B	25	1.24e-08	6.01e-07	0.622113
GO:0043691	GO:0043691	Reverse cholesterol transport	ENR	GO:0043691	APOE, LCAT, APOA1, CES1, APOA2, APOC2, APOC3, APOA4, CLU, APOM	10	1.36e-07	5.43e-06	0.52652
GO:0006869	GO:0006869	Lipid transport	ENR	GO:0006869	GULP1, RBP4, APOC1, ABCA8, LBP, CES1, FABP4, FABP3, APOC2, CD36, APOC4, APOM, FABP5, ANO6, SLC4A1, LCAT, ABCA3, MID1IP1, APOB, SERPINA5, SLC27A3, APOA1, APOD, CLU, ESYT2, APOL1, APOE, NPC2, ANXA1, APOA4, PITPNA, ACE, CAV1, APOA2, APOC3, SLC2A1	36	1.06e-06	3.54e-05	0.4451
GO:0016125	GO:0016125	Sterol metabolic process	ENR	GO:0016125	APOE, FDPS, PON1, CYP27A1, NPC2, APOC1, PRKAA1, CES1, CYB5R3, LSS, ACAA2, APOA4, CYB5R1, IDI2, LCAT, APOB, CYP51A1, APOA1, LIPA, CAT, APOA2, APOL1	22	2.46e-06	7.69e-05	0.411407
GO:0019216	GO:0019216	Regulation of lipid metabolic process	ENR	GO:0019216	CAPN2, EPHX2, APOC1, LPCAT1, HPGD, PANK2, CES1, SORBS1, PPP2R5A, UGT1A7, FABP3, APOC2, TGFB1, CD36, PDGFRB, FABP5, MID1IP1, APOB, CYP51A1, APOA1, F2, APOD, RARRES2, FASN, C3, APOE, FDPS, NPC2, PRKAA1, RGN, ANXA1, LSS, APOA4, ASAH1, CD81, AGT, CAV1, GIG25, PTK2, APOA2, WDR91, APOC3, CDC42, POR	44	3.46e-06	0.0001	0.4
GO:0016042	GO:0016042	Lipid catabolic process	ENR	GO:0016042	CYP27A1, PLCD1, CES1, FABP4, FABP3, APOC2, FABP5, APOB, LYPLA2, LIPA, ALDH3A2, LRP1, PNPLA6, ACOT8, MGLL, ABHD12, APOE, ACAT1, IVD, PAFAH1B1, ACAA2, APOA4, HSD17B11, NAAA, ASAH1, PLBD1, ACAA1, AKR1B10, ACADS, ECHDC1, BDH2, APOA2, APOC3, HSD17B4	34	5.66e-06	0.00016	0.379588
GO:1905952	GO:1905952	Regulation of lipid localization	ENR	GO:1905952	APOE, PON1, APOC1, CES1, FABP3, APOC2, PLIN3, APOA4, CD36, EHD1, APOC4, AGT, CAV1, APOB, APOA1, ANXA2, APOA2, LRP1, APOC3, C3, PTPN11, ACSL5	22	1.1e-05	0.0003	0.352288
GO:0015850	GO:0015850	Organic hydroxy compound transport	ENR	GO:0015850	APOE, NPC2, AQP1, RBP4, APOC1, CES1, APOC2, APOA4, CD36, APOM, LCAT, SNCA, MECP2, CAV1, APOB, APOA1, APOA2, AQP3, NISCH, APOC3, CLU	21	1.87e-05	0.00049	0.33098
GO:0010873	GO:0010873	Positive regulation of cholesterol esterification	ENR	GO:0010873	APOE, AGT, APOC1, APOA1, APOA2, APOA4	6	2.88e-05	0.00071	0.314874
GO:0060192	GO:0060192	Negative regulation of lipase activity	ENR	GO:0060192	APOC1, APOA1, ANXA1, APOA2, APOC3, ANXA8, POR	7	6.45e-05	0.0015	0.282391
GO:0006695	GO:0006695	Cholesterol biosynthetic process	ENR	GO:0006695	IDI2, FDPS, PRKAA1, CYP51A1, APOA1, CES1, CYB5R3, LSS, ACAA2, APOA4	10	7.72e-05	0.0017	0.276955
GO:0046464	GO:0046464	Acylglycerol catabolic process	ENR	GO:0046464	APOB, LYPLA2, FABP4, APOA2, FABP3, APOC3, MGLL, FABP5, ABHD12	9	0.0001	0.0022	0.265758
GO:0019218	GO:0019218	Regulation of steroid metabolic process	ENR	GO:0019218	APOE, FDPS, EPHX2, APOC1, PRKAA1, PANK2, CES1, LSS, APOA4, ASAH1, AGT, APOB, CYP51A1, APOA1, FASN, APOA2, POR	17	0.00016	0.0032	0.249485
GO:0034382	GO:0034382	Chylomicron remnant clearance	ENR	GO:0034382	APOE, APOC1, APOB, APOC2, APOC3	5	0.00017	0.0035	0.245593
GO:0060191	GO:0060191	Regulation of lipase activity	ENR	GO:0060191	APOC1, ANXA1, APOC2, ANXA8, APOA4, GNAQ, PDGFRB, HRAS, SNCA, AGT, APOA1, APOA2, LRP1, APOC3, POR	15	0.00018	0.0037	0.24318
GO:0019395	GO:0019395	Fatty acid oxidation	ENR	GO:0019395	ACAT1, PRKAA1, IVD, ALOX15, ACAA2, ACAA1, ACADS, ECHDC1, BDH2, ALDH3A2, ACOT8, POR, HSD17B4	13	0.00026	0.005	0.230103
GO:0055088	GO:0055088	Lipid homeostasis	ENR	GO:0055088	APOE, EPHX2, NPC2, PRKAA1, CES1, FABP4, FABP3, APOC2, APOA4, EHD1, APOC4, APOM, LCAT, CAV1, APOB, APOA1, APOA2, APOC3	18	0.00032	0.006	0.222185
GO:0034383	GO:0034383	Low-density lipoprotein particle clearance	ENR	GO:0034383	NPC2, APOB, LIPA, AP2A2, CD36, EHD1, AP2B1	7	0.00037	0.0068	0.216749
GO:0010901	GO:0010901	Regulation of very-low-density lipoprotein particle remodeling	ENR	GO:0010901	APOA1, APOA2, APOC2, APOC3	4	0.00043	0.0076	0.211919
GO:0046486	GO:0046486	Glycerolipid metabolic process	ENR	GO:0046486	APOC1, LPCAT1, LPCAT3, FABP4, FABP3, PDGFRB, PTPN13, FABP5, GPD1, SERINC1, LCAT, APOB, LYPLA2, APOA1, CAT, PNPLA6, PTPN11, MTM1, MGLL, ABHD12, APOE, PIP4K2A, PON1, RAB14, GPD1L, ALOX15, PAFAH1B1, APOA4, PLBD1, MECP2, CAV1, APOA2, APOC3, DPM3	34	0.00044	0.0077	0.211351
GO:0019217	GO:0019217	Regulation of fatty acid metabolic process	ENR	GO:0019217	APOC1, RGN, HPGD, PANK2, ANXA1, UGT1A7, FABP3, APOC2, APOA4, FABP5, MID1IP1, CAV1, APOA1, APOC3	14	0.00066	0.0109	0.196257
GO:0032376	GO:0032376	Positive regulation of cholesterol transport	ENR	GO:0032376	APOE, PON1, CAV1, APOA1, ANXA2, CES1, LRP1	7	0.00081	0.013	0.188606
GO:0090207	GO:0090207	Regulation of triglyceride metabolic process	ENR	GO:0090207	APOE, RGN, APOA1, PANK2, APOC2, APOC3, C3, APOA4	8	0.00093	0.0145	0.183863
GO:0045723	GO:0045723	Positive regulation of fatty acid biosynthetic process	ENR	GO:0045723	MID1IP1, RGN, APOA1, ANXA1, APOC2, APOA4	6	0.0011	0.0163	0.178781
GO:0015909	GO:0015909	Long-chain fatty acid transport	ENR	GO:0015909	APOE, ACE, MID1IP1, SLC27A3, ANXA1, FABP4, FABP3, CD36, SLC2A1, FABP5	10	0.0011	0.0169	0.177211
GO:0042157	GO:0042157	Lipoprotein metabolic process	ENR	GO:0042157	APOE, APOC1, APOA4, APOM, LCAT, APOB, LYPLA2, APOA1, APOA2, LRP1, APOC3, DPM3, PPM1A, APOL1, ABHD12	15	0.0012	0.0182	0.173993
GO:0062012	GO:0062012	Regulation of small molecule metabolic process	ENR	GO:0062012	EPHX2, APOC1, FAM3C, PSMD9, HPGD, PANK2, CES1, SORBS1, UGT1A7, FABP3, APOC2, TGFB1, FABP5, SLC4A1, GPD1, MID1IP1, APOB, STAT3, CYP51A1, APOA1, PSMF1, FASN, FBP1, APOE, FDPS, PRKAA1, RGN, ANXA1, LSS, ATP2B4, APOA4, NLN, IGFBP3, SNCA, CAV1, APOC3, POR	37	0.0013	0.0197	0.170553
GO:0001676	GO:0001676	Long-chain fatty acid metabolic process	ENR	GO:0001676	EPHX2, ALOX15, HPGD, MAPK3, ACAA1, EPHX1, LTA4H, PTGIS, QKI, SLC27A3, ACOT8, MGLL, ACSL5, HSD17B4	14	0.0015	0.0219	0.165956
GO:0150172	GO:0150172	Regulation of phosphatidylcholine metabolic process	ENR	GO:0150172	CAPN2, APOC1, LPCAT1, FABP3	4	0.0015	0.022	0.165758
GO:0034374	GO:0034374	Low-density lipoprotein particle remodeling	ENR	GO:0034374	APOE, AGT, APOB, APOA2, MPO	5	0.0016	0.0231	0.163639
GO:0045540	GO:0045540	Regulation of cholesterol biosynthetic process	ENR	GO:0045540	APOE, FDPS, APOB, PRKAA1, CYP51A1, FASN, LSS, POR	8	0.0019	0.026	0.158503
GO:0046470	GO:0046470	Phosphatidylcholine metabolic process	ENR	GO:0046470	PON1, LCAT, MECP2, LPCAT1, APOA1, LPCAT3, APOA2, PNPLA6, APOA4, PLBD1, FABP5	11	0.0021	0.029	0.15376
GO:0010884	GO:0010884	Positive regulation of lipid storage	ENR	GO:0010884	APOB, PLIN3, C3, CD36, EHD1, APOC4	6	0.0023	0.0306	0.151428
GO:0008610	GO:0008610	Lipid biosynthetic process	ENR	GO:0008610	ALDH1A2, CYP27A1, EPHX2, LPCAT1, HPGD, LPCAT3, CES1, CYB5R3, PTPN13, ALOX5AP, FABP5, CYB5R1, LTA4H, GPD1, SERINC1, LCAT, CYP51A1, APOA1, PBX1, FASN, ALDH3A2, MTM1, ACOT8, MGLL, ACSL5, FDPS, PIP4K2A, RAB14, GPD1L, PRKAA1, ALOX15, LSS, ALDH3B1, ACAA2, APOA4, HSD17B11, ASAH1, PTGIS, IDI2, QKI, APOA2, ACSS2, DPM3, HSD17B4	44	0.0026	0.0341	0.146725
GO:0060620	GO:0060620	Regulation of cholesterol import	ENR	GO:0060620	APOA2, LRP1, APOC3	3	0.0028	0.0358	0.144612
GO:1904478	GO:1904478	Regulation of intestinal absorption	ENR	GO:1904478	EPB41, APOA1, APOA2, APOA4	4	0.0028	0.0361	0.144249
GO:1901568	GO:1901568	Fatty acid derivative metabolic process	ENR	GO:1901568	PON1, ACAT1, EPHX2, ALOX15, HPGD, MAPK3, ALOX5AP, EPHX1, LTA4H, PTGIS, BDH2, LYPLA2, FASN, ACSS3, MGLL, ACSL5, HSD17B4	17	0.003	0.0381	0.141908
GO:0050994	GO:0050994	Regulation of lipid catabolic process	ENR	GO:0050994	APOC1, PRKAA1, APOA1, HPGD, RARRES2, APOA2, APOC2, APOC3, APOA4	9	0.0037	0.0446	0.135067
GO:0071404	GO:0071404	Cellular response to low-density lipoprotein particle stimulus	ENR	GO:0071404	CD81, CDH13, CES1, CD36, CD9	5	0.0038	0.0456	0.134104

## Sheet: TRANSPORT
GO Term	Enrichment Map Name	GS_DESCR	GS_Type	Formatted name	Genes	GS_SIZE	p-value	Enrichment FDR q-value	NES
GO:0051050	GO:0051050	Positive regulation of transport	ENR	GO:0051050	UNC13D, HLA-F, IPO5, TGFB1, PDGFRB, VTN, C4A, APOA1, LRP1, C3, SNX4, APOE, GLUD1, ACTN4, LGALS3, GPD1L, GJA1, CA2, EHD2, CD81, APPL1, PRKACA, CD34, ANK3, AQP1, STOM, GNAI2, LRRK2, VPS35, FGB, FGA, C2, F2, RAB8B, VAMP2, PTPN11, CLU, STX4, PRKAA1, OCLN, EHD3, HLA-DRB1, HIP1, MSN, ITLN1, FGG, DMD, SNCA, AGT, CAV1, ANXA2, APOA2, PPM1A, DYNC1H1, GSTO1, ANK2, ACTB, RBP4, MYO1C, MYH10, CES1, FABP3, FLOT…	105	1.93e-15	2.33e-13	1.26326
GO:0006897	GO:0006897	Endocytosis	ENR	GO:0006897	ANK2, ACTB, ATP6V1H, EHD4, CAV2, VTN, DNM3, APOB, CD5L, APOA1, LRP1, FCN1, ESYT2, SFTPD, APOE, HSPG2, AGER, SNX5, SNX2, MAPK3, PACSIN2, CD9, EHD2, DNM2, CD81, PICALM, CFI, AMBP, HPX, HOOK2, BIN2, COLEC12, CDC42, FCN3, SAA1, GULP1, CALCRL, AHSG, NOSTRIN, CD36, PRG4, HRAS, LRRK2, ARRB1, MRC2, DPYSL2, VAMP2, PACSIN3, HPR, APOL1, TRIP10, EPN2, MRC1, HBA1, ANKFY1, EHD3, AP2A2, EHD1, LRRC16A, AP2B1, HB…	66	3.27e-15	3.85e-13	1.24145
GO:0060627	GO:0060627	Regulation of vesicle-mediated transport	ENR	GO:0060627	RALA, UNC13D, HLA-F, EHD4, FLOT1, VTN, C4A, DNM3, PRTN3, APOA1, LRP1, RAP1A, NRP1, C3, SFTPD, SNX4, APOE, STXBP1, ACTN4, LGALS3, ANXA1, CDH13, RDX, MAPK3, RALB, PACSIN2, EHD2, DNM2, PICALM, PDCD6IP, ROCK1, APPL1, CDC42, TF, DYSF, APOC1, GNAI2, AHSG, NUMB, APOC2, CD36, ANO6, LRRK2, ARRB1, STXBP2, C4B, FGB, FGA, CLASP2, C2, C4BPA, RAB8B, VAMP2, CLU, PACSIN3, ACTN2, STX4, PRKAA1, ALOX15, STXBP6, ANK…	72	1.72e-13	1.71e-11	1.0767
GO:0030100	GO:0030100	Regulation of endocytosis	ENR	GO:0030100	TF, APOC1, NUMB, EHD4, APOC2, CD36, FLOT1, VTN, ANO6, LRRK2, ARRB1, LRP1, C3, CLU, PACSIN3, APOE, ACTN4, LGALS3, ALOX15, ANKFY1, CDH13, AP2B1, PACSIN2, HIP1, DNM2, SNCA, CAV1, PICALM, ANXA2, APOC3, ROCK1, APPL1, CDC42	33	9.04e-09	4.61e-07	0.63363
GO:0006898	GO:0006898	Receptor-mediated endocytosis	ENR	GO:0006898	CALCRL, CD36, CAV2, ARRB1, DNM3, APOB, APOA1, LRP1, HPR, SFTPD, APOL1, APOE, HSPG2, MRC1, HBA1, AP2A2, AP2B1, HBB, CD9, HIP1, DNM2, CD81, SNCA, CAV1, PICALM, AMBP, HPX, HP, COLEC12, SAA1	30	3.3e-08	1.52e-06	0.581816
GO:0006909	GO:0006909	Phagocytosis	ENR	GO:0006909	ACTB, GULP1, UNC13D, MYO1C, LBP, CORO1C, ANXA11, CD36, TGM2, C4B, PRTN3, LRP1, MYH2, CD93, FCN1, RAB14, PECAM1, ALOX15, ANXA1, YES1, SRPX, ELANE, MAPK3, DNM2, RHOG, ANXA3, PTK2, BIN2, COLEC12, CDC42, FCN3	31	1.45e-07	5.73e-06	0.524185
GO:0050764	GO:0050764	Regulation of phagocytosis	ENR	GO:0050764	DYSF, AHSG, ALOX15, CD36, C4A, ANO6, DNM2, C4B, PRTN3, APOA1, C2, APOA2, LRP1, C4BPA, RAP1A, C3, C4BPB, APPL1, SFTPD	19	4.96e-07	1.77e-05	0.475203
GO:1904375	GO:1904375	Regulation of protein localization to cell periphery	ENR	GO:1904375	STX4, EPB41, ACTB, LGALS3, DAG1, ADAM10, SORBS1, PPP2R5A, EPB41L2, NUMB, TGFB1, ATP2B4, HRAS, GNAI1, ITGA3, STX7, RHOG, PICALM, LRP1, RAP1A, APPL1, SPTBN1	22	7.12e-07	2.45e-05	0.461083
GO:0051051	GO:0051051	Negative regulation of transport	ENR	GO:0051051	ANK3, DYSF, CRYAB, APOC1, HLA-F, GNAI2, PSMD9, GDI1, APOC2, CD36, FABP5, PPM1F, LRRK2, MAOB, VPS35, PRTN3, CYP51A1, APOD, ICAM1, RAP1A, DMTN, PTPN11, PACSIN3, ARL6IP5, ACTN2, MMP9, APOE, BST2, LGALS3, RAB23, GJA1, STXBP6, ANXA1, ACAA2, RGCC, PACSIN2, SNCA, AGT, CAV1, PICALM, APOA2, APOC3, SERPINE2, CLIC2, APPL1, GSTO1	46	2.05e-06	6.46e-05	0.418977
GO:0006892	GO:0006892	post-Golgi vesicle-mediated transport	ENR	GO:0006892	STX4, RAB14, EXOC4, ANK3, CCDC93, STXBP6, ANKFY1, VPS13C, EHD3, MACF1, EXOC1, EXOC8, DNM2, EXOC2, MYO1B, VAMP2, C16ORF62, SPTBN1	18	3.74e-06	0.00011	0.395861
GO:0048193	GO:0048193	Golgi vesicle transport	ENR	GO:0048193	ANK2, ANK3, F9, MACF1, DCTN1, EXOC8, CD55, EXOC2, SPTA1, SERPINA1, F2, RAB8B, VAMP2, ACTR1A, C16ORF62, STX4, SPTAN1, RAB14, SPTB, EXOC4, DYNC1LI2, CCDC93, STXBP6, ANKFY1, VPS13C, EHD3, BCAP29, SNX2, EXOC1, DNM2, SPTBN4, MYO1B, CUL3, PROS1, CD59, ANK1, DYNC1I2, DYNC1H1, SPTBN1	39	4.66e-06	0.00014	0.385387
GO:1903829	GO:1903829	Positive regulation of cellular protein localization	ENR	GO:1903829	PRKACA, ANK3, MYO1C, STOM, ROCK2, SORBS1, EPB41L2, IPO5, TGFB1, CROCC, HRAS, GNAI1, ITGA3, F2, LRP1, FLNA, VAMP2, ARIH2, STX4, EPB41, LGALS3, GPD1L, PRKAA1, PCNT, ATP2B4, RDX, AP2B1, NPTN, MSN, CD81, RHOG, PPM1A, IQGAP1, CDC42, SPTBN1, EMD	36	2e-05	0.00052	0.3284
GO:0016050	GO:0016050	Vesicle organization	ENR	GO:0016050	CD34, DYSF, CORO1C, CAV2, EXOC8, STX11, DNM3, STX7, SERPINA1, S100A10, RAB8B, VAMP2, CHMP6, STX4, STXBP1, RAB14, PAFAH1B1, ANKFY1, SRPX, ANXA8, DNM2, SNCA, CUL3, CAV1, PICALM, ANXA2, LRMP, CD59, PDCD6IP, HOOK2, SERPINE2	31	0.00015	0.0032	0.249485
GO:0032456	GO:0032456	Endocytic recycling	ENR	GO:0032456	EHD2, RAB14, CCDC93, EHD4, EHD3, EHD1, C16ORF62, VPS53, SNX4	9	0.00035	0.0064	0.219382
GO:0016241	GO:0016241	Regulation of macroautophagy	ENR	GO:0016241	PIP4K2A, PRKACA, EXOC4, ATP6V1H, ATP6V1E1, FYCO1, PRKAA1, SNX5, VPS13C, TMEM173, SNX6, EXOC1, MAPK3, RALB, EXOC8, DCN, LRRK2, VPS35, HSPB8, MTM1	20	0.00049	0.0084	0.207572
GO:0006907	GO:0006907	Pinocytosis	ENR	GO:0006907	DNM2, AHSG, SNX5, EHD4, LRRC16A	5	0.00053	0.009	0.204576
GO:0048259	GO:0048259	Regulation of receptor-mediated endocytosis	ENR	GO:0048259	TF, APOC1, NUMB, APOC2, FLOT1, VTN, HIP1, DNM2, ARRB1, PICALM, ANXA2, APOC3, C3, CLU	14	0.00072	0.0117	0.193181
GO:0032388	GO:0032388	Positive regulation of intracellular transport	ENR	GO:0032388	PRKACA, ANK3, MYO1C, STOM, PRKAA1, PCNT, IPO5, TGFB1, RDX, EHD1, HRAS, EHD2, MSN, CD81, ANXA2, FLNA, VAMP2, PPM1A, DYNC1H1, CDC42, ACTN2, ARIH2, EMD	23	0.00077	0.0125	0.190309
GO:0048548	GO:0048548	Regulation of pinocytosis	ENR	GO:0048548	ACTN4, CAV1, ANKFY1, APPL1, CDC42	5	0.00096	0.0149	0.182681
GO:0002691	GO:0002691	Regulation of cellular extravasation	ENR	GO:0002691	CD99, CXCL12, AGER, PLVAP, BST1, ICAM1, ELANE	7	0.0019	0.026	0.158503
GO:0045806	GO:0045806	Negative regulation of endocytosis	ENR	GO:0045806	CAV1, APOC1, LGALS3, PICALM, APOC2, APOC3, PACSIN3, PACSIN2	8	0.0019	0.026	0.158503
GO:0051043	GO:0051043	Regulation of membrane protein ectodomain proteolysis	ENR	GO:0051043	APOE, SH3D19, TIMP2, TIMP3, ROCK1, PACSIN3	6	0.0019	0.0266	0.157512
GO:0006906	GO:0006906	Vesicle fusion	ENR	GO:0006906	STX4, STX11, STXBP1, SNCA, STX7, DYSF, ANKFY1, LRMP, RAB8B, VAMP2, CAV2	11	0.0021	0.029	0.15376
GO:0046907	GO:0046907	Intracellular transport	ENR	GO:0046907	FHOD1, F9, EHD4, IPO5, TGFB1, KPNA3, LTBP2, STAT3, CAT, FBXO7, C16ORF62, SNX4, APOE, ACTN4, EXOC4, RAB23, DYNC1LI2, VPS13C, EHD2, SPTBN4, CUL3, ANK1, APPL1, TINAGL1, RPS27A, ANK3, SSR2, FYCO1, TUBA1C, LRRK2, VPS35, UBXN6, MID1IP1, F2, RAB8B, CLU, CHMP6, DST, STX4, RPS17, MYO1D, EHD3, AP2A2, ACAA1, AGT, PTK2, WDR91, LMNA, DYNC1H1, SPTBN1, PURA, ANK2, GNAS, MYO1C, RFTN1, MYH10, CES1, FABP3, DCTN1, …	97	0.0021	0.029	0.15376
GO:0016197	GO:0016197	Endosomal transport	ENR	GO:0016197	TINAGL1, RPS27A, RAB14, CCDC93, ANKFY1, SNX5, CORO1C, EHD4, EHD3, DCTN1, SNX2, ANXA8, SNX6, EHD1, VPS53, EHD2, VPS35, UBXN6, PICALM, C16ORF62, CHMP6, SNX4	22	0.0026	0.0342	0.146597
GO:0017157	GO:0017157	Regulation of exocytosis	ENR	GO:0017157	STX4, RALA, STXBP1, UNC13D, HLA-F, GNAI2, STXBP6, ANXA1, RALB, LRRK2, FGG, STXBP2, SNCA, FGB, FGA, CLASP2, PDCD6IP, RAP1A, RAB8B, VAMP2, SNX4	21	0.0033	0.041	0.138722

## Sheet: ECMandWOUNDING
GO Term	Enrichment Map Name	GS_DESCR	GS_Type	Formatted name	Genes	GS_SIZE	Enrichmentp-value	Enrichment FDR q-value	NES
GO:0030198	GO:0030198	Extracellular matrix organization	ENR	GO:0030198	MYH11, CMA1, COL4A4, CTSG, MMP13, ENG, LAMC1, TGFB1, LAMB2, CAV2, EXOC8, NPNT, FLOT1, VTN, AGRN, TPSAB1, KLKB1, FBLN5, TTR, LAMC2, ICAM1, NID1, TNXB, COL5A3, COL18A1, MMP9, LUM, ERO1L, HSPG2, VWA1, MFAP5, ADAM10, ITGA1, VWF, ITGA2B, TIMP2, COL4A2, COL6A1, LAMA2, DPT, COL1A2, ABI3BP, CAPN2, COL6A3, DAG1, COL14A1, COL6A2, MMP28, CRTAP, FBN1, ITGA3, FBLN1, FGB, FGA, PLG, NID2, COL4A1, MMP2, SERPINF2…	78	1.92e-27	1.3e-24	2.38861
GO:0085029	GO:0085029	Extracellular matrix assembly	ENR	GO:0085029	MYH11, LAMB3, FBLN5, PLOD3, COL1A2, TGFB1, LAMB2, TNXB, EMILIN1, MFAP4	10	6.27e-06	0.00018	0.374473
GO:0010712	GO:0010712	Regulation of collagen metabolic process	ENR	GO:0010712	FAP, SERPINF2, ENG, F2, VIM, RAP1A, TGFB1, RGCC, PDGFRB, EMILIN1, MFAP4	11	1.94e-05	0.0005	0.330103
GO:1901201	GO:1901201	Regulation of extracellular matrix assembly	ENR	GO:1901201	AGT, PHLDB1, CLASP2, DAG1, TGFB1, RGCC, EMILIN1	7	2.44e-05	0.00062	0.320761
GO:0030199	GO:0030199	Collagen fibril organization	ENR	GO:0030199	LUM, SERPINF2, DPT, PLOD3, COL1A2, COL14A1, ANXA2, COL12A1, TNXB, COL5A3, CRTAP	11	3.98e-05	0.00095	0.302228
GO:0032963	GO:0032963	Collagen metabolic process	ENR	GO:0032963	ARG1, PRTN3, MMP13, MRC2, PLOD3, COL1A2, TENC1, TNXB, MMP28, MMP2, MMP9	11	0.00045	0.0079	0.210237
GO:1905203	GO:1905203	Regulation of connective tissue replacement	ENR	GO:1905203	AGER, ROCK2, ROCK1	3	0.0028	0.0358	0.144612
GO:0009611	GO:0009611	Response to wounding	ENR	GO:0009611	ARG1, GNAS, ACTB, ENTPD1, VCL, F12, MYH10, ENG, F9, MACF1, TGFB1, LAMB2, PDGFRB, PPL, SERPINA10, SLC4A1, HRG, HBE1, DPYSL3, HBG2, PRTN3, KLKB1, HBD, APOA1, MCAM, APOD, NRP1, FLNA, PRKAR2A, KIAA1715, STXBP1, MYL9, AGER, ILK, VWF, ITGA2B, DSP, GNAQ, MAPK3, CD9, EHD2, F13A1, PROS1, PAPSS2, PRKCA, KNG1, COL1A2, MMRN1, CD59, SERPINE2, ITPR1, CDC42, SAA1, PRKACA, SERPING1, CD34, DYSF, DAG1, CD36, ANXA5…	94	2.66e-25	1.42e-22	2.18477
GO:0022610	GO:0022610	Biological adhesion	ENR	GO:0022610	STK10, PGM5, VCL, LAMC1, LAMB2, NPNT, VTN, ADD2, SGCE, EPB41L5, MCAM, LAMC2, ICAM1, NID1, NRP1, TNXB, CD93, COL5A3, COL6A5, SPARCL1, ESAM, IGFALS, PXN, MYL9, CDH11, LSAMP, CDH13, ITGA1, VWF, BCAM, ITGA2B, HMCN1, NPTN, CD81, HABP2, AZGP1, LIMS1, AMBP, PEAK1, PCDH1, TLN2, SPON1, CD34, COL6A3, COL14A1, COL6A2, FBN1, NCAM1, FGB, FGA, PARVA, CTNNA1, NEO1, TLN1, FERMT2, DST, CDH5, AOC3, STXBP6, APOA4, …	127	1.13e-24	5.19e-22	2.12848
GO:0006928	GO:0006928	Movement of cell or subcellular component	ENR	GO:0006928	GYPC, LBP, LAMC1, TGFB1, TMOD1, LAMB2, PDGFRB, EPX, VTN, ADD2, APOB, PRTN3, EPB41L5, APOA1, LAMC2, ICAM1, LRP1, ENPEP, MYH2, NRP1, DNAH5, LIMD1, ACTN4, ESAM, PXN, LGALS3, DYNC1LI2, GPD1L, GJA1, CDH13, ITGA1, MAPK3, HMGB4, FMNL2, NPTN, SPTBN4, CUL3, SAA4, HMGB2, COL1A2, CFL2, PEAK1, BIN2, IQGAP1, SLC7A6, GPC2, CD34, FYCO1, KANK2, PPBP, LRRK2, NCAM1, PARVA, SCG2, F2, PLG, SGCD, DPYSL2, PTPN11, SDC2…	152	6.75e-18	1.14e-15	1.49431
GO:0032101	GO:0032101	Regulation of response to external stimulus	ENR	GO:0032101	CMA1, HLA-F, F12, LBP, FABP4, TGFB1, PDGFRB, VTN, PPM1F, LTF, HRG, STAT3, KLKB1, APOA1, LRP1, NRP1, C3, MGLL, SNX4, APOE, SCGB1A1, GJA1, ADAM10, CDH13, MAPK3, HMGB4, CASP1, CD81, MUC5B, USP15, BST1, HMGB2, KNG1, HPX, PRDX2, APPL1, PRKACA, SERPING1, CD34, KANK2, CD109, MMP28, LRRK2, VPS35, FGB, FGA, SCG2, F2, PSMF1, PLG, PTPN11, STX4, VSIG4, CDH5, SERPINF2, A2M, PAK2, TMEM173, HLA-DRB1, FGG, SNCA,…	113	5.1e-16	6.76e-14	1.31701
GO:0061041	GO:0061041	Regulation of wound healing	ENR	GO:0061041	SERPING1, CD34, F12, CD109, PRKG1, CD36, HRAS, VTN, ANO6, HRG, FGB, KLKB1, FGA, CLASP2, F2, PLG, DMTN, APOE, SERPINF2, AGER, GJA1, ANXA1, OCLN, MYLK, CD9, FGG, FAP, CAV1, PTK2, PROS1, PRKCA, KNG1, ANXA2, SERPINC1, SERPINE2, APCS, PRDX2	37	3.33e-15	3.89e-13	1.24101
GO:0032102	GO:0032102	Negative regulation of response to external stimulus	ENR	GO:0032102	ARG1, SERPING1, CD34, HLA-F, CALCRL, F12, KANK2, CD109, PRKG1, MMP28, ACP5, VTN, VPS35, SEMA3B, LTF, HRG, FGB, KLKB1, FGA, APOA1, CLASP2, APOD, F2, PLG, NRP1, CARD16, APOE, VSIG4, CDH5, HLA-E, C5, SERPINF2, AGER, A2M, GJA1, ELANE, CD9, HLA-DRB1, PTGIS, FGG, PROS1, KNG1, ANXA2, SERPINE2, APCS, PRDX2, SAA1, NT5E	48	2.14e-09	1.25e-07	0.690309
GO:0098609	GO:0098609	Cell-cell adhesion	ENR	GO:0098609	GNAS, STK10, ACTB, VCL, NEXN, NPNT, ADD2, S100A9, ICAM1, FLNA, CD93, SPARCL1, STXBP1, ESAM, MYL9, ILK, CDH11, ANXA1, CDH13, CTNND1, ITGA2B, HMCN1, DSP, NPTN, PLXNB2, LIMS1, ROCK1, PCDH1, TLN2, CD34, TJP2, COL14A1, PDLIM1, PDLIM5, FGB, FGA, PARVA, CTNNA1, TLN1, CDH5, PECAM1, STXBP6, ITGA8, APOA4, PKP2, HBB, MSN, CLDN18, FGG, CD99, MLLT4, LAMA3, CTNNB1, CSRP1, ANXA2, LAMA5, NT5E	57	9.04e-09	4.61e-07	0.63363
GO:0051271	GO:0051271	Negative regulation of cellular component movement	ENR	GO:0051271	VCL, ENG, DAG1, CORO1C, TGFB1, PRKG1, MMRN2, CLIC4, MMP28, SEMA3B, HRG, FBLN1, STAT3, DPYSL3, CLASP2, APOD, PODN, LRP1, CTNNA1, NISCH, NRP1, EVL, APOE, BST2, ACTN4, C5, CXCL12, ILK, RGN, GJA1, ARHGDIB, ATP2B4, RGCC, DCN, LIMCH1, EMILIN1, CD9, IGFBP3, RRAS, MECP2, MLLT4, PIN1	42	9.56e-09	4.84e-07	0.631515
GO:0022617	GO:0022617	Extracellular matrix disassembly	ENR	GO:0022617	CAPN2, CMA1, CTSG, MMP13, A2M, ENG, ADAM10, ELANE, LAMC1, TIMP2, EXOC8, FLOT1, TPSAB1, KLKB1, PLG, MMP2, MMP9	17	1.36e-07	5.43e-06	0.52652
GO:0032103	GO:0032103	Positive regulation of response to external stimulus	ENR	GO:0032103	ARG1, HLA-F, F12, LBP, FABP4, TGFB1, TGM2, PDGFRB, PPM1F, HRG, STAT3, KLKB1, S100A12, S100A9, LRP1, NRP1, C3, FCN1, SNX4, CXCL12, AGER, ADAM10, CDH13, MAPK3, HMGB4, CD81, MUC5B, USP15, HMGB2, PRKCA, HPX, APPL1, PRKACA, DYSF, PSMD9, HRAS, ANO6, LRRK2, SCG2, F2, PSMF1, RARRES2, PLG, RELB, STX4, HLA-E, SERPINF2, PAK2, TMEM173, SNCA, AGT, PTK2, S100A14	53	3.56e-07	1.3e-05	0.488606
GO:0090303	GO:0090303	Positive regulation of wound healing	ENR	GO:0090303	SERPINF2, F12, ANXA1, OCLN, MYLK, CD36, HRAS, VTN, ANO6, HRG, PTK2, F2, PLG, DMTN, PRDX2	15	8.5e-07	2.88e-05	0.454061
GO:0034446	GO:0034446	Substrate adhesion-dependent cell spreading	ENR	GO:0034446	PXN, ILK, ITGA8, LAMC1, LAMB2, PARVB, LAMB3, PARVA, LAMA5, NRP1, PEAK1, TGFB1I1, FERMT2	13	3.05e-06	9.36e-05	0.402872
GO:0001667	GO:0001667	Ameboidal-type cell migration	ENR	GO:0001667	KANK2, PDLIM1, CORO1C, MMRN2, SEMA3B, EPB41L5, APOA1, TNS1, SCG2, EFNB1, NRP1, PTPN11, CDH5, PXN, ILK, PECAM1, ANXA6, PAFAH1B1, CDH13, CLEC14A, FAP, PTK2, LAMA5, TGFB1I1, IQGAP1	25	3.22e-06	9.77e-05	0.401011
GO:0010632	GO:0010632	Regulation of epithelial cell migration	ENR	GO:0010632	ROCK2, CTSH, CORO1C, MACF1, TGFB1, MAPRE2, MMRN2, PPM1F, ITGA3, HRG, EPB41L5, CLASP2, PLG, NRP1, KIAA1462, GLIPR2, EVL, MMP9, APOE, ANXA1, ATP2B4, RGCC, DCN, RRAS, AGT, MECP2, ANXA3, PTK2, PRKCA	29	4.93e-06	0.00014	0.385387
GO:0034114	GO:0034114	Regulation of heterotypic cell-cell adhesion	ENR	GO:0034114	FGG, FGB, AGER, FGA, ALOX15, APOA1, MYADM, FLOT1	8	8.3e-05	0.0019	0.272125
GO:0043542	GO:0043542	Endothelial cell migration	ENR	GO:0043542	CDH5, FAP, PXN, PECAM1, PTK2, APOA1, CDH13, SCG2, CLEC14A, NRP1, MMRN2, TGFB1I1	12	0.0002	0.0041	0.238722
GO:0051491	GO:0051491	Positive regulation of filopodium assembly	ENR	GO:0051491	RALA, DNM3, AGRN, DPYSL3, NRP1, PALM, ARAP1, CDC42	8	0.00024	0.0047	0.23279
GO:0022411	GO:0022411	Cellular component disassembly	ENR	GO:0022411	CAPN2, CMA1, SPATA18, MRPL40, CTSG, MMP13, ENG, LAMC1, DFFB, DCTN1, APEH, EXOC8, FLOT1, TPSAB1, KLKB1, C1QC, C1QA, PLG, FBXO7, MMP2, MMP9, A2M, PAFAH1B1, ADAM10, MRPL51, C1QB, ELANE, TMEM173, TIMP2, CAV1, HMGB2, CTNNB1, PRKCA, CFL2, DNASE1L3, DSTN	36	0.00029	0.0054	0.226761
GO:0071360	GO:0071360	Cellular response to exogenous dsrna	ENR	GO:0071360	CAV1, IFIT1, TMEM173, RALB, COLEC12, FLOT1	6	0.00043	0.0076	0.211919
GO:0060353	GO:0060353	Regulation of cell adhesion molecule production	ENR	GO:0060353	CAV1, APOA1, COLEC12, FLOT1	4	0.0015	0.022	0.165758
GO:0031348	GO:0031348	Negative regulation of defense response	ENR	GO:0031348	APOE, ARG1, VSIG4, CDH5, SERPING1, HLA-E, HLA-F, AGER, CALCRL, A2M, ELANE, ACP5, HLA-DRB1, PTGIS, VPS35, APOA1, F2, APOD, APCS, NT5E, SAA1	21	0.002	0.0278	0.155596

## Sheet: SMALL_MOLECULE_MET
GO Term	Enrichment Map Name	GS_DESCR	GS_Type	Formatted name	Genes	GS_SIZE	p-value	Enrichment FDR q-value	NES
GO:0044281	GO:0044281	Small molecule metabolic process	ENR	GO:0044281	ALDH1A2, CYP27A1, PGM5, GMPR, HAGH, TGFB1, PCYOX1, ALDH2, MPO, OGN, LTA4H, LCAT, ASRGL1, APOB, BTD, APOA1, CAD, TTR, CAT, CKMT1A, GUCY1B3, C3, MGLL, FBP1, APOE, GLUD1, ACAT1, LUM, RAB23, IVD, DDAH1, ABHD14B, ACAA2, CA2, GC, CA1, MAPK3, NAAA, ITIH1, IDI2, ECHDC1, BDH2, QDPR, ALDH1A1, ACSS3, RPIA, ALDH6A1, ITIH4, CKB, CA3, ADH1B, APOC1, HPGD, PANK2, PDXK, CRYL1, HK3, BCAT2, FN3K, CA4, ALOX5AP, FABP…	161	8.11e-17	1.21e-14	1.39172
GO:0048585	GO:0048585	Negative regulation of response to stimulus	ENR	GO:0048585	HLA-F, F12, PEBP1, TGFB1, CAV2, VTN, LTF, HRG, KLKB1, APOA1, ICAM1, LRP1, NRP1, FBXO7, FBP1, LIMD1, APOE, BST2, LGALS3, GPD1L, GJA1, ITGA1, DDAH1, VPS13C, ACAA2, TIMP2, CUL3, HMGB2, KNG1, CGNL1, AMBP, NDRG2, TIMP3, PRDX2, APPL1, ITPR1, SZT2, RPS27A, PRKACA, SERPING1, CD34, GNAI2, KANK2, CD109, TENC1, MMP28, FBN1, LRRK2, VPS35, FBLN1, FGB, FGA, SCG2, F2, PSMF1, PLG, CTNNA1, C4BPA, CLU, PALM, PRKCD…	139	5.06e-11	3.8e-09	0.842022
GO:0009056	GO:0009056	Catabolic process	ENR	GO:0009056	CYP27A1, HBZ, HAGH, MMP13, NAPSA, BLVRA, CTSH, FABP4, CPVL, TGFB1, PCYOX1, ALDH2, MPO, OGN, EPX, LTA4H, BLVRB, ASRGL1, APOB, PRTN3, CAT, LRP1, ENPEP, PNPLA6, FBXO7, MGLL, APOE, GLUD1, ACAT1, LUM, RAB23, GPD1L, IVD, DDAH1, ACAA2, NAAA, ACE, RNH1, CUL3, ECHDC1, USP15, BDH2, QDPR, HMGB2, AMBP, ALDH1A1, ALDH6A1, PRDX2, GPC2, RPS27A, CAPN2, SPATA18, CRYL1, HK3, MMP28, BCAT2, FABP5, EPHX1, LRRK2, GPD1,…	163	7.4e-11	5.41e-09	0.82668
GO:0032787	GO:0032787	Monocarboxylic acid metabolic process	ENR	GO:0032787	ALDH1A2, CYP27A1, HAGH, CES1, UGT1A7, FABP3, PKLR, LTA4H, ASRGL1, BTD, ALDH3A2, CKMT1A, C3, MGLL, BPGM, ACSL5, ACAT1, IVD, ACAA2, MAPK3, NAAA, QKI, ECHDC1, BDH2, CKB, POR, ADH1B, HSD17B4, ADH1C, EPHX2, HPGD, PANK2, CRYL1, HK3, CD36, ALOX5AP, EPHX1, SLC27A3, LYPLA2, FASN, ACOT8, CKM, PON1, OGDH, PFKM, CSPG4, PRKAA1, ALOX15, ECHDC3, DCN, ACAA1, ACADS, PTGIS, ENO3, PC, ACSS2, BGN	57	1.69e-08	8.09e-07	0.609205
GO:1901564	GO:1901564	Organonitrogen compound metabolic process	ENR	GO:1901564	STK10, GMPR, CTSG, MMP13, PEBP1, F9, LPCAT3, CTSH, PPP2R5A, TGFB1, OGN, LTA4H, PPM1F, BLVRB, LTF, APOB, PRTN3, APOA1, TTR, CAT, LRP1, GUCY1B3, C3, SHC2, ESYT2, APOE, ACAT1, LUM, ADAM10, VWF, MAPK3, DNPEP, ITIH1, SPTBN4, HABP2, CUL3, F13A1, HMBS, USP15, QDPR, KNG1, AMBP, HSPB8, HPX, ITIH4, TINAGL1, GPC2, RPS27A, CAPN2, SERPING1, SPATA18, LPCAT1, PDXK, HK3, COPS2, APEH, FN3K, FABP5, LRRK2, EVPL, UB…	324	3.48e-08	1.59e-06	0.57986
GO:0045936	GO:0045936	Negative regulation of phosphate metabolic process	ENR	GO:0045936	PEBP1, ENG, FABP4, PPP2R5A, IPO5, TGFB1, SNX6, PTPN13, SLC4A1, PPM1F, STAT3, MYADM, PRKAR2A, FBXO7, FBP1, APOE, LGALS3, ILK, GPD1L, RGN, PAFAH1B1, FKBP1A, GNAQ, AMBP, NDRG2, TIMP3, ROCK1, IQGAP1, APOC1, LPCAT1, GNAI2, AHSG, CD109, DAG1, ROCK2, CORO1C, FARP1, LRRK2, ARRB1, GPRC5A, FBLN1, DMTN, PPP1R14B, CHMP6, AIDA, MYO1D, OCLN, PAK2, EMILIN1, IGFBP3, DMD, SNCA, AGT, CAV1, RASIP1, PIN1	56	5.13e-07	1.82e-05	0.473993
GO:0044282	GO:0044282	Small molecule catabolic process	ENR	GO:0044282	ARG1, CYP27A1, ENTPD1, HAGH, CRYL1, HK3, TGFB1, PCYOX1, ALDH2, PKLR, BCAT2, ASRGL1, LYPLA2, DERA, ALDH3A2, DDAH2, ACOT8, BPGM, APOE, GLUD1, PON1, ACAT1, SULT1A1, OGDH, PFKM, IVD, DDAH1, ESD, ALDH3B1, ACAA2, GALT, ACAA1, AKR1B10, PGM2, ACADS, ECHDC1, CRYM, ENO3, BDH2, QDPR, ALDH1A1, ALDH6A1, OAT, NT5E, SULT1A2, HSD17B4	46	6.87e-07	2.37e-05	0.462525
GO:0005996	GO:0005996	Monosaccharide metabolic process	ENR	GO:0005996	PGM5, RBP4, CRYL1, CYB5R3, UGT1A7, HK3, PKLR, CYB5A, FABP5, FBN1, GPD1, APOD, NISCH, BPGM, FBP1, PFKM, PRKAA1, RGN, MAN2C1, GALT, PGM2, ENO3, ALDH1A1, PC, RPIA, SLC2A1, GSTO1	27	3.52e-06	0.00011	0.395861
GO:0044283	GO:0044283	Small molecule biosynthetic process	ENR	GO:0044283	ALDH1A2, CYP27A1, RBP4, CES1, CYB5R3, PKLR, MPO, PYCR2, LTA4H, APOA1, CAD, PDE5A, MGLL, FBP1, GLUD1, FDPS, ACAT1, RGN, LSS, ACAA2, ASAH1, IDI2, QKI, BDH2, QDPR, ACSS3, OAT, HSD17B4, EPHX2, PLCD1, HPGD, PDXK, BCAT2, PRPS1, ALOX5AP, GPD1, DERA, CYP51A1, FASN, ACOT8, ASL, CSPG4, PRKAA1, ALOX15, APOA4, DCN, PTGIS, ENO3, PLOD3, PC, ACSS2, BGN, NT5E	53	7.62e-06	0.00021	0.367778
GO:0034308	GO:0034308	Primary alcohol metabolic process	ENR	GO:0034308	ADH1C, ALDH1A2, SULT1A1, RBP4, ALDH3B1, ALDH2, AKR7A2, NAAA, AKR1B10, GPD1, TTR, ALDH1A1, ALDH3A2, ACSS2, ADH1B, SULT1A2	16	7.36e-06	0.00021	0.367778
GO:0019637	GO:0019637	Organophosphate metabolic process	ENR	GO:0019637	GMPR, LPCAT3, TGFB1, PKLR, PDGFRB, PTPN13, SERINC1, LCAT, APOA1, CAD, CKMT1A, PNPLA6, GUCY1B3, AK5, PDE5A, MTM1, BPGM, FBP1, ACSL5, FDPS, ACAT1, SULT1A1, RAB14, RAB23, GPD1L, PAFAH1B1, ABHD14B, SULT1A4, PGM2, IDI2, MECP2, PAPSS2, ALDH1A1, RPIA, CKB, MPP1, HSD17B4, PLCD1, LPCAT1, TJP2, PANK2, PDXK, CRYL1, HK3, PRPS1, FABP5, LRRK2, GPD1, AK1, DERA, ADSL, FASN, ACOT8, ABHD12, CKM, PIP4K2A, PON1, OGD…	72	7.74e-06	0.00022	0.365758
GO:0019693	GO:0019693	Ribose phosphate metabolic process	ENR	GO:0019693	GMPR, TJP2, PANK2, HK3, TGFB1, PKLR, PRPS1, LRRK2, AK1, ADSL, CAD, FASN, GUCY1B3, AK5, PDE5A, ACOT8, BPGM, ACSL5, ACAT1, SULT1A1, OGDH, PFKM, RAB23, PFAS, ABHD14B, GIMAP7, SULT1A4, ENO3, PAPSS2, ACSS2, RPIA, MPP1, NT5E, SULT1A2, HSD17B4	35	2.12e-05	0.00055	0.325964
GO:1901135	GO:1901135	Carbohydrate derivative metabolic process	ENR	GO:1901135	GMPR, TGFB1, IDS, PKLR, PDGFRB, OGN, AGRN, PRELP, CAD, PGLYRP2, GUCY1B3, AK5, PDE5A, BPGM, FBP1, ESYT2, ACSL5, ACAT1, SULT1A1, LUM, HSPG2, ITIH2, RAB23, GPD1L, ABHD14B, SULT1A4, ASAH1, PGM2, ITIH1, MUC5B, PAPSS2, ALDH1A1, RPIA, ITIH4, MPP1, HSD17B4, GPC2, TJP2, PANK2, CRYL1, HK3, FN3K, PRPS1, LRRK2, GPD1, CHST9, AK1, ITIH3, DERA, ADSL, FASN, SDC2, ACOT8, B4GALT2, OGDH, PFKM, CSPG4, PFAS, GALT, GI…	73	0.00019	0.0039	0.240894
GO:1901565	GO:1901565	Organonitrogen compound catabolic process	ENR	GO:1901565	ARG1, UBA7, NAPSA, BLVRA, CTSH, CPVL, TGFB1, IDS, PCYOX1, OGN, LTA4H, MAOB, BLVRB, AGRN, ASRGL1, APOB, PRELP, ENPEP, PGLYRP2, PDE5A, FBXO7, ARIH2, APOE, GLUD1, ACAT1, LUM, HSPG2, IVD, SNX5, DDAH1, ASAH1, ACE, CUL3, USP15, QDPR, AMBP, PDCD6IP, ALDH6A1, OAT, DDI2, GPC2, CPN1, RPS27A, CAPN2, SPATA18, PSMD9, RAD23A, BCAT2, ARRB1, UBXN6, LYPLA2, DERA, PSMF1, PLG, AOX1, MAOA, SYNPO2, SDC2, CLU, DDAH2, …	77	0.00028	0.0054	0.226761
GO:0019852	GO:0019852	L-ascorbic acid metabolic process	ENR	GO:0019852	RGN, CYB5R3, SLC2A1, CYB5A, GSTO1	5	0.00053	0.009	0.204576
GO:0019674	GO:0019674	NAD metabolic process	ENR	GO:0019674	GPD1, PFKM, ENO3, GPD1L, BST1, HK3, PKLR, BPGM, NT5E	9	0.00062	0.0104	0.198297
GO:0006069	GO:0006069	Ethanol oxidation	ENR	GO:0006069	ADH1C, ALDH1A1, ACSS2, ALDH2, ADH1B	5	0.00072	0.0117	0.193181
GO:0009064	GO:0009064	Glutamine family amino acid metabolic process	ENR	GO:0009064	GLUD1, ARG1, MECP2, ASRGL1, CAD, PFAS, DDAH1, OAT, DDAH2, ASL, PYCR2	11	0.00088	0.0139	0.185699
GO:0009895	GO:0009895	Negative regulation of catabolic process	ENR	GO:0009895	ALAD, DYSF, APOC1, CIRBP, SLC4A1, LRRK2, VPS35, STAT3, CYP51A1, PSMF1, FLNA, MTM1, FBP1, LAMP3, PRKAA1, RGN, ATP2B4, TIMP2, SNCA, PTK2, RASIP1, ANXA2, APOA2, APOC3, SERPINE2, HP, TIMP3, ROCK1, PIN1	29	0.00098	0.0151	0.182102
GO:0009179	GO:0009179	Purine ribonucleoside diphosphate metabolic process	ENR	GO:0009179	AK1, OGDH, PFKM, ENO3, TJP2, HK3, AK5, PKLR, MPP1, BPGM	10	0.0012	0.0185	0.173283
GO:0006778	GO:0006778	Porphyrin-containing compound metabolic process	ENR	GO:0006778	BLVRB, ALAD, SPTA1, HMBS, BDH2, BLVRA, AMBP, HPX	8	0.0012	0.0185	0.173283
GO:0034310	GO:0034310	Primary alcohol catabolic process	ENR	GO:0034310	SULT1A1, ALDH3B1, ALDH2, AKR1B10, SULT1A2	5	0.0016	0.0231	0.163639
GO:0072330	GO:0072330	Monocarboxylic acid biosynthetic process	ENR	GO:0072330	ALDH1A2, CYP27A1, EPHX2, CSPG4, PRKAA1, ALOX15, HPGD, PKLR, DCN, ALOX5AP, LTA4H, PTGIS, QKI, FASN, ACSS2, ACOT8, MGLL, BGN, HSD17B4	19	0.002	0.0276	0.155909
GO:0016052	GO:0016052	Carbohydrate catabolic process	ENR	GO:0016052	OGDH, PFKM, CRYL1, HK3, MAN2C1, GALT, PKLR, PGM2, CTBS, ENO3, DERA, PYGM, ALDH1A1, BPGM	14	0.002	0.0279	0.15544
GO:0006525	GO:0006525	Arginine metabolic process	ENR	GO:0006525	ARG1, DDAH1, OAT, DDAH2, ASL	5	0.002	0.0279	0.15544
GO:1901606	GO:1901606	Alpha-amino acid catabolic process	ENR	GO:1901606	GLUD1, ARG1, ACAT1, OGDH, IVD, DDAH1, BCAT2, ASRGL1, CRYM, QDPR, ALDH6A1, OAT, DDAH2	13	0.0023	0.0311	0.150724
GO:0006790	GO:0006790	Sulfur compound metabolic process	ENR	GO:0006790	HAGH, IDS, PCYOX1, OGN, CHST9, BTD, PRELP, FASN, ACOT8, ACSL5, ACAT1, B4GALT2, SULT1A1, OGDH, LUM, CSPG4, ESD, ABHD14B, SULT1A4, DCN, PAPSS2, PC, ACSS2, GSTM5, GSTM3, BGN, GSTO1, AHCYL1, SULT1A2, HSD17B4	30	0.0026	0.0339	0.14698
GO:0009112	GO:0009112	Nucleobase metabolic process	ENR	GO:0009112	GMPR, CAD, TTR, PFAS, AOX1, ALDH6A1, PRPS1	7	0.0033	0.0404	0.139362
GO:0006766	GO:0006766	Vitamin metabolic process	ENR	GO:0006766	ALDH1A2, CYP27A1, RGN, PANK2, PDXK, CYB5R3, GC, ACP5, CYB5A, BTD, AOX1, PC, SLC2A1, GSTO1	14	0.0033	0.0407	0.139041

## Sheet: OXIDATIVE_STRESS
GO Term	Enrichment Map Name	GS_DESCR	GS_Type	Formatted name	Genes	GS_SIZE	Enrichment p-value	Enrichment FDR q-value	NES
GO:1990748	GO:1990748	Cellular detoxification	ENR	GO:1990748	APOE, HBM, HBZ, HBA1, ESD, APOA4, MPO, APOM, EPX, ALOX5AP, AKR1B10, HBB, HBG1, SOD3, HBE1, HBG2, HBD, S100A9, CAT, HP, GSTM3, PRDX2, CLIC2, GSTO1	24	1.5e-09	8.91e-08	0.705012
GO:2000377	GO:2000377	Regulation of reactive oxygen species metabolic process	ENR	GO:2000377	CD34, CRYAB, GNAI2, ROCK2, TGFB1, CD36, PDGFRB, ACP5, STAT3, FBLN5, F2, ICAM1, CLU, DDAH2, RGN, DDAH1, ATP2B4, HBB, PTGIS, DNM2, ACE2, SNCA, AGT, CAV1, BST1, HP, PRDX2, SZT2	28	4.91e-07	1.76e-05	0.475449
GO:0072593	GO:0072593	Reactive oxygen species metabolic process	ENR	GO:0072593	HBM, HBZ, HBA1, APOA4, GCHFR, MPO, EPX, HBB, LRRK2, HBG1, MAOB, SOD3, HBE1, HBG2, HBD, CAT, DDAH2, PRDX2, SFTPD, POR	20	1.85e-06	5.91e-05	0.422841
GO:0006979	GO:0006979	Response to oxidative stress	ENR	GO:0006979	ARG1, CAPN2, ALAD, AQP1, CRYAB, PDLIM1, CD36, RBPMS, MPO, PDGFRB, EPX, SLC1A1, ATRN, PYCR2, LRRK2, APOD, CAT, SEPP1, GUCY1B3, MMP2, ARL6IP5, MMP9, APOE, STX4, SCGB1A1, ERO1L, PXN, HBA1, PRKAA1, ANXA1, MB, ALDH3B1, APOA4, MAPK3, HBB, DNM2, SNCA, SOD3, HP, CA3, PRDX2	41	6.6e-06	0.00019	0.372125
GO:0051341	GO:0051341	Regulation of oxidoreductase activity	ENR	GO:0051341	APOE, AOC3, GNAI2, RGN, ENG, NOSTRIN, DDAH1, ATP2B4, SLC4A1, LRRK2, DNM2, SNCA, AGT, CAV1, HP, DDAH2, POR, SZT2	18	1.92e-05	0.0005	0.330103
GO:0045019	GO:0045019	Negative regulation of nitric oxide biosynthetic process	ENR	GO:0045019	PTGIS, CD34, CAV1, RGN, ROCK2, ATP2B4, ACP5	7	3.44e-05	0.00084	0.307572
GO:0090322	GO:0090322	Regulation of superoxide metabolic process	ENR	GO:0090322	AGT, GNAI2, RGN, BST1, FBLN5, TGFB1, CD36, ACP5, SZT2	9	0.00015	0.0031	0.250864
GO:0051354	GO:0051354	Negative regulation of oxidoreductase activity	ENR	GO:0051354	SLC4A1, LRRK2, SNCA, CAV1, AOC3, ENG, ATP2B4, HP	8	0.00049	0.0085	0.207058
GO:0007263	GO:0007263	Nitric oxide mediated signal transduction	ENR	GO:0007263	APOE, AGT, DDAH1, GUCY1B3, CD36, DDAH2	6	0.00087	0.0137	0.186328
GO:0010269	GO:0010269	Response to selenium ion	ENR	GO:0010269	ARG1, MAOB, ALAD, APOB	4	0.0021	0.0288	0.154061
GO:0045429	GO:0045429	Positive regulation of nitric oxide biosynthetic process	ENR	GO:0045429	DNM2, AGT, ICAM1, DDAH1, CD36, CLU, DDAH2, HBB	8	0.0021	0.0288	0.154061
GO:0006081	GO:0006081	Cellular aldehyde metabolic process	ENR	GO:0006081	ALDH1A2, HAGH, ALDH9A1, PDXK, ALDH1A1, ALDH3A2, ESD, ALDH3B1, AKR7A2	9	0.0022	0.0292	0.153462
GO:1901031	GO:1901031	Regulation of response to reactive oxygen species	ENR	GO:1901031	LRRK2, RGN, FBLN5, CD36, FBXO7, PAWR, SZT2	7	0.0025	0.0326	0.148678
GO:0050999	GO:0050999	Regulation of nitric-oxide synthase activity	ENR	GO:0050999	APOE, DNM2, CAV1, ENG, NOSTRIN, DDAH1, ATP2B4, DDAH2	8	0.0027	0.035	0.145593
GO:0010044	GO:0010044	Response to aluminum ion	ENR	GO:0010044	MAOB, ALAD, QDPR	3	0.0028	0.0358	0.144612
GO:0034614	GO:0034614	Cellular response to reactive oxygen species	ENR	GO:0034614	ARG1, PXN, AQP1, PRKAA1, ANXA1, APOA4, MPO, PDGFRB, MAPK3, DNM2, SOD3, GUCY1B3, PRDX2, MMP2, MMP9	15	0.0028	0.0358	0.144612

## Sheet: BLOOD_COAG
GO Term	Enrichment Map Name	GS_DESCR	GS_Type	Formatted name	Genes	GS_SIZE	p-value	Enrichment FDR q-value	NES
GO:0002576	GO:0002576	Platelet degranulation	ENR	GO:0002576	VCL, FAM3C, TGFB1, CYB5R1, HRG, APOA1, NHLRC2, FLNA, STXBP1, ACTN4, ORM1, VWF, ITGA2B, A1BG, CD9, GIG25, F13A1, PROS1, KNG1, MMRN1, ITIH4, TIMP3, TF, SERPING1, AHSG, CD109, ORM2, PPBP, CLEC3B, CD36, ANXA5, STXBP2, ITIH3, FGB, SERPINA1, FGA, RARRES2, PLG, SEPP1, DMTN, MANF, CLU, TLN1, ACTN2, SERPINA4, SERPINF2, PECAM1, A2M, CFD, FGG	50	3.71e-26	2.17e-23	2.26635
GO:0043086	GO:0043086	Negative regulation of catalytic activity	ENR	GO:0043086	PEBP1, FABP4, PPP2R5A, IPO5, GCHFR, SERPINA10, VTN, C4A, SLC4A1, PPM1F, LTF, HRG, PPP1R12C, APOA1, LRP1, C3, PRKAR2A, FBXO7, APOE, LAMP3, BST2, SCGB1A1, LGALS3, TIMP2, GNAQ, ITIH1, RNH1, ANXA3, KNG1, AMBP, ITIH4, TIMP3, IQGAP1, SERPING1, COL6A3, AQP1, APOC1, GNAI2, CD109, ROCK2, FARP1, PPP1R12B, ANXA5, LRRK2, SERPINA7, SERPINA5, PSMF1, PALM, PPP1R14B, CHMP6, SERPINF2, AOC3, A2M, AIDA, MYO1D, SERP…	107	5.4e-20	1.16e-17	1.69355
GO:0010466	GO:0010466	Negative regulation of peptidase activity	ENR	GO:0010466	PEBP1, SERPINA10, VTN, C4A, LTF, HRG, LRP1, C3, MMP9, LAMP3, BST2, ITIH2, TIMP2, ITIH1, GIG25, PICALM, PROS1, KNG1, AMBP, SERPINE2, ITIH4, TIMP3, ROCK1, POR, SERPING1, COL6A3, AQP1, CRYAB, AHSG, CD109, ARRB1, SERPINA7, ITIH3, C4B, SERPINA5, SERPINA1, PSMF1, CARD16, SERPINA4, C5, SERPINF2, A2M, SERPINA6, PAPLN, PAK2, ANXA8, RPS6KA3, SERPINB6, SNCA, AGT, SERPIND1, ANXA2, SERPINC1	53	3.23e-17	5.01e-15	1.43002
GO:0030168	GO:0030168	Platelet activation	ENR	GO:0030168	GNAS, ACTB, VCL, ARRB1, HRG, FGB, FGA, F2, FLNA, PTPN11, TLN1, STXBP1, MYL9, ILK, VWF, ITGA2B, GNAQ, MAPK3, HBB, CD9, GNA11, FGG, CSRP1, PRKCA, COL1A2, ITPR1, SAA1	27	3.78e-09	2.11e-07	0.667572
GO:0034109	GO:0034109	Homotypic cell-cell adhesion	ENR	GO:0034109	GNAS, STXBP1, ACTB, MYL9, VCL, ILK, TJP2, ITGA2B, DSP, PKP2, HBB, FGG, CD99, FGB, FGA, CSRP1, FLNA, TLN1	18	4.11e-09	2.27e-07	0.664397
GO:0042730	GO:0042730	Fibrinolysis	ENR	GO:0042730	FGG, SERPING1, SERPINF2, HRG, FGB, F12, KLKB1, FGA, PROS1, F2, ANXA2, PLG	12	6.3e-09	3.31e-07	0.648017
GO:0072378	GO:0072378	Blood coagulation, fibrin clot formation	ENR	GO:0072378	SERPING1, F12, A2M, F9, VWF, FGG, FBLN1, F13A1, FGB, KLKB1, FGA, KNG1, F2	13	7.8e-09	4.04e-07	0.639362
GO:0051917	GO:0051917	Regulation of fibrinolysis	ENR	GO:0051917	FAP, HRG, SERPINF2, F12, KLKB1, F2, PLG	7	2.44e-05	0.00062	0.320761
GO:0020027	GO:0020027	Hemoglobin metabolic process	ENR	GO:0020027	AHSP, ADD1, CAT, HPX, EPB42	5	0.00053	0.009	0.204576
GO:0031638	GO:0031638	Zymogen activation	ENR	GO:0031638	FGG, FGB, CD5L, F12, KLKB1, FGA, F9, CTSH, C1R	9	0.00054	0.0092	0.203621
GO:0010544	GO:0010544	Negative regulation of platelet activation	ENR	GO:0010544	APOE, FGG, F2, PRKG1, SERPINE2, CD9	6	0.00069	0.0114	0.19431
GO:0051919	GO:0051919	Positive regulation of fibrinolysis	ENR	GO:0051919	F12, KLKB1, PLG	3	0.0028	0.0358	0.144612
GO:0045862	GO:0045862	Positive regulation of proteolysis	ENR	GO:0045862	BAG2, SPON1, F12, ROCK2, CTSH, CLEC3B, RAD23A, PPM1F, LRRK2, ARRB1, FBLN1, STAT3, KLKB1, SH3D19, S100A9, CLU, PACSIN3, ARL6IP5, ARIH2, APOE, AGER, RGN, UACA, MAPK3, CASP1, HIP1, SNCA, CUL3, CAV1, PICALM, PTK2	31	0.0033	0.0403	0.139469
GO:0031639	GO:0031639	Plasminogen activation	ENR	GO:0031639	FGG, FGB, KLKB1, FGA	4	0.0037	0.0452	0.134486

## Sheet: ION_DRUG_STIMULI
GO Term	Enrichment Map Name	GS_DESCR	GS_Type	Formatted name	Genes	GS_SIZE	p-value	Enrichment FDR q-value	NES
GO:0042592	GO:0042592	Homeostatic process	ENR	GO:0042592	CMA1, HBZ, VCL, ATP6V1E1, NAPSA, CTSH, FABP4, LAMC1, RMDN3, CAV2, MPO, PDGFRB, SLC1A1, SLC4A1, LCAT, LTF, CP, APOB, STAT3, APOA1, ADD1, ICAM1, LRP1, PRKAR2A, APOE, ESAM, TJP1, GPD1L, GJA1, CA2, MAPK3, NPTN, AZGP1, SLMAP, BDH2, KNG1, AQP3, HPX, CFL2, CKB, EPB42, PRDX2, ITPR1, AHSP, PRKACA, CD34, ANK3, AQP1, LPCAT1, CYBRD1, HK3, TENC1, C7, FABP5, FBN1, LRRK2, LIPA, F2, PLG, SGCD, PTPN11, NEO1, CDH5…	131	2.5e-08	1.17e-06	0.593181
GO:0055114	GO:0055114	Oxidation-reduction process	ENR	GO:0055114	ALDH1A2, CYP27A1, GNAS, GMPR, P4HA2, BLVRA, CYB5R3, PCYOX1, ALDH2, PKLR, MPO, EPX, CYB5A, PYCR2, CYB5R1, MAOB, BLVRB, CP, P4HA3, APOA1, CAT, ALDH3A2, BPGM, GLUD1, ACAT1, ERO1L, GPD1L, IVD, ACAA2, PGM2, MECP2, ECHDC1, BDH2, QDPR, ALDH1A1, RPIA, ALDH6A1, PRDX2, POR, ADH1B, HSD17B4, ADH1C, HPGD, PANK2, CRYL1, CYBRD1, HK3, SLC25A14, ALOX5AP, GPD1, DERA, ADSL, CYP51A1, PYGM, FASN, AOX1, MAOA, ACOT8, O…	85	3.35e-08	1.54e-06	0.581248
GO:0010035	GO:0010035	Response to inorganic substance	ENR	GO:0010035	ARG1, FABP4, PKLR, CLIC4, MPO, PDGFRB, CYB5A, MAOB, APOB, ADD1, CAT, ICAM1, GUCY1B3, COL18A1, FBP1, MMP9, SCGB1A1, ANXA1, MB, CA2, MAPK3, CD9, DNM2, QDPR, AQP3, DDI2, PRDX2, IQGAP1, AHCYL1, TF, CAPN2, ALAD, ANK3, AQP1, CRYAB, GDI1, CYBRD1, ANXA11, ALOX5AP, LRRK2, FGB, FGA, C1QA, DMTN, PON1, HBA1, PRKAA1, ALOX15, ATP2B4, APOA4, HBB, FGG, SNCA, SOD3, CAV1, HP, HVCN1	57	6.67e-08	2.9e-06	0.55376
GO:0010959	GO:0010959	Regulation of metal ion transport	ENR	GO:0010959	TF, PRKACA, ANK2, ANK3, DYSF, STOM, GNAI2, PDGFRB, ANO6, F2, ICAM1, FLNA, VAMP2, AHNAK, PACSIN3, ACTN2, FHL1, ACTN4, EPB41, CXCL12, LGALS3, GPD1L, RGN, GJA1, EHD3, ATP2B4, MYLK, FKBP1A, PKP2, DNM2, SPTBN4, DMD, SNCA, AGT, SLMAP, CAV1, UTRN, CTNNB1, WFS1, SERPINE2, DIAPH1, CLIC2, GSTO1, AHCYL1	44	4.89e-07	1.75e-05	0.475696
GO:0034762	GO:0034762	Regulation of transmembrane transport	ENR	GO:0034762	ANK2, ACTB, CLIC4, RAP1A, FLNA, C3, ARL6IP5, ACSL5, MMP9, FHL1, ACTN4, GPD1L, RGN, GJA1, CLIC3, FKBP1A, CA2, SCN7A, DNM2, SLMAP, UTRN, DIAPH1, SLC2A1, CACNA2D2, APPL1, AHCYL1, PRKACA, ANK3, DYSF, STOM, SORBS1, FABP5, ANO6, F2, CLIC5, VAMP2, PTPN11, AHNAK, ACTN2, YES1, OCLN, EHD3, ATP2B4, ITLN1, DMD, SNCA, AGT, CAV1, GALNT8, CLIC2, HVCN1, GSTO1	52	8.79e-06	0.00024	0.361979
GO:0010817	GO:0010817	Regulation of hormone levels	ENR	GO:0010817	ADH1C, ALDH1A2, GNAS, CMA1, RBP4, LTBP4, CTSG, PSMD9, CES1, FAM129B, UGT1A7, BCAT2, ARRB1, CHST9, SERPINA7, FGB, FGA, TTR, MME, LRP1, ENPEP, RAP1A, RAB8B, PTPN11, SNX4, GLUD1, STX4, SULT1A1, GJA1, ANXA1, ALDH9A1, HSD17B11, AKR1B10, HLA-DRB1, ACE, ACE2, FGG, AGT, CPA3, CRYM, PRKCA, ALDH1A1, SLC2A1, CACNA2D2, ITPR1, POR, ADH1B, HSD17B4	48	2.67e-05	0.00067	0.317393
GO:0043270	GO:0043270	Positive regulation of ion transport	ENR	GO:0043270	ANK2, ANK3, FABP3, PDGFRB, ANO6, APOA1, F2, FLNA, ACSL5, ACTN2, SNX4, FHL1, APOE, STXBP1, ACTN4, CXCL12, LGALS3, GPD1L, RGN, EHD3, MYLK, PKP2, DNM2, ACE2, DMD, SNCA, AGT, CAV1, WFS1, GSTO1, AHCYL1	31	4.22e-05	0.001	0.3
GO:0001666	GO:0001666	Response to hypoxia	ENR	GO:0001666	RPS27A, CAPN2, ALAD, AQP1, CRYAB, PSMD9, ENG, PDLIM1, PKLR, ADSL, PSMF1, CAT, ICAM1, CARD16, MMP2, LIMD1, ACTN4, ERO1L, CXCL12, AGER, PRKAA1, MB, ACAA2, RGCC, PTGIS, S100B, SOD3, MECP2, CAV1, AQP3, LMNA, SLC2A1, ITPR1, PIN1	34	9.45e-05	0.0021	0.267778
GO:0042445	GO:0042445	Hormone metabolic process	ENR	GO:0042445	ADH1C, ALDH1A2, SULT1A1, CMA1, RBP4, CTSG, ALDH9A1, CES1, UGT1A7, HSD17B11, AKR1B10, ACE, ACE2, CHST9, CRYM, CPA3, TTR, ALDH1A1, MME, ENPEP, PTPN11, ADH1B, HSD17B4	23	0.00013	0.0027	0.256864
GO:0002028	GO:0002028	Regulation of sodium ion transport	ENR	GO:0002028	ACTN4, ANK3, GPD1L, STOM, ATP2B4, PKP2, DNM2, SPTBN4, DMD, AGT, SLMAP, UTRN, SERPINE2, AHCYL1	14	0.00014	0.0029	0.25376
GO:0034764	GO:0034764	Positive regulation of transmembrane transport	ENR	GO:0034764	ANK2, ACTN4, ANK3, RGN, SORBS1, OCLN, EHD3, CA2, ANO6, DNM2, ITLN1, DMD, SNCA, AGT, F2, RAP1A, FLNA, C3, PTPN11, APPL1, ACSL5, GSTO1, ACTN2	23	0.00032	0.006	0.222185
GO:0050801	GO:0050801	Ion homeostasis	ENR	GO:0050801	ANK2, ATP6V1H, ATP6V1E1, FABP3, RMDN3, CLIC4, CAV2, TGM2, CD55, SLC4A1, LTF, CP, APOA1, S100A9, SLC34A2, LRP1, FHL1, APOE, SYNPO, ERO1L, CXCL12, GPD1L, RGN, GJA1, CA2, MAPK3, NPTN, SCN7A, SLMAP, PICALM, BDH2, KNG1, HPX, CKB, EPB42, ITPR1, SAA1, TF, PRKACA, PLCD1, ANK3, CYBRD1, C7, CD36, LRRK2, F2, SGCD, NEO1, CDH5, PRKAA1, ANXA6, ELANE, ATP2B4, DCN, SNCA, AGT, CAV1, WFS1, S100A14, GSTO1	60	0.00046	0.008	0.209691
GO:0015701	GO:0015701	Bicarbonate transport	ENR	GO:0015701	SLC4A1, AQP1, HBA1, CA2, CA3, CA1, CA4, HBB, CYB5R1	9	0.00047	0.0081	0.209151
GO:0009628	GO:0009628	Response to abiotic stimulus	ENR	GO:0009628	GMPR, ENG, PKLR, MPO, PDGFRB, PPL, CAT, ICAM1, COL18A1, LIMD1, SYNPO, ACTN4, ERO1L, CXCL12, AGER, GJA1, ANXA1, MB, ACAA2, MYLK, CA2, GNAQ, MAPK3, AKAP12, NPTN, ARHGEF2, CD9, CASP1, DNM2, S100B, MECP2, AQP3, IVL, SERPINE2, SLC2A1, ITPR1, RPS27A, CAPN2, PRKACA, ALAD, AQP1, DYSF, CRYAB, PSMD9, DAG1, PDLIM1, ADIRF, CIRBP, HRAS, ARRB1, SCEL, ADSL, PSMF1, MME, ZAK, PTPN11, CARD16, PALM, MMP2, RELB, ABH…	80	0.00053	0.009	0.204576
GO:0051597	GO:0051597	Response to methylmercury	ENR	GO:0051597	ARG1, S100B, ANK2, ALAD	4	0.001	0.016	0.179588
GO:0015711	GO:0015711	Organic anion transport	ENR	GO:0015711	AQP1, APOC1, FABP4, FABP3, APOC2, CD36, CA4, SLC1A1, FABP5, CYB5R1, ANO6, SLC4A1, MID1IP1, SLC27A3, APOA1, VAMP2, ARL6IP5, APOE, STXBP1, NPC2, HBA1, GJA1, ANXA1, CA2, APOA4, CA1, PITPNA, HBB, ACE, ACE2, LLGL2, SLC1A6, APOA2, APOC3, SLC2A1, CA3, SLC7A6	37	0.0023	0.0311	0.150724
GO:0002831	GO:0002831	Regulation of response to biotic stimulus	ENR	GO:0002831	ARG1, PRKACA, SERPING1, HLA-F, IFIT1, PSMD9, LBP, CD36, CD55, HRAS, LTF, JAK1, HRG, PSMF1, PTPN11, CARD16, FCN1, RELB, APOE, VSIG4, HLA-E, A2M, PAK2, TMEM173, MAPK3, HMGB4, MUC5B, USP15, HMGB2, PRKCA, HPX, PRDX2, APPL1	33	0.0029	0.0365	0.143771
GO:0042493	GO:0042493	Response to drug	ENR	GO:0042493	AQP1, ENG, FABP3, APOC2, PPM1F, ARRB1, ITGA3, ABCA3, APOA1, CAD, APOD, S100A10, RAP1A, COL18A1, FBP1, ANXA1, ADAM10, PFAS, TIMP2, ENO3, QDPR, HMGB2, CTNNB1, APOA2, POR	25	0.0031	0.0387	0.141229
GO:0071241	GO:0071241	Cellular response to inorganic substance	ENR	GO:0071241	TF, ALAD, ANK3, AQP1, PRKAA1, ALOX15, FABP4, CLIC4, MAPK3, ALOX5AP, LRRK2, DNM2, SNCA, ADD1, GUCY1B3, DMTN, DDI2, FBP1, IQGAP1, HVCN1, MMP9	21	0.0033	0.041	0.138722
GO:0009410	GO:0009410	Response to xenobiotic stimulus	ENR	GO:0009410	SCGB1A1, SULT1A1, AOC3, CES1, CYB5R3, UGT1A7, AKR7A2, ACAA1, EPHX1, S100A12, GSTM3, GSTO1, POR, SULT1A2	14	0.0038	0.0454	0.134294

## Sheet: IMMUNE_RESPONSE
GO Term	Enrichment Map Name	GS_DESCR	GS_Type	Formatted name	Genes	GS_SIZE	p-value	Enrichment FDR q-value	NES
GO:0016192	GO:0016192	Vesicle-mediated transport	ENR	GO:0016192	RALA, STK10, UNC13D, VCL, CTSG, LBP, F9, CTSH, EHD4, TGFB1, PLIN3, CAV2, MPO, EPX, VTN, LTA4H, EXOC2, LTF, HRG, APOB, PRTN3, APOA1, TTR, CAT, LRP1, MYH2, C3, CD93, C16ORF62, ESYT2, SNX4, APOE, BST2, ACTN4, EXOC4, LGALS3, DYNC1LI2, ORM1, ADAM10, VWF, VPS13C, ITGA2B, COTL1, TIMP2, MAPK3, A1BG, PACSIN2, EHD2, SPTBN4, CD81, CUL3, F13A1, ANXA3, BST1, KNG1, AMBP, ANK1, HPX, ITIH4, TIMP3, BIN2, IQGAP1, …	237	4.28e-45	5.49e-41	4.02604
GO:0002443	GO:0002443	Leukocyte mediated immunity	ENR	GO:0002443	STK10, UNC13D, VCL, CTSG, CTSH, MPO, EPX, C4A, LTA4H, LTF, C9, C6, PRTN3, TTR, CAT, ICAM1, C3, CD93, C16ORF62, BST2, LGALS3, ORM1, ADAM10, COTL1, TIMP2, A1BG, ACE, CD81, ANXA3, BST1, BIN2, IQGAP1, SERPING1, LPCAT1, STOM, PDXK, HK3, PPBP, C7, CAMP, APEH, FABP5, LRG1, C2, F2, C4BPA, VAMP2, CLU, C1S, C1R, C1QB, PLEKHO2, AP2A2, TMEM173, CFD, ACAA1, HBB, HLA-DRB1, RHOG, ANXA2, LRMP, VAT1, HP, PIGR, DY…	109	4.8e-28	3.85e-25	2.44145
GO:0002376	GO:0002376	Immune system process	ENR	GO:0002376	STK10, GYPC, UNC13D, VCL, HLA-F, CTSG, LBP, CTSH, TGFB1, MPO, EPX, VTN, LTA4H, LTF, C9, HRG, C6, APOB, PRTN3, TTR, CAT, LRP1, MYH2, C3, CD93, C16ORF62, LAMP3, BST2, LGALS3, DYNC1LI2, ORM1, ADAM10, COTL1, TIMP2, MAPK3, A1BG, CD81, ANXA3, BST1, KNG1, BIN2, IQGAP1, FCN3, BTN3A1, SERPING1, LPCAT1, STOM, CD109, PDXK, HK3, PPBP, CAMP, APEH, FABP5, LRG1, FGB, FGA, SCG2, F2, FASN, PLG, RAB8B, VAMP2, SDC2…	243	1.71e-27	1.22e-24	2.39136
GO:0030449	GO:0030449	Regulation of complement activation	ENR	GO:0030449	CPN1, SERPING1, C8B, CPN2, C7, CD55, VTN, C4A, C9, C6, C4B, CD5L, C1QC, C2, F2, C1QA, C4BPA, C3, CLU, C1S, C1R, CFH, VSIG4, CFB, C5, C8G, A2M, C1QB, C8A, CD81, PROS1, CFI, CD59, C4BPB	34	5.7e-23	2.36e-20	1.96271
GO:0006959	GO:0006959	Humoral immune response	ENR	GO:0006959	CTSG, CD55, C4A, LTF, C9, HRG, C6, PRTN3, S100A12, S100A9, PGLYRP2, C3, FCN1, SFTPD, CXCL12, VWA1, LGALS3, C8A, CD81, BST1, CFI, KNG1, FCN3, SERPING1, C8B, PPBP, C7, CAMP, C4B, FGB, FGA, C1QC, C2, F2, C1QA, RARRES2, C4BPA, CLU, C1S, C1R, CFH, VSIG4, CFB, HLA-E, C5, C8G, C1QB, ELANE, RGCC, CFD, HLA-DRB1, ITLN1, APCS, C4BPB, NOTCH2	55	3.03e-17	4.75e-15	1.43233
GO:0009605	GO:0009605	Response to external stimulus	ENR	GO:0009605	RALA, UNC13D, HLA-F, CTSG, LBP, TGFB1, MPO, EPX, LTF, C9, HRG, C6, APOB, PRTN3, APOA1, CAT, LAMC2, LRP1, C3, APOE, BST2, ACAT1, LGALS3, COTL1, HMCN1, MAPK3, RALB, SPTBN4, SAA4, ANXA3, KNG1, CA3, BIN2, FCN3, CAPN2, SERPING1, HPGD, PPBP, CAMP, LRRK2, LRG1, SCEL, FGB, FGA, SCG2, F2, DPYSL2, CLU, APOL1, STX4, C1QB, TMEM173, CFD, ITLN1, SNCA, TRIM25, CAV1, RHOG, ZYX, PTK2, HP, SPTBN1, ARG1, NEXN, MYO1…	199	2.39e-16	3.38e-14	1.34711
GO:0002682	GO:0002682	Regulation of immune system process	ENR	GO:0002682	STK10, UNC13D, HLA-F, CTSG, LBP, CTSH, TGFB1, VTN, C4A, LTF, C9, HRG, C6, STAT3, APOA1, ICAM1, MYH2, C3, FBXO7, HLA-DPB1, SNX4, APOE, BST2, SCGB1A1, CBFB, MYL9, VWA1, LGALS3, ORM1, ADAM10, ITGA2B, CA2, MAPK3, HMGB4, ACE, CD81, MUC5B, USP15, BST1, HMGB2, COL1A2, AMBP, AQP3, HPX, PRDX2, APPL1, FCN3, BTN3A1, PRKACA, SERPING1, CD34, CPN2, C7, MMP28, FBN1, LRRK2, C2, F2, PSMF1, C4BPA, PTPN11, CLU, C1S…	147	7.22e-16	9.37e-14	1.30283
GO:0045087	GO:0045087	Innate immune response	ENR	GO:0045087	ARG1, UNC13D, HLA-F, MYO1C, IFIT1, F12, LBP, TRIM21, CD55, C4A, LTF, C9, JAK1, C6, S100A12, S100A9, ICAM1, PGLYRP2, AQP4, C3, EVL, FCN1, SFTPD, HLA-DPB1, BST2, STXBP1, VWA1, LGALS3, AGER, ANXA1, FLNB, C8A, ARHGEF2, CASP1, S100B, HMGB2, CFI, COLEC12, CDC42, FCN3, SAA1, GBP6, SERPING1, GBP4, C8B, VIM, C7, CAMP, CNPY3, NCAM1, STXBP2, C4B, FGB, FGA, C1QC, C2, C1QA, RARRES2, C4BPA, CLU, C1S, C1R, PPP1…	83	3.65e-13	3.53e-11	1.04522
GO:0050778	GO:0050778	Positive regulation of immune response	ENR	GO:0050778	ACTB, HLA-F, MYO1C, CTSG, RFTN1, LBP, TGFB1, CD55, C4A, C9, STX7, HRG, C6, RAP1A, MYH2, C3, FCN1, HLA-DPB1, SNX4, STXBP1, VWA1, ANXA1, MAPK3, HMGB4, C8A, CD81, MUC5B, HMGB2, CFI, HPX, CDC42, FCN3, BTN3A1, PRKACA, SERPING1, PSMD9, C8B, C7, CD36, HRAS, C4B, C1QC, C2, PSMF1, C1QA, C4BPA, CLU, C1S, C1R, RELB, CFH, STX4, TNFSF13, VSIG4, CFB, HLA-E, C5, C8G, YES1, C1QB, ELANE, PAK2, TMEM173, RGCC, CFD,…	69	1.78e-10	1.24e-08	0.790658
GO:0002526	GO:0002526	Acute inflammatory response	ENR	GO:0002526	SERPINF2, F12, AHSG, LBP, ORM1, ELANE, ORM2, ANO6, SAA4, GIG25, STAT3, SERPINA1, KLKB1, F2, SERPINC1, ICAM1, APOA2, APCS, ITIH4, HP, HPR, SAA1	22	2.06e-10	1.42e-08	0.784771
GO:0009719	GO:0009719	Response to endogenous stimulus	ENR	GO:0009719	ATP6V1E1, CTSH, IPO5, TGFB1, CAV2, LTBP2, PDGFRB, APOB, STAT3, EPB41L5, APOA1, CAD, CAT, ICAM1, LRP1, PRKAR2A, ACAT1, SCGB1A1, PXN, DYNC1LI2, GJA1, CDH13, VPS13C, CA2, TIMP2, CGN, GNAQ, MAPK3, S100B, CD81, ANXA3, USP15, QDPR, HMGB2, COL1A2, LIMS1, TIMP3, IQGAP1, APPL1, RPS27A, CAPN2, PRKACA, GDF10, AQP1, LTBP4, HPGD, ROCK2, DENND4C, CLEC3B, FBN1, LRRK2, GPD1, ABCA3, FGB, CTNNA1, RAB8B, VAMP2, PTP…	123	7.65e-10	4.84e-08	0.731515
GO:0006957	GO:0006957	Complement activation, alternative pathway	ENR	GO:0006957	VSIG4, CFB, C9, C5, C8G, C8B, C3, C7, CFD, C8A, CFH	11	2.11e-09	1.23e-07	0.691009
GO:1901700	GO:1901700	Response to oxygen-containing compound	ENR	GO:1901700	ALDH1A2, CMA1, ATP6V1E1, CTSG, MMP13, LBP, CTSH, IPO5, TGFB1, CAV2, MPO, PDGFRB, APOB, STAT3, CAD, CAT, ICAM1, LRP1, GUCY1B3, PRKAR2A, APOE, SCGB1A1, PXN, GJA1, VPS13C, CA2, GNAQ, MAPK3, CASP1, QDPR, HMGB2, COL1A2, AQP3, CA3, PRDX2, IQGAP1, APPL1, CAPN2, PRKACA, AQP1, GNAI2, HPGD, ROCK2, PPBP, DENND4C, COL6A2, FBN1, LRRK2, GPD1, CTNNA1, RAB8B, VAMP2, HBA1, PRKAA1, ATP2B4, APOA4, AKR1B10, HBB, MSN…	127	5.9e-09	3.1e-07	0.650864
GO:0050727	GO:0050727	Regulation of inflammatory response	ENR	GO:0050727	CMA1, CALCRL, F12, AHSG, LBP, FABP4, TGM2, ACP5, LRRK2, VPS35, STAT3, KLKB1, S100A12, APOA1, S100A9, F2, APOD, PGLYRP2, C3, MGLL, SNX4, ABHD12, APOE, SCGB1A1, CDH5, HLA-E, AGER, ALOX15, ANXA1, ELANE, TMEM173, HLA-DRB1, CASP1, PTGIS, ACE2, CD81, SNCA, AGT, ZYX, BST1, DNASE1L3, APCS, APPL1, NT5E, SAA1	45	1.18e-08	5.81e-07	0.623582
GO:1901699	GO:1901699	Cellular response to nitrogen compound	ENR	GO:1901699	ARG1, GNAS, ACTB, ATP6V1H, ATP6V1E1, IFIT1, IPO5, PKLR, SNX6, CAV2, FLOT1, AGRN, STAT3, ICAM1, LRP1, RAP1A, GUCY1B3, FLNA, PRKAR2A, PXN, AGER, GJA1, CA2, GNAQ, MAPK3, RALB, ARHGEF2, DNM2, COL6A1, COL1A2, DIAPH1, DDI2, COLEC12, APPL1, AHCYL1, POR, CAPN2, PRKACA, AQP1, GNAI2, ROCK2, SORBS1, VIM, DENND4C, CD36, FBN1, LRRK2, GPD1, RARRES2, CTNNA1, RAB8B, DMTN, VAMP2, COL4A1, MMP2, ACTN2, PRKAA1, ATP2…	65	4.43e-08	1.99e-06	0.570115
GO:0006954	GO:0006954	Inflammatory response	ENR	GO:0006954	UNC13D, F12, LBP, TGFB1, ATRN, C4A, STAT3, CD5L, KLKB1, S100A12, S100A9, ICAM1, LRP1, C3, MGLL, HSPG2, AGER, ORM1, GJA1, ANXA1, SAA4, GIG25, HMGB2, KNG1, ITIH4, PRDX2, SAA1, AHSG, ORM2, PPBP, CD36, CAMP, ANO6, C4B, SERPINA1, LIPA, SCG2, F2, C1QA, RARRES2, CLU, HPR, RELB, C5, SERPINF2, AOC3, ALOX15, ELANE, HLA-DRB1, SNCA, SERPINC1, APOA2, APCS, HP, NOTCH2	55	8.96e-08	3.78e-06	0.542251
GO:0002250	GO:0002250	Adaptive immune response	ENR	GO:0002250	ARG1, SERPING1, UNC13D, RFTN1, C8B, CTSH, C7, CD55, HRAS, C4A, C9, C6, C4B, STAT3, FGB, FGA, C1QC, C2, C1QA, ICAM1, C4BPA, C3, CLU, C1S, C1R, HLA-DPB1, RELB, LAMP3, HLA-E, C5, C8G, ANXA1, C1QB, C8A, HLA-DRB1, CD81, CFI, APCS, C4BPB, BTN3A1	40	1.12e-07	4.62e-06	0.533536
GO:0009617	GO:0009617	Response to bacterium	ENR	GO:0009617	ARG1, NEXN, CTSG, LBP, FABP4, TGFB1, MPO, EPX, MAOB, LTF, APOB, S100A12, S100A9, ICAM1, PGLYRP2, C3, SFTPD, SCGB1A1, RAB14, GJA1, HMCN1, MAPK3, AKAP12, SCN7A, CASP1, ANXA3, HMGB2, CA3, PRDX2, COLEC12, TF, CAPN2, GBP6, ALAD, GBP4, GNG12, HPGD, VIM, PPBP, CD36, CAMP, ACP5, LRG1, C4B, FGB, FGA, F2, RARRES2, C4BPA, CARD16, HLA-E, MRC1, ELANE, RPS6KA3, DCN, HLA-DRB1, SNCA, CAV1, HP, C4BPB, S100A14, NO…	62	2.41e-07	9.17e-06	0.503763
GO:0050900	GO:0050900	Leukocyte migration	ENR	GO:0050900	GYPC, CD34, LBP, TGFB1, PPBP, EPX, ANO6, ITGA3, ADD2, APOB, PRTN3, S100A12, S100A9, SCG2, F2, ICAM1, PLG, PTPN11, SDC2, SFTPD, ESAM, CXCL12, LGALS3, PECAM1, ANXA1, ITGA1, YES1, ELANE, GYPA, MSN, CD99, SBDS, CAV1, PROS1, COL1A2, ROCK1, CDC42, SLC7A6, SAA1	39	2.7e-07	1.02e-05	0.49914
GO:1901652	GO:1901652	Response to peptide	ENR	GO:1901652	ARG1, GNAS, PRKACA, ATP6V1H, ATP6V1E1, MMP13, DAG1, ROCK2, SORBS1, VIM, FABP3, DENND4C, PKLR, SNX6, CD36, CAV2, FBN1, GNAI1, STAT3, CAD, RARRES2, CAT, ICAM1, LRP1, RAB8B, PRKAR2A, VAMP2, MMP2, ACTN2, MMP9, PXN, CXCL12, AGER, GJA1, ANXA1, VPS13C, CA2, ARHGEF2, AGT, CAV1, PTK2, QDPR, SLC2A1, ROCK1, IQGAP1, APPL1, AHCYL1, POR	48	2.6e-06	8.06e-05	0.409366
GO:0002685	GO:0002685	Regulation of leukocyte migration	ENR	GO:0002685	STK10, DYSF, LBP, MMP28, ANO6, APOD, RARRES2, ICAM1, C5, CXCL12, LGALS3, AGER, ANXA1, ADAM10, ELANE, ITGA2B, MAPK3, EMILIN1, CD9, MSN, CD99, CD81, RHOG, PTK2, PLVAP, BST1, S100A14, MPP1	28	3.17e-06	9.69e-05	0.401368
GO:0045916	GO:0045916	Negative regulation of complement activation	ENR	GO:0045916	VSIG4, SERPING1, A2M, CD59, C4BPA, C4BPB, CD55	7	4.78e-06	0.00014	0.385387
GO:0034341	GO:0034341	Response to interferon-gamma	ENR	GO:0034341	GBP6, GBP4, HLA-F, MYO1C, TRIM21, VIM, NCAM1, STXBP2, JAK1, ICAM1, AQP4, EVL, HLA-DPB1, STX4, BST2, STXBP1, HLA-E, MRC1, FLNB, HLA-DRB1, CASP1, SNCA, TRIM25, ZYX, CDC42	25	7.15e-06	0.0002	0.369897
GO:0051702	GO:0051702	Interaction with symbiont	ENR	GO:0051702	APOE, AQP1, CTSG, STOM, ELANE, CAV2, CAMP, SUGT1, LTF, HRG, F2, ANXA2, PLG, PC, APCS, SFTPD, APOL1	17	8.25e-06	0.00023	0.363827
GO:0044403	GO:0044403	Symbiotic process	ENR	GO:0044403	ATP6V1H, IFIT1, CTSG, IPO5, KPNA3, CAV2, CD55, SUGT1, LTF, HRG, STAT3, ICAM1, PGLYRP2, CD93, SFTPD, APOE, FDPS, CXCL12, CTNND1, EXOC1, MAPK3, GYPA, ACE2, CD81, USP15, COPS7A, CFI, AMBP, PDCD6IP, DYNC1I2, HPX, IQGAP1, CDC42, RPS27A, AQP1, STOM, NFIA, DAG1, ROCK2, VIM, RAD23A, CAMP, NCAM1, VPS35, FBLN1, F2, C1QA, PLG, ACOT8, TLN1, CHMP6, APOL1, CFH, HLA-E, MRC1, RPS17, ELANE, PAK2, AP2A2, TMEM173, …	71	1.16e-05	0.00031	0.350864
GO:0006026	GO:0006026	Aminoglycan catabolic process	ENR	GO:0006026	GPC2, LUM, HSPG2, CSPG4, TGFB1, IDS, OGN, DCN, CTBS, AGRN, PRELP, PGLYRP2, SDC2, BGN	14	1.39e-05	0.00037	0.34318
GO:0007568	GO:0007568	Aging	ENR	GO:0007568	ARG1, SERPING1, CRYAB, ENG, DAG1, MPO, PDGFRB, HRAS, LRRK2, STAT3, PRELP, APOD, C1QA, CAT, ICAM1, MME, LRP1, CTNNA1, ERO1L, AGER, ILK, RGN, TIMP2, COL4A2, MAPK3, DCN, AGT, ENO3, PICALM, LIMS1	30	5e-05	0.0012	0.292082
GO:0019730	GO:0019730	Antimicrobial humoral response	ENR	GO:0019730	HLA-E, CXCL12, LGALS3, CTSG, ELANE, PPBP, CAMP, ITLN1, LTF, HRG, FGB, PRTN3, FGA, S100A12, S100A9, KNG1, F2, RARRES2, PGLYRP2, CLU, SFTPD	21	6.83e-05	0.0016	0.279588
GO:0002698	GO:0002698	Negative regulation of immune effector process	ENR	GO:0002698	ARG1, VSIG4, BST2, SERPING1, HLA-E, LGALS3, HLA-F, A2M, ANXA1, TGFB1, CD55, APOA1, APOA2, CD59, PGLYRP2, C4BPA, C4BPB, APPL1	18	7.73e-05	0.0017	0.276955
GO:0060326	GO:0060326	Cell chemotaxis	ENR	GO:0060326	C5, CXCL12, LGALS3, LBP, ENG, ANXA1, ITGA1, PPBP, PDGFRB, HMGB4, ANO6, SBDS, SAA4, RHOG, DOCK4, PARVA, S100A12, S100A9, HMGB2, SCG2, NRP1, BIN2, SFTPD, SAA1	24	0.0001	0.0022	0.265758
GO:0014070	GO:0014070	Response to organic cyclic compound	ENR	GO:0014070	ARG1, ALDH1A2, GNAS, ACTB, IFIT1, RFTN1, ENG, CES1, TGFB1, PKLR, PDGFRB, FLOT1, MAOB, GNAI1, HBE1, APOB, STAT3, CAD, CAT, ICAM1, RAP1A, FLNA, ACAT1, SCGB1A1, STXBP1, LUM, GJA1, ANXA1, CA2, GNAQ, MAPK3, RALB, DNM2, S100B, ANXA3, HMGB2, AQP3, DIAPH1, COLEC12, CPN1, PRKACA, ALAD, AQP1, CRYAB, HPGD, DAG1, ROCK2, CD36, EPHX1, LRRK2, GPD1, ABCA3, CTNNA1, DMTN, PRKAA1, PAK2, NR3C1, ATP2B4, TMEM173, APOA…	69	0.00015	0.0032	0.249485
GO:0033993	GO:0033993	Response to lipid	ENR	GO:0033993	ARG1, ALDH1A2, GNAS, RBP4, CTSG, LBP, ENG, CES1, CTSH, FABP3, TGFB1, MPO, PDGFRB, MAOB, GNAI1, APOB, STAT3, CAD, CAT, ICAM1, SCGB1A1, STXBP1, GJA1, ANXA1, CA2, MAPK3, AKAP12, CASP1, S100B, ANXA3, HMGB2, AQP3, PRDX2, CPN1, CAPN2, ALAD, AQP1, CRYAB, GNG12, HPGD, DAG1, ROCK2, VIM, PPBP, CD36, ACP5, ABCA3, CARD16, PON1, MRC1, PRKAA1, YES1, ELANE, NR3C1, RPS6KA3, DCN, MSN, SNCA, AGT, TRIM25, CAV1, CTN…	65	0.00024	0.0046	0.233724
GO:0050832	GO:0050832	Defense response to fungus	ENR	GO:0050832	LTF, HRG, CTSG, S100A12, S100A9, RARRES2, ELANE, COTL1, CAMP, MPO	10	0.00024	0.0047	0.23279
GO:0001906	GO:0001906	Cell killing	ENR	GO:0001906	UNC13D, CXCL12, LGALS3, CTSG, CTSH, ELANE, PPBP, CAMP, STXBP2, LTF, C9, HRG, S100A12, KNG1, F2, C3, APOL1	17	0.00024	0.0047	0.23279
GO:0042742	GO:0042742	Defense response to bacterium	ENR	GO:0042742	GBP6, GBP4, CTSG, LBP, PPBP, CD36, CAMP, MPO, ACP5, EPX, LTF, FGB, FGA, S100A12, S100A9, F2, RARRES2, PGLYRP2, SFTPD, RAB14, HLA-E, ELANE, ANXA3, HMGB2, HP, S100A14, COLEC12, NOTCH2	28	0.0003	0.0056	0.225181
GO:0030099	GO:0030099	Myeloid cell differentiation	ENR	GO:0030099	AHSP, TF, PIP4K2A, CBFB, HBZ, CD109, PAFAH1B1, MB, HLA-DRB1, SLC4A1, CD81, PRTN3, CTNNB1, ADD1, ANXA2, FASN, DMTN, PTPN11, EPB42, BPGM, NOTCH2, CDC42, RELB, MMP9	24	0.00031	0.0057	0.224413
GO:0050920	GO:0050920	Regulation of chemotaxis	ENR	GO:0050920	STX4, DYSF, C5, CXCL12, AGER, LBP, ADAM10, CDH13, ELANE, TGFB1, MMP28, PDGFRB, MAPK3, ANO6, PPM1F, SEMA3B, HRG, PTK2, BST1, SCG2, RARRES2, NRP1, S100A14, MPP1	24	0.00034	0.0063	0.220066
GO:0002683	GO:0002683	Negative regulation of immune system process	ENR	GO:0002683	ARG1, SERPING1, HLA-F, TGFB1, MMP28, CD55, FBN1, LTF, APOA1, C1QC, APOD, PGLYRP2, C4BPA, PDE5A, FBXO7, SFTPD, VSIG4, BST2, SCGB1A1, CBFB, HLA-E, C5, CXCL12, LGALS3, A2M, ALOX15, ANXA1, EMILIN1, HLA-DRB1, CLDN18, CTNNB1, AMBP, APOA2, CD59, APCS, C4BPB, PRDX2, APPL1, PAWR	39	0.00041	0.0074	0.213077
GO:0032496	GO:0032496	Response to lipopolysaccharide	ENR	GO:0032496	ARG1, CAPN2, ALAD, GNG12, CTSG, LBP, HPGD, VIM, TGFB1, PPBP, CD36, MPO, ACP5, MAOB, APOB, ICAM1, CARD16, SCGB1A1, MRC1, GJA1, ELANE, MAPK3, RPS6KA3, DCN, AKAP12, CASP1, SNCA, HMGB2, S100A14, PRDX2	30	0.00042	0.0075	0.212494
GO:0035722	GO:0035722	interleukin-12-mediated signaling pathway	ENR	GO:0035722	MSN, RALA, JAK1, ANXA2, PAK2, CA1, PITPNA, GSTO1, CDC42	9	0.00082	0.013	0.188606
GO:0052428	GO:0052428	Modulation by host of symbiont molecular function	ENR	GO:0052428	ANXA2, APCS, SFTPD, SUGT1	4	0.001	0.016	0.179588
GO:1903510	GO:1903510	Mucopolysaccharide metabolic process	ENR	GO:1903510	B4GALT2, LUM, ITIH2, CSPG4, TGFB1, IDS, OGN, DCN, ITIH1, CHST9, ITIH3, PRELP, ITIH4, BGN	14	0.0012	0.0179	0.174715
GO:0019882	GO:0019882	Antigen processing and presentation	ENR	GO:0019882	HLA-E, HLA-F, DYNC1LI2, RFTN1, PSMD9, CTSH, AP2A2, DCTN1, CD36, AP2B1, HLA-DRB1, ACE, DNM2, AZGP1, PSMF1, ICAM1, DYNC1I2, RAB8B, ACTR1A, DYNC1H1, HLA-DPB1, RELB	22	0.0014	0.02	0.169897
GO:1903659	GO:1903659	Regulation of complement-dependent cytotoxicity	ENR	GO:1903659	CD5L, CD59, CD55, CFH	4	0.0015	0.022	0.165758
GO:1905521	GO:1905521	Regulation of macrophage migration	ENR	GO:1905521	CD81, C5, PTK2, RARRES2, MMP28, MAPK3, EMILIN1, CD9	8	0.0016	0.0232	0.163451
GO:0052372	GO:0052372	Modulation by symbiont of entry into host	ENR	GO:0052372	EXOC2, TRIM25, CAV1, TRIM21, APCS, FCN1, FCN3, HLA-DRB1	8	0.0016	0.0232	0.163451
GO:0002699	GO:0002699	Positive regulation of immune effector process	ENR	GO:0002699	STX4, TNFSF13, ARG1, STXBP1, HLA-E, UNC13D, RBP4, HLA-F, LBP, ANXA1, TGFB1, CD36, MAPK3, STXBP2, CD81, STX7, C6, USP15, RAP1A, HPX, C3, SNX4	22	0.0017	0.0237	0.162525
GO:0044409	GO:0044409	Entry into host	ENR	GO:0044409	MRC1, DAG1, CTNND1, KPNA3, CAV2, GYPA, CD55, ACE2, NCAM1, CD81, CAV1, CTNNB1, ICAM1	13	0.0022	0.0292	0.153462
GO:0002719	GO:0002719	Negative regulation of cytokine production involved in immune response	ENR	GO:0002719	ARG1, BST2, HLA-F, APOA1, APOA2, TGFB1	6	0.0023	0.0306	0.151428
GO:0050729	GO:0050729	Positive regulation of inflammatory response	ENR	GO:0050729	HLA-E, F12, LBP, FABP4, TGM2, LRRK2, CD81, SNCA, AGT, STAT3, KLKB1, S100A12, S100A9, C3, APPL1, SNX4	16	0.0024	0.0313	0.150446
GO:0051092	GO:0051092	Positive regulation of nf-kappab transcription factor activity	ENR	GO:0051092	RPS27A, AGER, TRIM21, CD36, FLOT1, ARHGEF2, LTF, AGT, TRIM25, CAV1, STAT3, S100A12, S100A9, CAT, ICAM1, CARD16, CLU	17	0.0024	0.0316	0.150031
GO:0044273	GO:0044273	Sulfur compound catabolic process	ENR	GO:0044273	ACAT1, LUM, CSPG4, PRELP, IDS, PCYOX1, OGN, DCN, BGN	9	0.0024	0.0318	0.149757
GO:0007159	GO:0007159	Leukocyte cell-cell adhesion	ENR	GO:0007159	MSN, STK10, ADD2, PECAM1, S100A9, ICAM1, APOA4, ROCK1, NT5E	9	0.0024	0.0318	0.149757
GO:0031664	GO:0031664	Regulation of lipopolysaccharide-mediated signaling pathway	ENR	GO:0031664	LTF, PRKCA, CARD16, CD36, PRDX2, CD55	6	0.0027	0.0351	0.145469
GO:0002886	GO:0002886	Regulation of myeloid leukocyte mediated immunity	ENR	GO:0002886	STX4, ARG1, STXBP1, STXBP2, HLA-E, UNC13D, DNASE1L3, C3, SNX4	9	0.003	0.0377	0.142366
GO:0051873	GO:0051873	Killing by host of symbiont cells	ENR	GO:0051873	HRG, CTSG, F2, ELANE, CAMP, APOL1	6	0.0032	0.0398	0.140012
GO:0042129	GO:0042129	Regulation of t cell proliferation	ENR	GO:0042129	ARG1, VSIG4, SCGB1A1, HLA-E, LGALS3, AGER, ANXA1, CD55, HLA-DRB1, CD81, SPTA1, CTNNB1, EFNB1, PDE5A, SFTPD, HLA-DPB1, PAWR	17	0.0036	0.0439	0.135754

## Sheet: TISSUE_ORGANIZATION
GO Term	Enrichment Map Name	GS_DESCR	GS_Type	Formatted name	Genes	GS_SIZE	p-value	Enrichment FDR q-value	NES
GO:0009987	GO:0009987	Cellular process	ENR	GO:0009987	RALA, STK10, UNC13D, VCL, CTSG, LBP, F9, CTSH, EHD4, TGFB1, PLIN3, CAV2, MPO, EPX, VTN, LTA4H, EXOC2, LTF, HRG, APOB, PRTN3, APOA1, TTR, CAT, LRP1, MYH2, C3, CD93, C16ORF62, ESYT2, SNX4, APOE, BST2, ACTN4, EXOC4, LGALS3, DYNC1LI2, ORM1, ADAM10, VWF, VPS13C, ITGA2B, COTL1, TIMP2, MAPK3, A1BG, PACSIN2, EHD2, SPTBN4, CD81, CUL3, F13A1, ANXA3, BST1, KNG1, AMBP, ANK1, HPX, ITIH4, TIMP3, BIN2, IQGAP1, …	847	1.56e-32	2.23e-29	2.86517
GO:0040012	GO:0040012	Regulation of locomotion	ENR	GO:0040012	STK10, VCL, LBP, CTSH, TGFB1, PDGFRB, VTN, PPM1F, HRG, STAT3, EPB41L5, MCAM, LAMC2, ICAM1, LRP1, NRP1, FBXO7, APOE, BST2, ACTN4, LGALS3, TJP1, GJA1, ADAM10, CDH13, ITGA2B, MAPK3, ACE, CD81, ANXA3, BST1, IQGAP1, APPL1, GNAI2, ROCK2, MAPRE2, MMP28, LRRK2, VPS35, FBLN1, SCG2, PODN, PLG, CTNNA1, NISCH, GLIPR2, SYNPO2, STX4, CDH5, ATP2B4, LRRC16A, LIMCH1, MSN, AGT, CAV1, PLXNA2, RHOG, PTK2, LAMA3, ARH…	127	2.76e-23	1.18e-20	1.99281
GO:0009653	GO:0009653	Anatomical structure morphogenesis	ENR	GO:0009653	RALA, UNC13D, VCL, MMP13, CTSH, TGFB1, POF1B, VTN, ATRN, LTF, HRG, APOB, EPB41L5, MCAM, LAMC2, LRP1, APOE, EXOC4, PXN, CDH11, CDH13, MAPK3, PACSIN2, SPTBN4, ABLIM1, CD81, CUL3, IQGAP1, CAPN2, ANK3, COL6A3, CD109, HPGD, COL14A1, COL6A2, LRRK2, SCG2, CTNNA1, DPYSL2, SDC2, CLU, SERPINF2, CSPG4, PITPNA, CAV1, RHOG, PTK2, LAMA3, CTNNB1, FLII, ANXA2, COL12A1, SPTBN1, ARG1, ANK2, ACTB, MRPL40, NEXN, MYH…	201	7.94e-20	1.67e-17	1.67773
GO:0000902	GO:0000902	Cell morphogenesis	ENR	GO:0000902	VCL, LAMC1, LAMB2, POF1B, EPB41L5, ADD1, LAMC2, LRP1, NRP1, GAS7, PXN, VWA1, CDH11, GJA1, CDH13, ITGA1, FLNB, MAPK3, PACSIN2, NPTN, SPTBN4, S100B, CUL3, EPB42, PEAK1, IQGAP1, SZT2, ANK3, COL6A3, COL14A1, FARP1, COL6A2, LRRK2, NCAM1, PARVA, LIPA, DPYSL2, PTPN11, SDC2, CLU, NEO1, FERMT2, EPB41L3, CDH5, PITPNA, PLXNA2, RHOG, PTK2, CTNNB1, COL12A1, SPTBN1, ACTB, NEXN, MYH10, FAM129B, CLIC4, FLOT1, AG…	98	7.76e-19	1.51e-16	1.5821
GO:0034330	GO:0034330	Cell junction organization	ENR	GO:0034330	ANK2, ACTB, VCL, SNCG, MYH10, LAMC1, TGFB1, DCTN1, LAMB2, POF1B, DNM3, ADD2, AGRN, PRTN3, LAMC2, NRP1, FLNA, APOE, SYNPO, SPARCL1, ACTN4, ESAM, TJP1, ILK, CDH11, GJA1, ADAM10, CDH13, CTNND1, DSP, NPTN, CD9, MECP2, UTRN, PRKCA, PLXNB2, LIMS1, PDCD6IP, PEAK1, CACNA2D2, TLN2, CDC42, ANK3, NFIA, SORBS1, NUMB, FARP1, LRRK2, VPS35, ITGA3, C1QC, TNS1, C1QA, CTNNA1, TLN1, PALM, COL4A1, FERMT2, ACTN2, DST…	77	4.19e-18	7.38e-16	1.51319
GO:0022603	GO:0022603	Regulation of anatomical structure morphogenesis	ENR	GO:0022603	CMA1, UNC13D, CTSH, TGFB1, HRG, C6, STAT3, APOA1, ICAM1, LRP1, NRP1, C3, LIMD1, APOE, ACTN4, TJP1, GJA1, ADAM10, ARHGDIA, DDAH1, FGD5, FMNL2, EHD2, S100B, RNH1, ANXA3, LIMS1, EPB42, CAPN2, CD34, AQP1, HSPB6, ROCK2, PALM2, LRRK2, VPS35, LRG1, FBLN1, FGB, SH3D19, FGA, PARVA, F2, PSMF1, DPYSL2, SDC2, PALM, FERMT2, EPB41L3, CDH5, EPN2, EPB41, PHLDB1, ASPN, AP2A2, ATP2B4, LRRC16A, MSN, FGG, AGT, PLXNA…	119	4.46e-16	5.97e-14	1.3224
GO:0022607	GO:0022607	Cellular component assembly	ENR	GO:0022607	VCL, EHD4, TGFB1, KPNA3, CAV2, POF1B, VTN, C9, APOB, APOA1, TUBB4A, LAMC2, DNAH5, APOE, ACTN4, PXN, CDH11, ADAM10, CDH13, MAPK3, PACSIN2, EHD2, ABLIM1, CUL3, BIN2, RPS27A, ANK3, MAPRE2, LRRK2, VPS35, LSM3, FGB, FGA, CTNNA1, SYNPO2, VAMP2, CLU, TLN1, CHMP6, DST, STX4, CSPG4, PAK2, EHD3, TMEM173, LRRC16A, SMC1A, HIP1, ITLN1, FGG, PLEC, SNCA, CAV1, RHOG, ZYX, PTK2, LAMA3, CTNNB1, FLII, ANXA2, FLNC, …	200	9.21e-16	1.18e-13	1.29281
GO:0048513	GO:0048513	Animal organ development	ENR	GO:0048513	MMP13, CTSH, TGFB1, CAV2, VTN, ATRN, LTF, PRTN3, EPB41L5, APOA1, CAT, LAMC2, LRP1, NID1, COL5A3, DNAH5, ACAT1, LUM, EXOC4, ADAM10, MAPK3, ABLIM1, CD81, CUL3, ANXA3, QDPR, PDLIM3, IQGAP1, COL6A3, LPCAT1, CD109, HPGD, COL14A1, COPS2, CLEC3B, COL6A2, LRRK2, EVPL, SCEL, FASN, PLG, CTNNA1, DPYSL2, B4GALT2, TNS3, PDLIM2, MYO1D, C1QB, CAV1, PTK2, LAMA3, CTNNB1, ANXA2, COL12A1, BGN, ARG1, ANK2, ACTB, EML…	240	2.39e-13	2.32e-11	1.06345
GO:0090066	GO:0090066	Regulation of anatomical structure size	ENR	GO:0090066	TMOD2, MYO1C, MACF1, TMOD1, PRKG1, ADD2, SPTA1, FAM49A, ADD1, BAIAP2L2, ICAM1, LRP1, AQP4, NRP1, MYADM, EVL, APOE, SPTAN1, ESAM, CXCL12, ILK, GJA1, PAFAH1B1, ITGA1, COTL1, RDX, TRIOBP, ACE, DNM2, ACE2, SPTBN4, PICALM, DOCK4, KNG1, SPG20, CFL2, ROCK1, AQP1, ROCK2, GDI1, ANO6, LRRK2, KANK3, SEMA3B, FGB, FGA, CLASP2, DPYSL2, DMTN, ACTN2, SPTB, SERPINF2, ALOX15, ADD3, LRRC16A, ELN, MSN, FGG, AGT, CAV…	66	4.67e-12	3.9e-10	0.940894
GO:0009888	GO:0009888	Tissue development	ENR	GO:0009888	RALA, ALDH1A2, MYH11, PGM5, VCL, MMP13, CTSH, LAMC1, TGFB1, TMOD1, LAMB2, CAV2, PDGFRB, NPNT, POF1B, VTN, ATRN, EPB41L5, PBX1, CAT, LAMC2, ICAM1, NRP1, ACAT1, LUM, EXOC4, VWA1, LGALS3, TJP1, GJA1, FLNB, CA2, MAPK3, TAGLN, CD81, BDH2, COL1A2, CFL2, IQGAP1, PRKACA, TPPP3, CD34, COL6A3, KANK2, CD109, COL14A1, COPS2, CLEC3B, COL6A2, FN3K, FABP5, EVPL, SCEL, FASN, PLG, SGCD, ANXA6, ASPN, ELN, HLA-DRB1…	150	5.93e-12	4.89e-10	0.931069
GO:0120036	GO:0120036	Plasma membrane bounded cell projection organization	ENR	GO:0120036	VCL, EHD4, LAMB2, PDGFRB, APOA1, TUBB4A, LAMC2, LRP1, NRP1, GAS7, DNAH5, APOE, RAB23, CDH11, GJA1, CDH13, ITGA1, FGD5, MAPK3, NPTN, EHD2, SPTBN4, ABLIM1, S100B, IQGAP1, SZT2, PRKACA, ANK3, FARP1, LRRK2, NCAM1, PARVA, CTNNA1, DPYSL2, PTPN11, SDC2, NEO1, EPB41L3, CSPG4, PAK2, EHD3, LRRC16A, PITPNA, DMD, PLXNA2, RHOG, PTK2, CTNNB1, DYNC1H1, SPTBN1, ACTB, NEXN, MYH10, FAM129B, DCTN1, PRKG1, CROCC, FL…	108	1.39e-11	1.09e-09	0.896257
GO:1901888	GO:1901888	Regulation of cell junction assembly	ENR	GO:1901888	PRKACA, VCL, MYO1C, ROCK2, CORO1C, MACF1, FLOT1, PDLIM5, PPM1F, VPS35, AGRN, HRG, EPB41L5, CLASP2, APOD, S100A10, LRP1, RAP1A, NRP1, DMTN, CBFB, TJP1, GJA1, OCLN, LIMCH1, ACE, ACE2, SNCA, AGT, CAV1, PTK2, LIMS1, ROCK1, PEAK1, SLK, IQGAP1, TPBG	37	3.2e-11	2.47e-09	0.86073
GO:1902904	GO:1902904	Negative regulation of supramolecular fiber organization	ENR	GO:1902904	TMOD2, CRYAB, TMOD1, KANK3, ADD2, MID1IP1, SPTA1, CLASP2, TUBB4A, ADD1, MYADM, DMTN, CLU, ARAP1, APOE, SPTAN1, CDH5, SPTB, HSPG2, TJP1, PAK2, ADD3, RDX, TRIOBP, EMILIN1, ARHGEF2, SPTBN4, SNCA, LMOD1, CGNL1, SPTBN1	31	4.66e-11	3.57e-09	0.844733
GO:0061061	GO:0061061	Muscle structure development	ENR	GO:0061061	TMOD2, ANK2, MYH11, PGM5, MYH10, ENG, TGFB1, TMOD1, CAV2, PDGFRB, NPNT, SGCE, SORBS2, FHL1, MYLK, FKBP1A, FLNB, DSP, TAGLN, CD9, QKI, CD81, MECP2, LAMA2, UTRN, CFL2, PDLIM3, CACNA2D2, EMD, CAPN2, COL6A3, DYSF, CRYAB, DAG1, PDLIM1, COPS2, MYH14, PDLIM5, FHL3, SMTN, PLG, SGCD, ACTN2, NEBL, PDLIM2, ITGA8, ELN, DCN, PKP2, DMD, AGT, CAV1, SYNE1, LMOD1, CTNNB1, CSRP1, FLII, LAMA5, LMNA, FLNC	60	9.61e-11	6.9e-09	0.816115
GO:0048869	GO:0048869	Cellular developmental process	ENR	GO:0048869	VCL, TGFB1, CAV2, POF1B, VTN, PRTN3, EPB41L5, APOA1, CAT, LAMC2, LRP1, C3, APOE, PXN, LGALS3, RTN1, CDH11, ADAM10, ARHGDIA, TIMP2, MAPK3, PACSIN2, SPTBN4, CD81, CUL3, IQGAP1, GPC2, CAPN2, ANK3, COL6A3, CD109, COL14A1, COPS2, COL6A2, FN3K, LRRK2, EVPL, LRG1, SCEL, MRC2, F2, FASN, PLG, CTNNA1, DPYSL2, SDC2, CLU, CSPG4, A2M, PAK2, PITPNA, DIAPH2, HIP1, FGG, CAV1, RHOG, PTK2, LAMA3, CTNNB1, FLII, ANX…	259	1.26e-10	8.91e-09	0.805012
GO:0045216	GO:0045216	Cell-cell junction organization	ENR	GO:0045216	ANK2, ACTB, VCL, NUMB, TGFB1, POF1B, PRTN3, CTNNA1, TLN1, EPB41L3, CDH5, ACTN4, ESAM, TJP1, PECAM1, CDH11, GJA1, ADAM10, CDH13, OCLN, PAK2, CTNND1, DSP, PKP2, CD9, CLDN18, MLLT4, CTNNB1, PRKCA, NUMBL, LIMS1, PDCD6IP, TLN2, CDC42	34	1.4e-10	9.81e-09	0.800833
GO:0006936	GO:0006936	Muscle contraction	ENR	GO:0006936	TMOD2, ANK2, MYH11, DYSF, CRYAB, VCL, ROCK2, SYNM, SORBS1, VIM, DTNA, TMOD1, MYH14, SMTN, DES, SGCD, MYH2, TLN1, ACTN2, PXN, MYL9, GPD1L, GJA1, ITGA1, TPM2, MB, ATP2B4, MYLK, SORBS3, PKP2, SCN7A, CALD1, DMD, SNTB1, AGT, SLMAP, UTRN, LMOD1, ROCK1, EMD	40	2.31e-10	1.58e-08	0.780134
GO:0030834	GO:0030834	Regulation of actin filament depolymerization	ENR	GO:0030834	TMOD2, SPTAN1, SPTB, ADD3, TMOD1, RDX, LRRC16A, TRIOBP, SPTBN4, ADD2, SPTA1, LMOD1, ADD1, CFL2, DMTN, DSTN, ACTN2, SPTBN1	18	9.56e-10	5.97e-08	0.722403
GO:0033036	GO:0033036	Macromolecule localization	ENR	GO:0033036	VCL, ATP6V1E1, LBP, FABP4, EHD4, IPO5, TGFB1, KPNA3, PLIN3, LTBP2, NPNT, SLC4A1, EXOC2, LCAT, APOB, STAT3, APOA1, CAT, LRP1, NRP1, FBXO7, C16ORF62, ESYT2, SNX4, APOE, LAMP3, ACTN4, ESAM, EXOC4, TJP1, RAB23, GJA1, VPS13C, PACSIN2, EHD2, ACE, SPTBN4, CD81, AZGP1, SLMAP, LIMS1, ANK1, APPL1, BTN3A1, SZT2, RPS27A, ANK3, APOC1, SSR2, ABCA8, ROCK2, MAPRE2, DENND4C, FABP5, FBN1, LRRK2, VPS35, ABCA3, MID1…	183	1.25e-09	7.67e-08	0.71152
GO:0003013	GO:0003013	Circulatory system process	ENR	GO:0003013	ANK2, CMA1, CTSG, ENG, CES1, CYB5R3, TGFB1, PRKG1, ICAM1, ENPEP, GUCY1B3, APOE, CXCL12, TJP1, GPD1L, GJA1, ITGA1, SNX5, DDAH1, AKAP12, ACE, ACE2, MECP2, CPA3, DOCK4, KNG1, COL1A2, ROCK1, CDC42, SERPING1, CD34, TJP2, ROCK2, CD36, FABP5, FGB, FGA, SGCD, MME, NISCH, CDH5, SERPINF2, YES1, OCLN, ELN, PKP2, HBB, FGG, DMD, AGT, CAV1, PLOD3	52	1.74e-09	1.03e-07	0.698716
GO:0061564	GO:0061564	Axon development	ENR	GO:0061564	ACTB, VCL, NEXN, MYH10, FAM129B, LAMB2, FLOT1, AGRN, SPTA1, APOA1, APOD, LAMC2, LRP1, NRP1, EVL, SPTAN1, STXBP1, ATL1, CXCL12, CDH11, PAFAH1B1, MAPK3, NPTN, SPTBN4, S100B, LAMA2, PICALM, PRKCA, PLXNB2, SZT2, ANK3, CRTAC1, DAG1, NUMB, NCAM1, SEMA3B, LYPLA2, CTNNA1, DPYSL2, EFNB1, PTPN11, NEO1, SPTB, PITPNA, PLXNA2, RHOG, PTK2, NUMBL, MATN2, VASP, NOTCH2, SPTBN1	52	2.72e-09	1.55e-07	0.680967
GO:0006935	GO:0006935	Chemotaxis	ENR	GO:0006935	RALA, NEXN, LBP, MYH10, ENG, FAM129B, LAMB2, PDGFRB, AGRN, HRG, SPTA1, S100A12, APOA1, S100A9, LAMC2, LRP1, NRP1, EVL, SFTPD, SPTAN1, CXCL12, LGALS3, ANXA1, ITGA1, MAPK3, HMGB4, NPTN, SPTBN4, SAA4, LAMA2, DOCK4, HMGB2, PRKCA, PLXNB2, BIN2, SAA1, DAG1, PPBP, HRAS, ANO6, NCAM1, SEMA3B, PARVA, LYPLA2, SCG2, RARRES2, DPYSL2, EFNB1, PTPN11, NEO1, SPTB, C5, SBDS, SERPIND1, PLXNA2, RHOG, PTK2, MATN2, VA…	61	3.59e-09	2.01e-07	0.66968
GO:0001885	GO:0001885	Endothelial cell development	ENR	GO:0001885	TJP1, TJP2, PECAM1, ENG, CLIC4, RDX, MSN, MLLT4, CTNNB1, PLOD3, ICAM1, FASN, RAP1A, MYADM, COL18A1, GSTM3	16	1.59e-08	7.63e-07	0.611748
GO:0044057	GO:0044057	Regulation of system process	ENR	GO:0044057	ANK2, GNAS, PRKG1, NPNT, SLC1A1, APOA1, ICAM1, FLNA, PDE5A, MGLL, APOE, MYL9, AGER, GPD1L, GJA1, SNX5, DSP, ACE, ACE2, SPTBN4, S100B, MECP2, UTRN, DOCK4, PRKCA, ROCK1, CACNA2D2, ITPR1, AHCYL1, PRKACA, AQP1, CALCRL, GNAI2, DAG1, HSPB6, ROCK2, PPP1R12B, FABP5, LRRK2, FGB, DES, LMCD1, FGA, RAB8B, PTPN11, EPB41, ANXA6, EHD3, ATP2B4, APOA4, PKP2, FGG, DMD, AGT, CAV1, CNN1, PTK2, APOA2, LMNA, CLIC2, GS…	62	2.58e-08	1.2e-06	0.592082
GO:0015669	GO:0015669	Gas transport	ENR	GO:0015669	HBG1, HBM, HBZ, AQP1, HBE1, HBA1, HBG2, HBD, MB, CA2, HBB	11	3.59e-08	1.63e-06	0.578781
GO:0072359	GO:0072359	Circulatory system development	ENR	GO:0072359	ALDH1A2, ANK2, MYH11, RBP4, MYH10, ENG, TGFB1, CLIC4, PDGFRB, SLC1A1, HRG, APOB, MCAM, CAD, APOD, LRP1, ENPEP, NRP1, COL18A1, SORBS2, DNAH5, APOE, HSPG2, ILK, GJA1, CDH13, MB, CLEC14A, MYLK, FKBP1A, DSP, COL4A2, MAPK3, DNM2, QKI, PRKCA, COL1A2, PDLIM3, ROCK1, CDC42, CD34, PLCD1, DYSF, CALCRL, HPGD, DAG1, ROCK2, PDLIM1, MMRN2, FBN1, PDLIM5, ITGA3, PARVA, SCG2, PLG, SGCD, PTPN11, COL4A1, MMP2, ACTN…	80	5.17e-08	2.28e-06	0.564207
GO:0051094	GO:0051094	Positive regulation of developmental process	ENR	GO:0051094	CMA1, UNC13D, CTSH, TGFB1, PDGFRB, NPNT, LTF, C6, APOB, STAT3, APOA1, ADD1, LRP1, NRP1, C3, APOE, CBFB, TJP1, GJA1, ARHGDIA, DDAH1, CA2, TIMP2, NPTN, EHD2, SPTBN4, S100B, ANXA3, HMGB2, LIMS1, IQGAP1, GPC2, CAPN2, CD34, AQP1, HSPB6, VPS35, LRG1, FGB, FGA, CTNNA1, GLIPR2, TNFSF13, CDH5, SERPINF2, PHLDB1, PRKAA1, LRRC16A, HLA-DRB1, FGG, DMD, AGT, PLXNA2, CTNNB1, LMNA, PAWR, TPBG, GNAS, ENG, FAM129B,…	112	6.77e-08	2.94e-06	0.553165
GO:0048646	GO:0048646	Anatomical structure formation involved in morphogenesis	ENR	GO:0048646	TMOD2, RALA, ALDH1A2, ANK2, GNAS, MYH11, PGM5, UNC13D, RBP4, MYH10, ENG, TGFB1, TMOD1, CLIC4, TGM2, PDGFRB, VTN, HRG, EPB41L5, MCAM, APOD, ENPEP, NRP1, COL18A1, MMP9, EXOC4, HSPG2, ILK, PAFAH1B1, CDH13, CLEC14A, FKBP1A, COL4A2, MAPK3, CD9, CD81, COL6A1, CUL3, PRKCA, PLXNB2, THBS3, CFL2, CDC42, CAPN2, PRKACA, CD34, PLCD1, DYSF, CALCRL, CD109, DAG1, MMRN2, ITGA3, PARVA, SCG2, PTPN11, COL4A1, MMP2, …	80	8.41e-08	3.58e-06	0.544612
GO:0035633	GO:0035633	Maintenance of blood-brain barrier	ENR	GO:0035633	CDH5, ESAM, ACTB, VCL, TJP1, TJP2, PECAM1, GJA1, OCLN, LAMC1, SLC1A1, DMD, LAMA2	13	9.67e-08	4.05e-06	0.539254
GO:0045765	GO:0045765	Regulation of angiogenesis	ENR	GO:0045765	CMA1, CD34, AQP1, ENG, HSPB6, ROCK2, FAM129B, CTSH, MMRN2, JAK1, AGO1, HRG, C6, LRG1, STAT3, FBLN5, NRP1, KIAA1462, C3, CDH5, EPN2, HSPG2, TJP1, ANXA1, DDAH1, ATP2B4, COL4A2, RGCC, DCN, EMILIN1, PTGIS, RRAS, RNH1, AGT, MECP2, ANXA3, CTNNB1, PRKCA, ROCK1	39	1.01e-07	4.23e-06	0.537366
GO:0001894	GO:0001894	Tissue homeostasis	ENR	GO:0001894	TF, GNAS, CD34, ACTB, RBP4, VCL, LPCAT1, TJP2, NAPSA, CTSH, LAMC1, CROCC, PDGFRB, ACP5, SLC1A1, LTF, LIPA, ADD1, PTPN11, SFTPD, CDH5, ESAM, TJP1, PECAM1, GJA1, OCLN, DMD, AZGP1, GIG25, LAMA2, CTNNB1, PIGR	32	1.13e-07	4.63e-06	0.533442
GO:0072001	GO:0072001	Renal system development	ENR	GO:0072001	ALDH1A2, CD34, RBP4, COL4A4, NFIA, KANK2, HPGD, CTSH, TENC1, LAMB2, PDGFRB, NPNT, FBN1, LRRK2, ITGA3, PBX1, CAT, MME, NID1, ENPEP, NRP1, COL4A1, ACAT1, ILK, PECAM1, RGN, ITGA8, PODXL, CA2, DCN, ACE, AGT, CTNNB1, LAMA5, WFS1, NOTCH2, IQGAP1	37	1.19e-07	4.84e-06	0.531515
GO:0034332	GO:0034332	Adherens junction organization	ENR	GO:0034332	CDH5, ACTB, VCL, TJP1, CDH11, ADAM10, CDH13, NUMB, PAK2, CTNND1, DSP, MLLT4, CTNNB1, NUMBL, CTNNA1, CDC42	16	3.1e-07	1.17e-05	0.493181
GO:0055001	GO:0055001	Muscle cell development	ENR	GO:0055001	TMOD2, ANK2, MYH11, PGM5, DYSF, NEBL, MYH10, ENG, TMOD1, CAV2, PDGFRB, PDLIM5, DMD, AGT, LMOD1, CSRP1, FLII, SGCD, CFL2, LMNA, FLNC, SORBS2, CACNA2D2, ACTN2	24	6.04e-07	2.11e-05	0.467572
GO:0003081	GO:0003081	Regulation of systemic arterial blood pressure by renin-angiotensin	ENR	GO:0003081	ACE, ACE2, CMA1, AGT, SERPINF2, CPA3, CTSG, CES1, MME, ENPEP	10	8.47e-07	2.88e-05	0.454061
GO:0035295	GO:0035295	Tube development	ENR	GO:0035295	ARG1, RALA, ALDH1A2, RBP4, ENG, CTSH, TGFB1, CLIC4, TGM2, PDGFRB, NPNT, SLC1A1, HRG, APOB, EPB41L5, MCAM, APOD, PBX1, CAT, LRP1, ENPEP, NRP1, COL18A1, SFTPD, APOE, ACAT1, HSPG2, ILK, GJA1, CDH13, CLEC14A, MYLK, COL4A2, MAPK3, QKI, PRKCA, PLXNB2, SERPINE2, CDC42, PRKACA, CD34, PLCD1, DYSF, CALCRL, NFIA, HPGD, DAG1, MMRN2, ITGA3, PARVA, LIPA, SCG2, RARRES2, SGCD, MME, COL4A1, MMP2, TNS3, SERPINF2, …	74	1.11e-06	3.68e-05	0.443415
GO:0001954	GO:0001954	Positive regulation of cell-matrix adhesion	ENR	GO:0001954	ILK, DAG1, CDH13, CD36, PPM1F, RRAS, HRG, UTRN, EPB41L5, S100A10, LIMS1, NRP1, ROCK1, IQGAP1	14	1.94e-06	6.14e-05	0.421183
GO:0071711	GO:0071711	Basement membrane organization	ENR	GO:0071711	CMA1, CAV1, LAMB3, DAG1, PLOD3, NID1, LAMB2, NID2, CAV2, COL4A1	10	2.13e-06	6.7e-05	0.417393
GO:0019835	GO:0019835	Cytolysis	ENR	GO:0019835	C9, C5, HRG, C6, C8G, C8B, F2, C7, CAMP, C8A, APOL1	11	3.59e-06	0.00011	0.395861
GO:0007044	GO:0007044	Cell-substrate junction assembly	ENR	GO:0007044	PLEC, LAMB3, LAMA3, SORBS1, TNS1, LAMC2, LAMC1, PEAK1, TLN1, FERMT2, ACTN2, DST	12	4.71e-06	0.00014	0.385387
GO:0007399	GO:0007399	Nervous system development	ENR	GO:0007399	TMOD2, RALA, ALDH1A2, CMA1, VCL, TGFB1, LAMB2, VTN, ATRN, ADD2, APOB, STAT3, BTD, APOA1, PBX1, LAMC2, LRP1, NRP1, GAS7, C3, FBXO7, DNAH5, APOE, GLUD1, ACAT1, RTN1, CDH11, GJA1, LSAMP, ADAM10, ITGA1, ARHGDIA, TIMP2, MAPK3, NPTN, SPTBN4, S100B, ANXA3, HMGB2, CKB, NDRG2, PCDH1, IQGAP1, SZT2, GPC2, PRKACA, ANK3, AQP1, COPS2, FARP1, LRRK2, NCAM1, VPS35, F2, CTNNA1, DPYSL2, PTPN11, SDC2, CLU, NEO1, PAL…	159	6.09e-06	0.00017	0.376955
GO:0048660	GO:0048660	Regulation of smooth muscle cell proliferation	ENR	GO:0048660	SERPINF2, ILK, CALCRL, GNAI2, GJA1, HPGD, CDH13, ELANE, PRKG1, TGM2, PDGFRB, OGN, ELN, IGFBP3, AGT, CNN1, CTNNB1, APOD, NDRG2, MMP2, MMP9	21	7.86e-06	0.00022	0.365758
GO:0003008	GO:0003008	System process	ENR	GO:0003008	TMOD2, MYH11, CMA1, VCL, CTSG, TGFB1, TMOD1, LAMB2, SLC4A1, MCAM, ICAM1, ENPEP, MYH2, GUCY1B3, PRKAR2A, APOE, LUM, PXN, MYL9, TJP1, GPD1L, GJA1, ITGA1, DDAH1, HMCN1, MAPK3, NPTN, ACE, SPTBN4, ABLIM1, S100B, AZGP1, EPS8L2, SLMAP, CPA3, KNG1, COL1A2, AQP3, TIMP3, PRKACA, SERPING1, CD34, ANK3, AQP1, GNAI2, ROCK2, DTNA, FABP5, LRRK2, SMTN, FGB, FGA, SGCD, NISCH, TLN1, B4GALT2, CDH5, SERPINF2, OCLN, A…	134	1.03e-05	0.00028	0.355284
GO:0009887	GO:0009887	Animal organ morphogenesis	ENR	GO:0009887	ARG1, ALDH1A2, GNAS, RBP4, MMP13, ENG, CTSH, SFTPB, LAMC1, TGFB1, LAMB2, TGM2, PDGFRB, NPNT, ATRN, NFIC, LTF, AGRN, STAT3, PBX1, LAMC2, NRP1, TMEM119, COL18A1, EVL, FHL1, EXOC4, HSPG2, VWA1, ILK, RAB23, MFAP5, PAFAH1B1, MYLK, FKBP1A, CA2, DSP, TRIOBP, MAPK3, ABLIM1, COL6A1, CUL3, LAMA2, COL1A2, THBS3, AQP3, CDC42, COL6A3, AQP1, DAG1, COL14A1, COL6A2, ACP5, HRAS, FBN1, LRRK2, PARVA, CTNNA1, MMP2, …	77	1.33e-05	0.00036	0.34437
GO:0003417	GO:0003417	Growth plate cartilage development	ENR	GO:0003417	COL6A1, COL6A3, VWA1, MMP13, ANXA6, COL14A1, COL12A1, THBS3, MATN2, COL6A2	10	1.61e-05	0.00042	0.337675
GO:0050808	GO:0050808	Synapse organization	ENR	GO:0050808	ACTB, ANK3, NFIA, SNCG, MYH10, FARP1, DCTN1, LAMB2, LRRK2, VPS35, DNM3, ITGA3, ADD2, AGRN, C1QC, C1QA, NRP1, PALM, COL4A1, APOE, SYNPO, SPARCL1, ADAM10, C1QB, NPTN, MECP2, UTRN, CTNNB1, PLXNB2, CACNA2D2, CDC42, PIN1	32	1.59e-05	0.00042	0.337675
GO:0001525	GO:0001525	Angiogenesis	ENR	GO:0001525	CD34, PLCD1, DYSF, CALCRL, ENG, DAG1, MMRN2, CLIC4, PDGFRB, HRG, PARVA, MCAM, SCG2, APOD, ENPEP, NRP1, COL18A1, COL4A1, MMP2, HSPG2, PECAM1, CSPG4, CDH13, CLEC14A, COL4A2, FAP, CAV1, PTK2, RASIP1, CTNNB1, PRKCA, ANXA2, NOTCH2, CDC42	34	2.11e-05	0.00055	0.325964
GO:0010927	GO:0010927	Cellular component assembly involved in morphogenesis	ENR	GO:0010927	TMOD2, ANK2, MYH11, PGM5, NEBL, ILK, MYH10, PAFAH1B1, TMOD1, PDGFRB, CD9, LMOD1, CSRP1, FLII, CFL2, ACTN2, EPB41L3	17	2.38e-05	0.00061	0.321467
GO:0060284	GO:0060284	Regulation of cell development	ENR	GO:0060284	UNC13D, VCL, FAM129B, MACF1, TGFB1, DNM3, LTF, STAT3, DPYSL3, APOA1, S100A9, ADD1, S100A10, PBX1, LRP1, RAP1A, NRP1, FLNA, MYADM, PDE5A, FBXO7, APOE, ACTN4, CXCL12, ILK, PAFAH1B1, ADAM10, ARHGDIA, TIMP2, TRIOBP, NPTN, ARHGEF2, DNM2, HMGB2, PLXNB2, LIMS1, SPG20, SERPINE2, ROCK1, IQGAP1, CDC42, GPC2, DAG1, ROCK2, GDI1, VIM, CORO1C, NUMB, FBN1, PDLIM5, LRRK2, SEMA3B, ITGA3, FBLN1, FGB, FGA, CLASP2, …	75	2.74e-05	0.00069	0.316115
GO:0060348	GO:0060348	Bone development	ENR	GO:0060348	GNAS, COL6A3, MMP13, ENG, COL14A1, COL6A2, ACP5, ANO6, LTF, PTPN11, TMEM119, PIP4K2A, VWA1, RAB23, GJA1, ANXA6, PAFAH1B1, SBDS, COL6A1, PAPSS2, ANXA2, COL12A1, THBS3, MATN2, BGN	25	2.8e-05	0.0007	0.31549
GO:0040007	GO:0040007	Growth	ENR	GO:0040007	GNAS, COL6A3, DYSF, VCL, MMP13, DAG1, COL14A1, COPS2, TENC1, COL6A2, CLIC4, LAMB2, PDGFRB, PDLIM5, EPB41L5, FBLN5, ADD1, APOD, PLG, PGLYRP2, NRP1, PTPN11, SORBS2, ARIH2, VWA1, ANXA6, ANXA1, CD9, SBDS, CD81, COL6A1, AGT, ENO3, CTNNB1, COL12A1, THBS3, MATN2, NOTCH2, IQGAP1	39	3.25e-05	0.0008	0.309691
GO:2000810	GO:2000810	Regulation of bicellular tight junction assembly	ENR	GO:2000810	PRKACA, CBFB, TJP1, MYO1C, GJA1, ROCK2, OCLN, ROCK1	8	5.11e-05	0.0012	0.292082
GO:0060537	GO:0060537	Muscle tissue development	ENR	GO:0060537	ALDH1A2, MYH11, PGM5, RBP4, MYH10, ENG, COPS2, TGFB1, CAV2, PDGFRB, MYH14, PDLIM5, SGCD, SORBS2, ACTN2, NEBL, ITGA8, MYLK, FKBP1A, FLNB, DSP, ELN, DCN, PKP2, AGT, CAV1, CSRP1, CFL2, LMNA, CDC42, EMD	31	7.16e-05	0.0016	0.279588
GO:1901889	GO:1901889	Negative regulation of cell junction assembly	ENR	GO:1901889	ACE, PTK2, CLASP2, ROCK2, APOD, CORO1C, LRP1, DMTN, ROCK1	9	6.95e-05	0.0016	0.279588
GO:0006937	GO:0006937	Regulation of muscle contraction	ENR	GO:0006937	PRKACA, ANK2, MYL9, CALCRL, ANXA6, HSPB6, EHD3, PRKG1, DSP, PPP1R12B, NPNT, PKP2, ACE2, DMD, CAV1, DOCK4, CNN1, FLNA, PDE5A, CLIC2, GSTO1	21	8.01e-05	0.0018	0.274473
GO:0007097	GO:0007097	Nuclear migration	ENR	GO:0007097	FHOD1, PTK2, MYH10, PAFAH1B1, DCTN1, ACTR1A, DYNC1H1, CDC42	8	8.3e-05	0.0019	0.272125
GO:0016525	GO:0016525	Negative regulation of angiogenesis	ENR	GO:0016525	EPN2, HSPG2, ROCK2, FAM129B, ATP2B4, MMRN2, COL4A2, RGCC, DCN, EMILIN1, AGT, AGO1, MECP2, HRG, CTNNB1, FBLN5, ROCK1	17	0.00011	0.0023	0.263827
GO:1990776	GO:1990776	Response to angiotensin	ENR	GO:1990776	AGT, CAV1, ROCK2, CA2, ROCK1, IQGAP1, AHCYL1, ACTN2	8	0.00013	0.0027	0.256864
GO:0048771	GO:0048771	Tissue remodeling	ENR	GO:0048771	ARG1, CSPG4, GJA1, TGFB1, TGM2, ACP5, ACE, AGT, CAV1, LIPA, CTNNB1, PLG, MMP2, NOTCH2, BGN	15	0.00013	0.0028	0.255284
GO:0043297	GO:0043297	Apical junction assembly	ENR	GO:0043297	CDH5, CLDN18, ACTN4, ESAM, VCL, PECAM1, MLLT4, OCLN, PDCD6IP, PAK2, CTNNA1, POF1B	12	0.0002	0.0041	0.238722
GO:1902991	GO:1902991	Regulation of amyloid precursor protein catabolic process	ENR	GO:1902991	APOE, SPON1, AGER, PICALM, ROCK2, FKBP1A, CLU, ROCK1, PIN1	9	0.00021	0.0042	0.237675
GO:0072006	GO:0072006	Nephron development	ENR	GO:0072006	ACAT1, CD34, COL4A4, ILK, PECAM1, PODXL, LAMB2, PDGFRB, NPNT, ITGA3, CTNNB1, PBX1, LAMA5, NID1, ENPEP, NOTCH2, IQGAP1	17	0.00024	0.0047	0.23279
GO:0097746	GO:0097746	Regulation of blood vessel diameter	ENR	GO:0097746	APOE, SERPINF2, GJA1, ITGA1, ROCK2, PRKG1, ACE, ACE2, FGG, AGT, CAV1, FGB, DOCK4, FGA, PLOD3, KNG1, ICAM1, ROCK1	18	0.00026	0.0049	0.23098
GO:0003014	GO:0003014	Renal system process	ENR	GO:0003014	PRKACA, GNAS, CD34, AQP1, SERPINF2, GNAI2, GJA1, HBB, SLC4A1, ITGA3, AGT, MCAM, WFS1, AQP3, AQP4, PRKAR2A	16	0.00027	0.0051	0.229243
GO:0007517	GO:0007517	Muscle organ development	ENR	GO:0007517	COL6A3, CRYAB, ENG, DAG1, COPS2, TGFB1, CAV2, MYH14, FHL3, SGCE, SMTN, SGCD, FHL1, MYLK, FKBP1A, FLNB, DSP, ELN, DCN, TAGLN, PKP2, DMD, CAV1, LAMA2, UTRN, LAMA5, CFL2, LMNA, EMD	29	0.00029	0.0055	0.225964
GO:1903522	GO:1903522	Regulation of blood circulation	ENR	GO:1903522	PRKACA, ANK2, SLC1A1, FGB, DES, FGA, ICAM1, FLNA, PDE5A, AGER, GPD1L, GJA1, EHD3, ATP2B4, DSP, PKP2, ACE, ACE2, SPTBN4, FGG, DMD, AGT, CAV1, DOCK4, CLIC2, CACNA2D2, ITPR1, GSTO1, AHCYL1	29	0.00031	0.0057	0.224413
GO:0035987	GO:0035987	Endodermal cell differentiation	ENR	GO:0035987	COL6A1, LAMB3, LAMA3, CTNNB1, COL12A1, COL4A2, MMP2, VTN, MMP9	9	0.00035	0.0064	0.219382
GO:0090557	GO:0090557	Establishment of endothelial intestinal barrier	ENR	GO:0090557	TJP1, TJP2, MLLT4, ICAM1, FASN	5	0.00038	0.0068	0.216749
GO:0031099	GO:0031099	Regeneration	ENR	GO:0031099	CXCL12, DYSF, RGN, ANXA1, DAG1, LAMB2, VTN, CD9, CD81, ENO3, ANXA3, APOA1, CAD, APOD, PLG, APOA2, CTNNA1, RAP1A, MATN2	19	0.00038	0.0069	0.216115
GO:0065003	GO:0065003	Protein-containing complex assembly	ENR	GO:0065003	ALDH1A2, MYH11, ATL3, EHD4, LAMC1, TGFB1, KPNA3, GCHFR, APOM, VTN, C9, ADD2, APOB, APOA1, TBCEL, AQP4, EVL, SLC9A3R2, DNAH5, APOE, STXBP1, PXN, ATL1, CXCL12, ADAM10, FKBP1A, MAPK3, CUL3, PICALM, COPS7A, HMGB2, COL1A2, CD59, PDCD6IP, DIAPH1, SLC2A1, BIN2, RPS27A, PRKACA, ALAD, TPPP3, CRYAB, APOC1, PSMD9, APOC2, APOC4, ALOX5AP, ANO6, LRRK2, MCM3, AGO1, MID1IP1, H2AFY2, FGB, SERPINA1, FGA, CLASP2, D…	89	0.00038	0.007	0.21549
GO:0014910	GO:0014910	Regulation of smooth muscle cell migration	ENR	GO:0014910	ACE, IGFBP3, AGT, ILK, DOCK4, LRP1, NRP1, PRKG1, PDGFRB, IQGAP1, VTN	11	0.0004	0.0072	0.214267
GO:0048729	GO:0048729	Tissue morphogenesis	ENR	GO:0048729	RALA, ALDH1A2, PRKACA, ACTB, COL6A3, VCL, ENG, DAG1, COL14A1, CTSH, TGFB1, COL6A2, CLIC4, TGM2, NPNT, ITGA3, EPB41L5, PBX1, NRP1, FLNA, COL4A1, EXOC4, VWA1, ILK, ITGA8, PAFAH1B1, PODXL, MYLK, FKBP1A, CA2, DSP, PKP2, MSN, COL6A1, RASIP1, LAMA3, CTNNB1, PLOD3, PLXNB2, LAMA5, COL12A1, MATN2, VASP, TGFB1I1, NOTCH2, CDC42	46	0.00041	0.0073	0.213668
GO:1903596	GO:1903596	Regulation of gap junction assembly	ENR	GO:1903596	ACE, ACE2, AGT, CAV1	4	0.00043	0.0076	0.211919
GO:1903010	GO:1903010	Regulation of bone development	ENR	GO:1903010	CLDN18, LTF, RGN, TMEM119, NOTCH2, POR, FBN1	7	0.00046	0.008	0.209691
GO:0003382	GO:0003382	Epithelial cell morphogenesis	ENR	GO:0003382	PECAM1, EPB41L5, PLOD3, FLNB, CLIC4, COL18A1, ROCK1, POF1B	8	0.00049	0.0085	0.207058
GO:0010611	GO:0010611	Regulation of cardiac muscle hypertrophy	ENR	GO:0010611	AGT, LMCD1, PTK2, PRKCA, ROCK2, ATP2B4, LMNA, PDE5A, ROCK1, PIN1	10	0.00054	0.0091	0.204096
GO:1902683	GO:1902683	Regulation of receptor localization to synapse	ENR	GO:1902683	STX7, DAG1, ADAM10, RAP1A, HRAS, NPTN	6	0.00055	0.0092	0.203621
GO:0043114	GO:0043114	Regulation of vascular permeability	ENR	GO:0043114	APOE, CDH5, TJP1, TJP2, YES1, DDAH1, OCLN, TGFB1, AKAP12	9	0.00062	0.0104	0.198297
GO:1902396	GO:1902396	Protein localization to bicellular tight junction	ENR	GO:1902396	CDH5, ACTN4, TJP1, FLNA	4	0.00069	0.0113	0.194692
GO:1905907	GO:1905907	Negative regulation of amyloid fibril formation	ENR	GO:1905907	APOE, HSPG2, CRYAB, CLU	4	0.00069	0.0113	0.194692
GO:1901890	GO:1901890	Positive regulation of cell junction assembly	ENR	GO:1901890	FLOT1, PPM1F, ACE2, AGT, AGRN, HRG, CAV1, EPB41L5, S100A10, LIMS1, NRP1, ROCK1, IQGAP1, TPBG	14	0.00072	0.0117	0.193181
GO:0001503	GO:0001503	Ossification	ENR	GO:0001503	GNAS, GDF10, MMP13, TGFB1, CLEC3B, ACP5, ANO6, LTF, MRC2, CAT, FASN, TMEM119, MMP2, LIMD1, CBFB, ALOX15, MGP, CDH11, ASPN, BCAP29, IGFBP3, SBDS, COL6A1, COL1A2, THBS3, HSD17B4	26	0.00072	0.0117	0.193181
GO:0021670	GO:0021670	Lateral ventricle development	ENR	GO:0021670	AQP1, MYH10, NUMBL, NUMB, DNAH5	5	0.00072	0.0117	0.193181
GO:0055013	GO:0055013	Cardiac muscle cell development	ENR	GO:0055013	MYH11, AGT, NEBL, MYH10, SGCD, LMNA, PDGFRB, SORBS2, ACTN2, PDLIM5	10	0.00078	0.0126	0.189963
GO:0098901	GO:0098901	Regulation of cardiac muscle cell action potential	ENR	GO:0098901	ANK2, ANK3, SLMAP, CAV1, FLNA, DSP, PKP2	7	0.00081	0.013	0.188606
GO:1901215	GO:1901215	Negative regulation of neuron death	ENR	GO:1901215	APOE, STXBP1, CD34, HLA-F, ILK, SNX6, AP2B1, HRAS, LRRK2, ARRB1, VPS35, SNCA, MECP2, STAT3, CTNNB1, NES, WFS1, LRP1, NRP1, FBXO7, ROCK1, PIN1	22	0.00087	0.0138	0.186012
GO:1904645	GO:1904645	Response to amyloid-beta	ENR	GO:1904645	AGER, MMP13, GJA1, ICAM1, LRP1, SNX6, CD36, MMP2, MMP9	9	0.0011	0.0163	0.178781
GO:0050873	GO:0050873	Brown fat cell differentiation	ENR	GO:0050873	ERO1L, LRG1, LAMB3, MB, FABP4, FABP3, ALDH6A1	7	0.0012	0.0174	0.175945
GO:0072010	GO:0072010	Glomerular epithelium development	ENR	GO:0072010	CD34, PECAM1, PODXL, LAMB2, NOTCH2, IQGAP1	6	0.0013	0.0194	0.17122
GO:1903140	GO:1903140	Regulation of establishment of endothelial barrier	ENR	GO:1903140	CDH5, VCL, ADD1, ROCK2, ROCK1	5	0.0016	0.0231	0.163639
GO:0034103	GO:0034103	Regulation of tissue remodeling	ENR	GO:0034103	TF, CLDN18, AGT, HRG, AGER, PRKCA, ROCK2, TGFB1, CA2, TMEM119, ROCK1	11	0.0019	0.027	0.156864
GO:0043129	GO:0043129	Surfactant homeostasis	ENR	GO:0043129	LPCAT1, NAPSA, CTSH, SFTPD	4	0.0021	0.0288	0.154061
GO:0048708	GO:0048708	Astrocyte differentiation	ENR	GO:0048708	S100B, STAT3, AGER, C1QA, VIM, LRP1, PTPN11, LAMB2, MAPK3	9	0.0022	0.0292	0.153462
GO:0045995	GO:0045995	Regulation of embryonic development	ENR	GO:0045995	PRKACA, RAB14, PHLDB1, GJA1, PAFAH1B1, DAG1, FAM129B, LAMA2, APOA1, LAMA3, CTNNB1, CLASP2, LAMA5, MYADM, LAMA4	15	0.0023	0.0306	0.151428
GO:0007528	GO:0007528	Neuromuscular junction development	ENR	GO:0007528	LRRK2, AGRN, ANK3, UTRN, DCTN1, LAMB2, COL4A1, CACNA2D2	8	0.0024	0.0316	0.150031
GO:0043537	GO:0043537	Negative regulation of blood vessel endothelial cell migration	ENR	GO:0043537	APOE, MECP2, HRG, TGFB1, ATP2B4, MMRN2, RGCC	7	0.0025	0.0326	0.148678
GO:1900221	GO:1900221	Regulation of amyloid-beta clearance	ENR	GO:1900221	APOE, CYP51A1, LRP1, CLU, ROCK1	5	0.0025	0.0331	0.148017
GO:1903779	GO:1903779	Regulation of cardiac conduction	ENR	GO:1903779	ACE2, PRKACA, ANK2, AGT, CAV1, EHD3, ATP2B4, FLNA, ITPR1, AHCYL1	10	0.0025	0.0333	0.147756
GO:0007417	GO:0007417	Central nervous system development	ENR	GO:0007417	ALDH1A2, CMA1, ACTB, EML1, MYH10, ENG, DCTN1, PRKG1, LAMB2, VTN, ATRN, MAOB, STAT3, BTD, APOD, PBX1, ALDH3A2, LRP1, NRP1, FLNA, DNAH5, GLUD1, ACAT1, HSPG2, CXCL12, AGER, CDH11, PAFAH1B1, CTNND1, TIMP2, MAPK3, CD9, SPTBN4, S100B, MECP2, ANXA3, NES, PLXNB2, SERPINE2, CKB, SLC2A1, NDRG2, CDC42, SZT2, AQP1, CRTAC1, GNG12, VIM, CORO1C, NUMB, LRRK2, H2AFY2, C1QA, DPYSL2, SEPP1, PTPN11, CLU, COL4A1, B4G…	67	0.0028	0.0358	0.144612
GO:1905605	GO:1905605	Positive regulation of blood-brain barrier permeability	ENR	GO:1905605	TJP1, TJP2, OCLN	3	0.0028	0.0358	0.144612
GO:0030855	GO:0030855	Epithelial cell differentiation	ENR	GO:0030855	ENG, CES1, TMOD1, CLIC4, LAMB2, PPL, POF1B, EPB41L5, ICAM1, RAP1A, NRP1, FLNA, MYADM, COL18A1, LGALS3, TJP1, ANXA1, PAFAH1B1, FLNB, DSP, RDX, TRIOBP, ASAH1, TAGLN, BDH2, IVL, ROCK1, IQGAP1, CDC42, HSD17B4, CD34, TJP2, VIM, FN3K, EVPL, SCEL, FASN, COL4A1, PECAM1, PODXL, PKP2, MSN, MLLT4, CTNNB1, PLOD3, ANXA4, GSTM3, TGFB1I1, NOTCH2	49	0.0028	0.0361	0.144249
GO:0003091	GO:0003091	Renal water homeostasis	ENR	GO:0003091	PRKACA, GNAS, AQP1, WFS1, AQP3, AQP4, PRKAR2A	7	0.0033	0.0404	0.139362
GO:0048641	GO:0048641	Regulation of skeletal muscle tissue development	ENR	GO:0048641	S100B, PRKAA1, CTNNB1, FAM129B, TGFB1, MTM1, FLOT1, NLN	8	0.0034	0.0418	0.137882
GO:0061515	GO:0061515	Myeloid cell development	ENR	GO:0061515	SLC4A1, PIP4K2A, HBZ, PAFAH1B1, ANXA2, DMTN, PTPN11, EPB42, BPGM	9	0.0037	0.0446	0.135067
GO:0030049	GO:0030049	Muscle filament sliding	ENR	GO:0030049	DMD, DES, TPM2, VIM, MYH2, TMOD1, ACTN2	7	0.0037	0.0451	0.134582

## Sheet: APPOPTOSIS_PROLIFERATION
GO Term	Enrichment Map Name	GS_DESCR	GS_Type	Formatted name	Genes	GS_SIZE	p-value	Enrichment FDR q-value	NES
GO:2000351	GO:2000351	Regulation of endothelial cell apoptotic process	ENR	GO:2000351	FGG, CDH5, FGB, FGA, SCG2, ICAM1, COL18A1, RGCC, ANO6	9	0.0012	0.0182	0.173993
GO:0043277	GO:0043277	Apoptotic cell clearance	ENR	GO:0043277	RAB14, RHOG, ALOX15, ANXA1, LRP1, CD36, TGM2, FCN1, FCN3	9	0.00047	0.0081	0.209151
GO:2000425	GO:2000425	Regulation of apoptotic cell clearance	ENR	GO:2000425	C4B, ALOX15, C2, C3, C4A	5	0.00038	0.0068	0.216749
GO:0008285	GO:0008285	Negative regulation of cell population proliferation	ENR	GO:0008285	ARG1, ALDH1A2, RBP4, ENG, FAM129B, FABP3, TGFB1, PRKG1, CAV2, OGN, HRG, STAT3, APOD, PDE5A, COL18A1, SFTPD, APOE, SCGB1A1, ILK, RGN, GJA1, CDH13, ITGA1, DDAH1, SRPX, TIMP2, CD9, AZGP1, DPT, SERPINE2, NDRG2, EMD, KANK2, CD109, TENC1, HRAS, FBLN1, SCG2, PODN, PLG, CTNNA1, VSIG4, CDH5, TES, RGCC, HLA-DRB1, IGFBP3, FAP, CAV1, CNN1, CTNNB1, LMNA, TGFB1I1, PAWR	54	0.00047	0.0081	0.209151
GO:0042127	GO:0042127	Regulation of cell population proliferation	ENR	GO:0042127	ALDH1A2, CTSH, LAMC1, TGFB1, CAV2, PDGFRB, OGN, LTF, HRG, STAT3, PRTN3, PBX1, LAMC2, NRP1, HLA-DPB1, APOE, BST2, SCGB1A1, LGALS3, GJA1, ADAM10, CDH13, ITGA1, DDAH1, TIMP2, MAPK3, ACE, S100B, CD81, AZGP1, CUL3, BST1, HMGB2, NDRG2, AQP1, GNAI2, KANK2, CD109, HPGD, TENC1, LRRK2, LRG1, FBLN1, SCG2, F2, PODN, PLG, CTNNA1, CLU, STX4, TNFSF13, VSIG4, CDH5, CRIP2, TNS3, SERPINF2, PRKAA1, TES, ELN, HLA-DR…	121	1.61e-06	5.21e-05	0.428316
GO:0001936	GO:0001936	Regulation of endothelial cell proliferation	ENR	GO:0001936	APOE, ARG1, ALDH1A2, CXCL12, DYSF, GJA1, ENG, CDH13, CAV2, RGCC, LRG1, CAV1, STAT3, HMGB2, PRKCA, SCG2, NRP1, KIAA1462	18	0.00017	0.0035	0.245593
GO:0072089	GO:0072089	Stem cell proliferation	ENR	GO:0072089	CD34, EML1, PAFAH1B1, NUMBL, NES, PLXNB2, NUMB, ARIH2, ARHGEF2	9	0.0022	0.0292	0.153462
GO:0010942	GO:0010942	Positive regulation of cell death	ENR	GO:0010942	ALDH1A2, CTSH, TGM2, PDGFRB, PPM1F, HRG, S100A9, LRP1, COL18A1, ARL6IP5, MMP9, APOE, ANXA1, ADAM10, ITGA1, SRPX, AKAP12, ARHGEF2, CASP1, DNM2, S100B, FGD4, PICALM, KNG1, TIMP3, CDC42, RPS27A, CAPN2, HPGD, CD36, ANO6, LRRK2, ARRB1, C1QA, CTNNA1, ZAK, CLU, HPR, HBA1, PAK2, UACA, RGCC, HBB, PTGIS, HIP1, IGFBP3, FAP, SNCA, AGT, CAV1, CTNNB1, HP, NOTCH2, PIN1, PAWR	55	0.00057	0.0095	0.202228
GO:0010941	GO:0010941	Regulation of cell death	ENR	GO:0010941	ALDH1A2, HLA-F, CTSH, LANCL1, MPO, PDGFRB, PPM1F, LTF, HRG, STAT3, CAT, ICAM1, LRP1, NRP1, FBXO7, ARL6IP5, APOE, LAMP3, ACTN4, LGALS3, GJA1, ADAM10, ITGA1, ARHGDIA, ACAA2, CASP1, S100B, HMGB2, KNG1, TIMP3, PRDX2, RPS27A, CAPN2, CD34, AQP1, GNAI2, KANK2, HPGD, HSPB6, ANXA5, LRRK2, VPS35, FGB, FGA, SCG2, CTNNA1, CLU, STX4, CDH5, HBA1, PRKAA1, PAK2, AGR3, UACA, HBB, HIP1, FGG, SNCA, AGT, CAV1, PTK2,…	114	0.00014	0.0029	0.25376
GO:1902041	GO:1902041	Regulation of extrinsic apoptotic signaling pathway via death domain receptors	ENR	GO:1902041	STX4, FGG, LGALS3, FGB, FGA, HMGB2, ICAM1, TIMP3, ARHGEF2	9	0.0033	0.0407	0.139041
GO:2001236	GO:2001236	Regulation of extrinsic apoptotic signaling pathway	ENR	GO:2001236	STX4, LGALS3, SRPX, PAK2, ARHGEF2, FGG, AGT, CAV1, FGB, FGA, HMGB2, SCG2, ICAM1, CTNNA1, NRP1, LMNA, TIMP3, PRDX2, ACSL5	19	0.0005	0.0086	0.20655

[truncated: 5 more sheets: PROPER_LUNG, CELLULAR_ORGANIZATION, GTP_HYDROLASES, PROTEIN_METABOLISM, SIGNALLING]
