# Supplementary material for: Increased antioxidative defense and reduced advanced glycation end-product formation by metabolic adaptation in non-small-cell-lung-cancer patients
Source: Nat Commun. 2025 Jun 3;16:5157. doi: 10.1038/s41467-025-60326-y (PMC12134105; doi:10.1038/s41467-025-60326-y)
Supplement: Supplementary file 8 — Supplementary Data 6 [file 41467_2025_60326_MOESM8_ESM.xlsx]

## Sheet: RESPONSEtoSTIMULI
GO Term	Enrichment Map Name	GS_DESCR	GS_Type	Formatted name	Genes	GS_SIZE	p-value	Enrichment FDR q-value	NES
GO:0009991	GO:0009991	Response to extracellular stimulus	ENR	GO:0009991	DCTPP1, HMGCS1, AGL, PRKAG1, HSPA5, ASNS, FSTL1, AACS, TBL1XR1, MYBBP1A, LAMP2, SFRP2, TBL2, LARP1, PTPRC, AHCY, GCN1L1, MBD3, VCAM1, ATG5, HAT1, EIF4G1, KYNU, EIF4EBP1, HNRNPA1, EIF2A, NAMPT, CAD, BCL10, ENSA, NENF, LARS, TNC, SPP1, GLUL, PSPH, EEF2, SIPA1, STAT1, EIF2AK2, SORD, IGFBP2, NUDT1, ADA, RRAGC, LYN, OGT, GBA, NUCB2, ACSL3, RELA, HMGCL, DAD1, MAX, SLC16A1, RRP8, LDHA, NQO1, PKM	59	0.00073	0.0202	0.169465
GO:0034605	GO:0034605	Cellular response to heat	ENR	GO:0034605	HSPD1, CLPB, STUB1, RBBP7, DHX36, ATP2A2, LYN, HSF1, PDCD6, C11ORF73, POLR2D, PDCL3, HSP90AB1	13	0.0018	0.042	0.137675
GO:0033574	GO:0033574	Response to testosterone	ENR	GO:0033574	CALR, PSPH, NASP, CAD, NME1, HSF1, BAD, GBA, AACS, SPP1	10	0.002	0.0473	0.132514
GO:0009628	GO:0009628	Response to abiotic stimulus	ENR	GO:0009628	PSMA4, PSME3, EGLN1, PARP1, PSMD13, ASNS, IGFBP7, NUCKS1, PLOD1, PSMC6, MAPK13, PSMD8, NPM1, POLD1, HSP90B1, EEF1D, EEF1A2, TBL2, IVL, PTPRC, AHCY, RELB, CLPB, RRM1, PSMD7, FAM162A, STUB1, EIF2B1, PPID, COL3A1, DHX36, ATP2A2, NAMPT, FEN1, FMR1, SERPINB13, BCL10, HYOU1, HSP90AB1, CDK5, BCL2L1, STAT1, CD38, MSH2, AGTRAP, IGFBP2, MSH6, TANK, ZMPSTE24, ADA, LYN, HSF1, PRKDC, GBA, LDHA, UBQLN1, ABHD12…	124	0.00018	0.0058	0.223657
GO:0010033	GO:0010033	Response to organic substance	ENR	GO:0010033	FKBP4, TOMM20, PSMA4, PARP1, EPRS, KEAP1, ASNS, MAPKAPK2, CCDC186, ERLEC1, DHX9, UQCRC1, POU2F1, MAPK13, PSMD8, MIF, ADAR, SEC31A, RAB13, GNPNAT1, PQBP1, TIMP1, POLR2C, PSMD7, STUB1, RBM15, SGTA, POLR2I, ATP2A2, NAMPT, FMR1, FKBP14, BCL10, HYOU1, SEC61B, CCDC47, CANX, ZPR1, HSP90AB1, OAS3, ITGB5, MAN1B1, GAPDH, BCL2L1, SRSF9, IL16, STAT2, STAT1, EIF2AK2, SLC25A5, YBX1, IGFBP2, TANK, MAVS, MFN2, A…	323	7.91e-10	6.56e-08	0.71831
GO:1901698	GO:1901698	Response to nitrogen compound	ENR	GO:1901698	SLC3A2, TOMM20, EGLN1, PARP1, EPRS, NCSTN, ASNS, ERLEC1, STT3B, PNPT1, DHX9, UQCRC1, SHC1, RANGAP1, PSMC6, MAPK13, NPM1, HSP90B1, RAB13, PQBP1, TIMP1, STUB1, EIF2B1, SGTA, COL3A1, DHX36, NAMPT, FMR1, SEC61B, CCDC47, SYAP1, HSP90AB1, CDK5, MAN1B1, BCL2L1, SRSF9, EEF2, STAT2, STAT1, LAMTOR3, CASP6, AGTRAP, CACYBP, MAVS, ADA, RRAGC, LYN, HSF1, RBBP4, PRKDC, OGT, SDF2L1, EIF6, CYC1, NNMT, OS9, LDHA, …	121	3.86e-05	0.0015	0.282391

## Sheet: REGULATIONofAPPOPTOSIS
GO Term	Enrichment Map Name	GS_DESCR	GS_Type	Formatted name	Genes	GS_SIZE	p-value	Enrichment FDR q-value	NES
GO:2001242	GO:2001242	Regulation of intrinsic apoptotic signaling pathway	ENR	GO:2001242	BCL2L1, HSPB1, PARP1, ENO1, GNB2L1, TRAP1, ERP29, TPT1, SLC9A3R1, P4HB, VNN1, ARMC10, MIF, TXNDC12, DDX3X, SFRP2, RPS3, NDUFS3, RPS7, PRKRA, UBQLN1, SOD2, BID, DFNA5, HYOU1, VDAC2, BAD, URI1	28	0.00023	0.0071	0.214874
GO:1903047	GO:1903047	Mitotic cell cycle process	ENR	GO:1903047	TBCE, IK, PCNA, TRIP13, GSPT1, ASUN, NUP62, MSTO1, TUBA4A, AAAS, SNX9, MCM4, MCM5, NDE1, PRMT1, AKAP8, CHMP7, VRK1, BCCIP, CHMP4B, TOP2A, MCM3, LIG1, BUB3, NCAPD2, GOLGA2, MCM6, TACC3, EIF4EBP1, SFN, PPAT, SMC4, ENSA, SDCCAG8, RPA3, FGFR1OP, MCM2, CCNY, CDKN2A, ZPR1, CDK5, MCM7, CDK1, BCL2L1, TPD52L1, MSH2, DLG1, MAD1L1, RCC1, EIF4E, AKAP8L, NAA50, PRCC, PRKDC, LCMT1, RQCD1, CNOT3, CDK5RAP3, MAX,…	72	0.00063	0.0176	0.175449
GO:0010941	GO:0010941	Regulation of cell death	ENR	GO:0010941	HTATIP2, SCRIB, ARHGEF16, TXNDC5, BIRC6, PSME3, EGLN1, PARP1, NCSTN, AGR2, ASNS, FAP, ATOX1, PPP1R10, SHC1, TPT1, NAA15, HSPE1, PDIA3, VNN1, NPM1, MIF, HSPA9, TOMM22, ADAR, BAG1, HSP90B1, C19ORF10, EEF1D, EEF1A2, CHMP4B, PTPRC, TOP2A, RPL10, TIMP1, ATG5, DIABLO, FAM162A, EIF4G1, PDCD4, PPID, ANP32A, DFNA5, SERPINB13, BCL10, AIMP2, NENF, HYOU1, C1QBP, XIAP, IGBP1, CDKN2A, URI1, ZPR1, HSP90AB1, CDK…	184	3.67e-06	0.00017	0.376955
GO:0034393	GO:0034393	Positive regulation of smooth muscle cell apoptotic process	ENR	GO:0034393	SOD2, RBM10, CDKN2A, MFN2, STK4, PDCD4	6	0.0021	0.048	0.131876
GO:0045786	GO:0045786	Negative regulation of cell cycle	ENR	GO:0045786	TOM1L1, TBRG4, SCRIB, PSMA4, PSME3, IK, GADD45GIP1, PCNA, TRIP13, PSMD13, PRKAG1, FAP, RBBP7, PNPT1, PPP1R10, PSMC6, PSMD8, NPM1, MIF, RAD21, PRMT1, TP53BP1, TOP2A, BUB3, PSMC3, TIPRL, PSMD7, PDCD4, SFN, CALR, HEXIM1, NSUN2, DHCR24, NAA10, CBX5, PPM1G, CDKN2A, BRE, HSP90AB1, CDK5, CDK1, BCL2L1, SIPA1, LAMTOR3, MSH2, DLG1, MAD1L1, IRF6, SLC9A3R1, RRAGC, PRCC, RBBP4, PRKDC, EVI2B, RQCD1, PSME4, CNO…	67	0.00087	0.0234	0.163078
GO:0006915	GO:0006915	Apoptotic process	ENR	GO:0006915	HTATIP2, SCRIB, BIRC6, PSME3, PARP1, NCSTN, FAP, SLC25A6, RAD21, DAP3, BAG1, C19ORF10, TOP2A, ATG5, DIABLO, FAM162A, GSKIP, PDCD4, PPID, DNASE2, BCL10, AIMP2, C1QBP, XIAP, CDKN2A, ZPR1, CDK5, GAPDH, BCL2L1, PDCD5, BCL2L13, CD38, MRPS30, CASP6, MSH2, SRA1, MSH6, MFN2, S100A14, ZMPSTE24, STK4, PPP2R1B, GNB2L1, RRAGC, SGPL1, FXR1, YARS, PRKDC, OGT, TIA1, PUF60, PTRH2, TMEM214, CLPTM1L, DAD1, GHITM, …	123	1.38e-08	9.78e-07	0.600966
GO:0007346	GO:0007346	Regulation of mitotic cell cycle	ENR	GO:0007346	TOM1L1, SCRIB, PSMA4, PSME3, IK, GADD45GIP1, PCNA, TRIP13, PSMD13, ASNS, ASUN, NUP62, FAP, PNPT1, TUBA4A, PPP1R10, PSMC6, POLDIP2, PSMD8, DRG1, RAD21, NDE1, PRMT1, TTLL12, PCID2, CHMP4B, TOP2A, BUB3, PSMC3, PSMD7, RANBP1, TACC3, EIF4G1, EIF4EBP1, SFN, GBF1, LGMN, NAA10, SDCCAG8, RPA3, FGFR1OP, CDKN2A, RCC2, MAP4K4, CDK1, BCL2L1, RAE1, PLRG1, MSH2, DLG1, MAD1L1, SRA1, RCC1, EIF4E, ZMPSTE24, STK4, …	79	0.00035	0.0105	0.197881
GO:0051402	GO:0051402	Neuron apoptotic process	ENR	GO:0051402	GAPDH, BCL2L1, BID, APP, MAX, NCSTN, XIAP, HSPA5, DIABLO, FAM162A, CDK5	11	0.002	0.0466	0.133161

## Sheet: PYRUVATE_NAD
GO Term	Enrichment Map Name	GS_DESCR	GS_Type	Formatted name	Genes	GS_SIZE	p-value	Enrichment FDR q-value	NES
GO:0006090	GO:0006090	Pyruvate metabolic process	ENR	GO:0006090	GAPDH, DHTKD1, BSG, SLC16A3, DLAT, SLC16A1, ENO1, LDHA, HKDC1, MPC2, PC, PKM, PFKP, GPI, ALDOC, ME2, VDAC1, HK2, PDHX, ALDOA	20	3.33e-06	0.00015	0.382391
GO:0019318	GO:0019318	Hexose metabolic process	ENR	GO:0019318	GAPDH, MAN2B1, SORD, ENO1, PMM2, B4GALT1, SLC25A13, MAN2A1, MDH2, HKDC1, PFKP, GPI, FUCA1, GDPGP1, DLAT, PDK1, BRAT1, POFUT1, MPI, SLC25A10, FUT8, PC, PKM, SLC25A12, BAD, GALK2, ALDOC, HK2, GLB1, ALDOA	30	2.27e-05	0.0009	0.304576
GO:0019674	GO:0019674	NAD metabolic process	ENR	GO:0019674	GAPDH_x000D_CD38_x000D_PKM_x000D_PFKP_x000D_GPI_x000D_ENO1_x000D_ALDOC_x000D_NADSYN1_x000D_HK2_x000D_LDHA_x000D_NADK2_x000D_ALDOA	12	0.00056	0.0161	0.179317
GO:1901136	GO:1901136	Carbohydrate derivative catabolic process	ENR	GO:1901136	DCTPP1, TYMP, HEXA, NAGLU, GALNS, STT3B, NUDT1, ITPA, ADA, FBXO2, SDC1, GBA, FUCA1, AHCY, ABCD1, CDA, GLA, GPC1, NT5C3A, CHI3L1, NUDT9, DPYD, FBXO6, GPC6, GNS, NPL, VCAN, PSAP, GLB1, MMP12, MAN1B1, ACOT7	32	5.65e-05	0.0021	0.267778

## Sheet: AEROBIC_RESPIRATION
GO Term	Enrichment Map Name	GS_DESCR	GS_Type	Formatted name	Genes	GS_SIZE	p-value	Enrichment FDR q-value	NES
GO:0032981	GO:0032981	Mitochondrial respiratory chain complex i assembly	ENR	GO:0032981	NDUFS8, NDUFB5, NDUFS7, ECSIT, NUBPL, NDUFS3, NDUFB10, TMEM126A, NDUFAF3, NDUFV2, NDUFAF2, NDUFA12, NDUFAF4, NDUFA8, NDUFB8, NDUFAB1	16	0.00019	0.0061	0.221467
GO:0001836	GO:0001836	Release of cytochrome c from mitochondria	ENR	GO:0001836	BCL2L1, SOD2, BID, MFF, BAK1, BAD, SFN, TIMM50	8	0.00091	0.0243	0.161439
GO:1990542	GO:1990542	Mitochondrial transmembrane transport	ENR	GO:1990542	ATP5J2, TOMM20, TOMM40, SFXN1, CYC1, TOMM7, HSPD1, SLC25A13, LETM1, AFG3L2, PNPT1, TIMM50, MPC2, GRPEL1, ATP5I, SLC25A12, ATP5J, COX5B, STOML2, C2ORF47, SLC25A22	21	6.32e-05	0.0023	0.263827
GO:0007005	GO:0007005	Mitochondrion organization	ENR	GO:0007005	ATP5J2, TOMM20, NDUFB5, COX7A2L, PARP1, HSD17B10, MAN2A1, PNPT1, MSTO1, TOMM34, MTX2, NDUFV2, PITRM1, SLC25A6, POLDIP2, NDUFAF2, NDUFA12, HSPA9, TOMM22, TIMM9, NDUFB8, PHB, DNAJA3, MX2, TOMM40, HSPD1, ATAD3B, ATG5, SQSTM1, NDUFS3, SFN, BAK1, ATP5I, MTX1, BAD, CDKN2A, TIMM13, CXADR, CDK5, ATAD3A, BCL2L1, TYMP, CHCHD2, YWHAZ, SLC25A5, NDUFS7, TIMM10B, HCFC1, TIMM10, MFN2, NDUFB10, AFG3L2, SLIRP, UQ…	91	1.18e-14	1.46e-12	1.18356
GO:0006626	GO:0006626	Protein targeting to mitochondrion	ENR	GO:0006626	PMPCB, TOMM20, TOMM40, MFF, TOMM7, HSPD1, TIMM10B, TIMM10, MFN2, TOMM34, TIMM50, TOMM70A, BID, PITRM1, SLC25A6, AGK, GRPEL1, TOMM22, TIMM9, TIMM13, TOMM5	21	5.69e-08	3.59e-06	0.544491
GO:0022904	GO:0022904	Respiratory electron transport chain	ENR	GO:0022904	NDUFB5_x000D_COX7A2L_x000D_NDUFS7_x000D_UQCRH_x000D_COX7C_x000D_NDUFB10_x000D_SLC25A13_x000D_ETFDH_x000D_UQCRC1_x000D_NDUFV2_x000D_UQCRB_x000D_NDUFAF2_x000D_NDUFA12_x000D_SDHC_x000D_NDUFA8_x000D_MYBBP1A_x000D_COX6B1_x000D_NDUFB8_x000D_NDUFS8_x000D_CYC1_x000D_NDUFS3_x000D_COX5A_x000D_BID_x000D_SDHA_x000D_SLC25A12_x000D_MT-CO2_x000D_COX5B_x000D_SLC25A22_x000D_NDUFAB1	29	7.69e-08	4.75e-06	0.532331
GO:0006839	GO:0006839	Mitochondrial transport	ENR	GO:0006839	ATP5J2_x000D_TOMM20_x000D_SLC25A13_x000D_PNPT1_x000D_TOMM34_x000D_MTX2_x000D_PITRM1_x000D_MPC2_x000D_SLC25A6_x000D_TOMM22_x000D_TIMM9_x000D_TOMM40_x000D_HSPD1_x000D_SFN_x000D_BAK1_x000D_ATP5I_x000D_BAD_x000D_TIMM13_x000D_BCL2L1_x000D_YWHAZ_x000D_SLC25A5_x000D_TIMM10B_x000D_TIMM10_x000D_MFN2_x000D_AFG3L2_x000D_AGK_x000D_GRPEL1_x000D_STOML2_x000D_C2ORF47_x000D_TOMM5_x000D_PMPCB_x000D_HIP1R_x000D_SF…	49	1.83e-09	1.45e-07	0.683863
GO:0000963	GO:0000963	Mitochondrial rna processing	ENR	GO:0000963	TBRG4_x000D_TRMT10C_x000D_PUS1_x000D_HSD17B10_x000D_KIAA0391_x000D_TRMT5_x000D_PNPT1	7	0.0011	0.028	0.155284
GO:0010821	GO:0010821	Regulation of mitochondrion organization	ENR	GO:0010821	BCL2L1_x000D_PDCD5_x000D_STAT2_x000D_YWHAZ_x000D_SLC25A5_x000D_MFN2_x000D_FAM49B_x000D_UBE2L3_x000D_GBA_x000D_BAG4_x000D_LMAN1_x000D_HIP1R_x000D_MFF_x000D_TOMM7_x000D_CASP8_x000D_SQSTM1_x000D_FAM162A_x000D_RHOT2_x000D_HAX1_x000D_SFN_x000D_BID_x000D_APP_x000D_BAK1_x000D_GOLPH3_x000D_FXN_x000D_BAD_x000D_CDKN2A_x000D_VDAC1_x000D_HK2	29	0.0014	0.034	0.146852
GO:0140053	GO:0140053	Mitochondrial gene expression	ENR	GO:0140053	MRRF_x000D_TBRG4_x000D_TUFM_x000D_MRPS2_x000D_MRPS18B_x000D_MRPS35_x000D_MRPL15_x000D_MRPS30_x000D_GADD45GIP1_x000D_HSD17B10_x000D_TRMT5_x000D_WARS2_x000D_PNPT1_x000D_SARS2_x000D_MRPS27_x000D_AARS_x000D_MRPL46_x000D_TRMT10C_x000D_MRPL22_x000D_AARS2_x000D_MRPS7_x000D_MRPS5_x000D_TSFM_x000D_DAP3_x000D_MRPS31_x000D_MRPL12_x000D_MRPL9_x000D_MRPL49_x000D_TARS2_x000D_MRPL50_x000D_GARS_x000D_KIAA0391_x0…	47	2.43e-14	2.89e-12	1.15391
GO:0007007	GO:0007007	Inner mitochondrial membrane organization	ENR	GO:0007007	ATP5J2, TIMM10, LETM1, AFG3L2, MTX2, AGK, HSPA9, ATP5I, MTX1, TIMM9, ATP5J, TIMM13, C2ORF47	13	0.0003	0.0091	0.204096
GO:0009060	GO:0009060	Aerobic respiration	ENR	GO:0009060	DHTKD1, NDUFS8, FAHD1, COX7A2L, DLAT, NDUFS7, COX5A, UQCRH, COX7C, MDH2, UQCRC1, UQCRB, BLOC1S1, SDHA, SDHC, MT-CO2, FXN, COX5B, ME2, IDH2, COX6B1	21	5.99e-06	0.00027	0.356864
GO:0000959	GO:0000959	Mitochondrial rna metabolic process	ENR	GO:0000959	TBRG4, MRPL12, TARS2, GARS, HSD17B10, KIAA0391, TRMT5, WARS2, PNPT1, SARS2, AARS, TRMT10C, PUS1, AARS2, YARS2, DARS2	16	1.4e-06	7.12e-05	0.414752

## Sheet: AA_METABOLISM
GO Term	Enrichment Map Name	GS_DESCR	GS_Type	Formatted name	Genes	GS_SIZE	p-value	Enrichment FDR q-value	NES
GO:0006541	GO:0006541	Glutamine metabolic process	ENR	GO:0006541	PPAT, GLUL, CAD, ASNSD1, ASNS, CTPS1, GMPS, GFPT1	8	0.00071	0.0199	0.170115
GO:0006520	GO:0006520	Cellular amino acid metabolic process	ENR	GO:0006520	SEPHS1, HSD17B10, ASNSD1, EPRS, EEF1E1, ASNS, IL4I1, SARS2, AARSD1, BPHL, AARS, GART, ADI1, SHMT2, AHCY, OAT, TARS2, GARS, DARS, KYNU, DPYD, PPAT, CAD, AIMP2, PYCR2, LARS, ALDH18A1, AIMP1, GMPS, GLUL, PSPH, APIP, CTPS1, WARS2, YARS, AARS2, GGT1, GFPT1, MUT, HMGCL, ACY1, PYCR1, NARS2, FARSB, SMS, BCAT1, PLOD2, IARS, VARS, SCLY, HRSP12, GCSH, PSAT1, NARS, TARS, FARSA, SLC25A12, YARS2, DARS2, ADSS	60	3.85e-11	3.77e-09	0.842366

## Sheet: PROTEIN_METABOLISM
GO Term	Enrichment Map Name	GS_DESCR	GS_Type	Formatted name	Genes	GS_SIZE	p-value	Enrichment FDR q-value	NES
GO:0019941	GO:0019941	Modification-dependent protein catabolic process	ENR	GO:0019941	TOM1L1, PSMA4, BIRC6, PSME3, RNF213, PSMD13, ISG15, KEAP1, HSPA5, ERLEC1, UBE2K, STT3B, UCHL5, UBE2L3, PSMC6, PSMD8, TCEB1, FAF2, UBQLN4, TBL1XR1, UBAP1, NPLOC4, LTN1, HSP90B1, UFD1L, SEL1L, BUB3, PSMC3, SQSTM1, VPS37C, PSMD7, DNAJC10, STUB1, SGTA, TMUB1, SEC61B, UBE4B, CCDC47, MAN1B1, CDK1, GID8, UBQLN2, UBE3C, ZMPSTE24, UBE2G1, FBXO2, SHARPIN, UBE2H, UBE2I, PSME4, NEDD8, PCBP2, OS9, BAG6, UBQLN…	62	0.0022	0.0498	0.130277
GO:0051336	GO:0051336	Regulation of hydrolase activity	ENR	GO:0051336	SCRIB, ARHGEF16, BIRC6, PSME3, PRKD2, EGLN1, RAB4A, UCHL5, DHX9, PPP1R10, RANGAP1, HSPE1, ABCE1, SNX9, NPM1, HSCB, NDE1, HSP90B1, CLPX, PTPRC, TIMP1, TIPRL, DIABLO, RANBP1, FAM162A, PCOLCE, A2ML1, PPP1R14B, CD2BP2, SERPINB13, BCL10, ENSA, AHSA1, XIAP, IGBP1, CDKN2A, SERPINB3, URI1, HSP90AB1, SERPINB2, OAS3, GAPDH, PDCD5, PPP6R2, BCL2L13, PREX1, EIF2AK2, MSH2, MSH6, TANK, PPP2R1B, RAB3GAP1, GNB2L1…	129	0.0018	0.0432	0.136452
GO:0018193	GO:0018193	Peptidyl-amino acid modification	ENR	GO:0018193	FKBP4, PRKD2, EGLN1, GALNT2, MAPKAPK3, PARP1, ST6GAL1, DOHH, NUP35, DDOST, MAPKAPK2, STT3B, PLOD1, RPN1, METAP1, AAAS, NAA15, RANGAP1, DHPS, MAPK13, SUMO2, PRMT1, TTLL12, PPIB, VRK1, IVL, MBD3, FKBP7, PPID, RAB3D, DR1, NAA10, FKBP14, CDKN2A, PPIH, CDK5, DPM1, GAPDH, CSNK1A1, NUP155, EIF2AK2, HCFC1, NUP188, OSTC, ZMPSTE24, STK4, LEPRE1, PPIE, RPN2, RSF1, ALG5, LYN, NAA50, PRKDC, PIN4, OGT, DAD1, N…	107	4.08e-06	0.00019	0.372125
GO:0006508	GO:0006508	Proteolysis	ENR	GO:0006508	TOMM20, PSMA4, BIRC6, PSME3, PARP1, PSMD13, NCSTN, KEAP1, ERLEC1, FAP, STT3B, UCHL5, UBE2L3, METAP1, PITRM1, PSMC6, PSMD8, PDIA3, UBQLN4, TBL1XR1, UBAP1, HSP90B1, CLPX, CHMP4B, BUB3, VPS37C, PSMD7, STUB1, PCOLCE, SGTA, PIGK, SEC61B, CPD, CCDC47, MAN1B1, UBE3C, CASP6, PIGS, HCFC1, TANK, ZMPSTE24, SPCS3, HTRA3, USP39, EIF3F, OGT, CLPP, SDF2L1, PMPCB, NEDD8, NUP98, CPNE1, TNIP1, OS9, OTUB1, RUVBL1, …	128	0.0012	0.03	0.152288
GO:0061077	GO:0061077	Chaperone-mediated protein folding	ENR	GO:0061077	FKBP4, ERO1L, HSPB1, HSPA13, PEX19, PDIA4, CRTAP, CHORDC1, HSPA5, HSPH1, SGTA, LEPRE1, PPID, TRAP1, HSPE1, DNAJC5, HSPA9, DNAJC7, PDCL3, BAG1, PPIB	21	4.44e-08	2.88e-06	0.554061
GO:0051604	GO:0051604	Protein maturation	ENR	GO:0051604	ATP6AP2, ERO1L, PARP1, PRDX4, NCSTN, DOHH, SEC11C, ZMPSTE24, AFG3L2, SPCS3, HM13, NAA25, NAA15, DHPS, NAA50, GLRX5, SPCS1, BOLA2, HSCB, OGT, STOML2, GGT1, GLRX3, SNAPIN, PMPCB, HSPD1, CASP8, SPCS2, STUB1, COMP, CPE, MMP14, CALR, TESC, LGMN, GCSH, DHCR24, NAA10, BAK1, FAM96B, DNAJB11, SERPINH1, SEC11A, CPD, FXN, BAD, NDUFAB1	47	1.21e-08	8.68e-07	0.606148
GO:1903320	GO:1903320	Regulation of protein modification by small protein conjugation or removal	ENR	GO:1903320	ISG15, HSPA5, TANK, UBE2L3, FBXO2, HSPBP1, NMI, UBE2I, OGT, DDX3X, DNAJA3, RELA, RPS3, CDK5RAP3, ATG5, SQSTM1, TNIP1, RPS7, STUB1, GOLGA2, OTUB1, WDR70, UBQLN1, RPL5, RPS2, GTPBP4, BCL10, AIMP2, PDCD6, GLMN, XIAP, CDKN2A, VPS28, HSP90AB1, CDK5, HMG20A	36	0.00036	0.0107	0.197062
GO:1901565	GO:1901565	Organonitrogen compound catabolic process	ENR	GO:1901565	PSMA4, BIRC6, PSME3, PSMD13, HSD17B10, LYPLAL1, KEAP1, ERLEC1, FAP, STT3B, UCHL5, UBE2L3, PSMC6, PSMD8, UBQLN4, TBL1XR1, UBAP1, HSP90B1, LAMP2, CLPX, CHMP4B, AHCY, OAT, BUB3, ABCD1, GLA, VPS37C, PSMD7, STUB1, SGTA, NUDT9, DPYD, SEC61B, CCDC47, GLB1, MAN1B1, GLUL, UBE3C, ZMPSTE24, ADA, SGPL1, CLPP, GBA, SMPDL3B, SDF2L1, FUCA1, NEDD8, HMGCL, LYPLA2, CDA, BCAT1, OS9, BAG6, HRSP12, UBQLN1, ABHD12, GC…	125	7.31e-06	0.00032	0.349485
GO:0019511	GO:0019511	Peptidyl-proline hydroxylation	ENR	GO:0019511	P4HB, ERO1L, EGLN1, P4HA1, P4HA2, PRDX4, CRTAP, LEPREL2, LEPRE1	9	3.26e-05	0.0013	0.288606
GO:0031330	GO:0031330	Negative regulation of cellular catabolic process	ENR	GO:0031330	BCL2L1, YBX1, MAPKAPK2, ERLEC1, UCHL5, LRPPRC, DHX9, NPC1, TAF15, SLIRP, PKP3, POLDIP2, RBM10, PABPC1, UBQLN4, OGT, PKP1, PDCL3, MAP1A, CHMP4B, LARP1, CDK5RAP3, TIMP1, RPS7, PAIP1, DKC1, OS9, GOLGA2, SGTA, EIF4G1, BAG6, DHX36, RPL5, NSUN2, FAM192A, NAMPT, FMR1, F8A1, UBE2J1, CDKN2A, HSP90AB1, HERC1	42	1.96e-05	0.00079	0.310237
GO:0009057	GO:0009057	Macromolecule catabolic process	ENR	GO:0009057	RPS18, PSMA4, BIRC6, PSME3, PSMD13, AGL, GSPT1, LYPLAL1, KEAP1, ERLEC1, FAP, STT3B, UCHL5, RPL9, PNPT1, UBE2L3, PSMC6, RPS23, RPL6, PSMD8, RPL36A, UBQLN4, TBL1XR1, UBAP1, RPS27, HSP90B1, LAMP2, CLPX, PATL1, CHMP4B, BUB3, RPL10, RPS24, VPS37C, PSMD7, STUB1, RPS9, SGTA, EIF4G1, RPL32, DNASE2, RPL5, RPL18A, FEN1, RPL37A, SEC61B, ISG20, CCDC47, MAGOH, ZPR1, GLB1, CDK5, MAN1B1, RPL13, RPS12, UBE3C, RP…	186	4.25e-23	7.59e-21	2.01198
GO:0050821	GO:0050821	Protein stabilization	ENR	GO:0050821	GAPDH, CDC37L1, PEX19, CRTAP, HCFC1, STK4, LEPRE1, NAA15, TELO2, HYPK, PDCL3, PHB, DNAJA3, PPIB, LAMP2, HIP1R, SEL1L, HSPD1, RPS7, PRKRA, NAPG, BAG6, CALR, SEC16A, TESC, RPL5, COG7, GTPBP4, CDKN2A, ZNF207, HSP90AB1, COG3	32	7.41e-05	0.0026	0.258503
GO:0018208	GO:0018208	Peptidyl-proline modification	ENR	GO:0018208	FKBP4, ERO1L, EGLN1, P4HA1, P4HA2, FKBP7, FKBP9, FKBP10, PRDX4, CRTAP, LEPRE1, PPIE, PPID, P4HB, FKBP14, PPIL3, FKBP11, PIN4, LEPREL2, PPIH, PPIB	21	1.48e-07	8.7e-06	0.506048
GO:1903051	GO:1903051	Negative regulation of proteolysis involved in cellular protein catabolic process	ENR	GO:1903051	MAP1A, RPS7, ERLEC1, OS9, UCHL5, SGTA, BAG6, RPL5, FAM192A, F8A1, UBE2J1, OGT, CDKN2A, PDCL3, HSP90AB1	15	0.0018	0.0432	0.136452
GO:1903050	GO:1903050	Regulation of proteolysis involved in cellular protein catabolic process	ENR	GO:1903050	CSNK1A1, TMTC3, PSME3, UBQLN2, KEAP1, ERLEC1, UBE2K, UCHL5, GNB2L1, HSPBP1, TMF1, UBQLN4, OGT, GBA, SUMO2, PDCL3, MAP1A, RPS7, STUB1, OS9, SGTA, BAG6, UBQLN1, PSMD14, RPL5, FAM192A, FMR1, F8A1, GLMN, UBE2J1, CDKN2A, ARAF, HSP90AB1	33	0.002	0.0466	0.133161
GO:0043412	GO:0043412	Macromolecule modification	ENR	GO:0043412	FKBP4, TOMM20, PSMA4, IRF2BP2, RCN1, EGLN1, GALNT2, PARP1, HSD17B10, ST6GAL1, LYPLAL1, KEAP1, MAPKAPK2, UCHL5, PLOD1, TRMT1L, TRMT6, AAAS, SCYL3, DHPS, MAPK13, PSMD8, SNRPD3, ADAR, TTLL12, RAB13, VRK1, IVL, TIMP1, ATG5, ASCC3, PSMD7, DKC1, STUB1, UBL4A, RBM15, FBL, RAB3D, DR1, FKBP14, BCL10, PIGK, XIAP, DPM1, MAN1B1, GAPDH, NUP155, MINPP1, EIF2AK2, NUP188, ZMPSTE24, STK4, LEPRE1, PPIE, RPN2, IRF2…	309	9.52e-05	0.0033	0.248149
GO:0030162	GO:0030162	Regulation of proteolysis	ENR	GO:0030162	BIRC6, PSME3, KEAP1, SERPINE1, ERLEC1, UBE2K, UCHL5, HSPE1, HSPBP1, SNX9, PIH1D1, UBQLN4, SUMO2, PDCL3, DNAJA3, PCID2, SFRP2, CLPX, HSPD1, SPINT2, TIMP1, RPS7, DIABLO, FAM162A, STUB1, PCOLCE, SGTA, SFN, A2ML1, MMP14, SPINT1, RPL5, LGMN, FAM192A, FMR1, DHCR24, SERPINB13, BCL10, BAK1, F8A1, PDCD6, GLMN, SERPINH1, XIAP, IGBP1, BAD, CDKN2A, SERPINB3, HSP90AB1, CDK5, SERPINB2, IDE, GAPDH, SERPINB5, PD…	91	3.34e-05	0.0013	0.288606
GO:0006465	GO:0006465	Signal peptide processing	ENR	GO:0006465	SPCS3, HM13, SPCS2, SPCS1, SEC11A, SEC11C	6	0.0008	0.0218	0.166154
GO:0034975	GO:0034975	Protein folding in endoplasmic reticulum	ENR	GO:0034975	DNAJC3, CALR, ERO1L, PDIA3, HSPA5, CANX, DNAJC10, HSP90B1	8	1.47e-05	0.00061	0.321467
GO:0006620	GO:0006620	Posttranslational protein targeting to endoplasmic reticulum membrane	ENR	GO:0006620	CHMP4B, SEC61A1, SEC61B, SEC63, HSPA5, SGTA	6	0.0016	0.0378	0.142251
GO:0010952	GO:0010952	Positive regulation of peptidase activity	ENR	GO:0010952	PDCD5, PSME3, BCL2L13, TANK, GNB2L1, LYN, HSPE1, RCN3, HSF1, DDX3X, DNAJA3, PSME4, SFRP2, CLPX, RPS3, HIP1R, HSPD1, CASP8, DIABLO, FAM162A, PCOLCE, PSMD14, BID, LGMN, APP, BCL10, BAK1, TRADD, PDCD6, BAD, CDKN2A, SERPINB3	32	0.0002	0.0066	0.218046
GO:0009100	GO:0009100	Glycoprotein metabolic process	ENR	GO:0009100	MAN2B1, GALNT2, SULF1, PRKCSH, ST6GAL1, DDOST, B4GALT1, STT3B, MAN2A1, RPN1, TMEM165, POMK, ALG1, IMPAD1, SEL1L, GPC1, GOLGA2, GANAB, GALNT3, STT3A, AGA, COG7, GALNT7, GOLPH3, VCAN, DPM1, MAN1B1, TMTC3, B3GNT1, TRIP11, HEXA, PMM2, OSTC, RPN2, GALNT1, NPC1, ALG5, FBXO2, OGT, SDF2, MUC5B, GFPT1, SDF2L1, DAD1, LMAN1, TNIP1, OS9, POFUT1, MPI, FUT8, MCFD2, UGDH, FBXO6, MAGT1, UBE2J1, MMP12, COG3	57	2.38e-06	0.00012	0.392082
GO:0018279	GO:0018279	Protein n-linked glycosylation via asparagine	ENR	GO:0018279	DAD1, LMAN1, ST6GAL1, DDOST, OSTC, STT3B, RPN2, RPN1, STT3A, ALG5, FUT8, MCFD2, MAGT1, UBE2J1, DPM1	15	2.52e-07	1.47e-05	0.483268

## Sheet: RESPONSEtoSTRESS
GO Term	Enrichment Map Name	GS_DESCR	GS_Type	Formatted name	Genes	GS_SIZE	p-value	Enrichment FDR q-value	NES
GO:0006457	GO:0006457	Protein folding	ENR	GO:0006457	FKBP4, TBCE, CDC37L1, PEX19, PRDX4, PRKCSH, CRTAP, HSPA5, DNAJC3, PDRG1, P4HB, HSPE1, HSPBP1, HSPA4L, PDIA3, NUDC, HSPA9, QSOX2, PFDN2, PFDN4, SIL1, NFYC, DNAJC7, PDCL3, BAG1, DNAJA3, HSP90B1, PFDN5, PPIB, CLPX, BAG4, HSPD1, CHORDC1, DNAJC10, SGTA, GANAB, PPID, CALR, NUDCD3, DNAJB11, AHSA1, CANX, PPIH, HSP90AB1, ERO1L, HSPB1, LEPRE1, PPIE, TRAP1, ERP29, GRPEL1, DNAJC1, LMAN1, HSPA13, FKBP9, PDIA4…	62	2.22e-16	2.85e-14	1.35452
GO:0006986	GO:0006986	Response to unfolded protein	ENR	GO:0006986	GOSR2, ERO1L, SSR1, HSPB1, EIF2AK2, HSPA5, ASNS, MFN2, PREB, STT3B, MANF, DNAJC3, SHC1, HSPE1, HSPA4L, HSF1, FAF2, HSPA9, SEC31A, HSP90B1, GFPT1, C19ORF10, TBL2, HDGF, SRPRB, CDK5RAP3, HSPD1, HSPA13, PDIA6, ARFGAP1, STUB1, COMP, HSPH1, CALR, SRPR, FKBP14, BAK1, FBXO6, DNAJB11, HYOU1, SERPINH1, CANX, HSP90AB1	43	2.02e-10	1.77e-08	0.775203
GO:0034976	GO:0034976	Response to endoplasmic reticulum stress	ENR	GO:0034976	UFM1, HSPA5, ASNS, ERLEC1, UBE2K, STT3B, GORASP2, DNAJC3, SHC1, P4HB, PSMC6, PDIA3, FAF2, NPLOC4, SEC31A, HSP90B1, C19ORF10, UFD1L, TBL2, HDGF, SRPRB, SEL1L, DNAJC10, STUB1, SGTA, EIF4G1, TMUB1, CALR, ATP2A2, FKBP14, BAK1, DNAJB11, HYOU1, SEC61B, UBE4B, CCDC47, CANX, MAN1B1, GOSR2, EEF2, TMTC3, ERO1L, SSR1, UBQLN2, EIF2AK2, PREB, TMEM33, HM13, FBXO2, RCN3, DDX3X, GFPT1, SDF2L1, CDK5RAP3, PDIA4, P…	64	3.15e-14	3.72e-12	1.14295
GO:0033554	GO:0033554	Cellular response to stress	ENR	GO:0033554	PSMA4, RFC2, EGLN1, MRPS35, TRIP13, PARP1, KEAP1, ASNS, MAPKAPK2, ERLEC1, NUCKS1, UCHL5, MAPK13, PSMD8, MIF, UBQLN4, MCM5, SEC31A, BCCIP, ATG5, ASCC3, POLR2C, PSMD7, STUB1, SGTA, POLR2I, ATP2A2, FMR1, FKBP14, RPA3, HYOU1, CBX5, SEC61B, XIAP, CCDC47, CANX, MCTS1, HSP90AB1, MAN1B1, BCL2L1, C9ORF142, EIF2AK2, MSH2, STAU1, MSH6, TANK, MFN2, ZMPSTE24, STK4, PPIE, RRAGC, SDF2L1, TRIM28, RRP8, BAG6, UBQ…	221	5.76e-13	6.21e-11	1.02069
GO:0034063	GO:0034063	Stress granule assembly	ENR	GO:0034063	PRRC2C, G3BP2, RPS23, ATXN2L, G3BP1, UBAP2L, DDX3X, DDX6	8	0.00055	0.0158	0.180134
GO:0036498	GO:0036498	IRE1-mediated unfolded protein response	ENR	GO:0036498	GOSR2, C19ORF10, HDGF, SSR1, SRPRB, PDIA6, HSPA5, ARFGAP1, PREB, DNAJC3, SHC1, SRPR, FKBP14, DNAJB11, HYOU1, SEC31A, GFPT1	17	8.83e-06	0.00038	0.342022
GO:0080135	GO:0080135	Regulation of cellular response to stress	ENR	GO:0080135	FKBP4, PARP1, NUP35, AGR2, MAPKAPK2, ERLEC1, PNPT1, DHX9, PPP1R10, TPT1, AAAS, VNN1, NPM1, MIF, UBQLN4, DNAJC7, PRMT1, BAG1, TERF2IP, ABCD1, SGTA, WDR70, EIF4G1, PDCD4, NAMPT, FMR1, RPA3, HYOU1, IGBP1, CDKN2A, SERPINB3, NUDT16L1, HSP90AB1, BCL2L1, THOC5, TPD52L1, NUP155, EIF2AK2, YBX1, NUP188, ENO1, ZMPSTE24, GNB2L1, TRAP1, LYN, FXR1, HSF1, PRKDC, TXNDC12, NUP98, TRIM28, OS9, OTUB1, NUP210, LETM1…	104	2.15e-08	1.48e-06	0.582974
GO:0036503	GO:0036503	ERAD pathway	ENR	GO:0036503	UBQLN2, HSPA5, ERLEC1, STT3B, HM13, FBXO2, PSMC6, RCN3, FAF2, NPLOC4, HSP90B1, SDF2L1, UFD1L, SEL1L, DNAJC10, STUB1, OS9, SGTA, BAG6, TMUB1, UBQLN1, FBXO6, SEC61B, UBE2J1, UBE4B, CCDC47, MAN1B1	27	2.56e-08	1.71e-06	0.5767
GO:0006979	GO:0006979	Response to oxidative stress	ENR	GO:0006979	EEF2, ERO1L, EGLN1, STAT1, CD38, PCNA, PNKP, PARP1, PRDX4, STAU1, KEAP1, ETFDH, PNPT1, NUDT1, ATOX1, ADA, HMOX2, MAPK13, VNN1, HSF1, NDUFA12, SDC1, CYP1B1, NDUFS8, RELA, RPS3, HSPD1, PYCR1, SRXN1, DIABLO, GSKIP, PDK1, PRKRA, LDHA, MMP14, NME2, ATP2A2, SOD2, APP, DHCR24, BAK1, NQO1, S100A7, KPNA4, PYCR2, BAD, FXN, CDK1	48	0.0022	0.0495	0.130539
GO:1905897	GO:1905897	Regulation of response to endoplasmic reticulum stress	ENR	GO:1905897	BCL2L1, UBQLN2, HSPA5, AGR2, ERLEC1, OS9, SGTA, TMEM33, GNB2L1, ERP29, BAG6, MANF, DNAJC3, UBQLN1, APP, BAK1, HYOU1, UBE2J1, TXNDC12	19	0.0002	0.0066	0.218046

## Sheet: LOCALIZATIONandTRANSPORT
GO Term	Enrichment Map Name	GS_DESCR	GS_Type	Formatted name	Genes	GS_SIZE	p-value	Enrichment FDR q-value	NES
GO:0099041	GO:0099041	Vesicle tethering to golgi	ENR	GO:0099041	C17ORF75, WDR11, TRIP11, FAM91A1, TBC1D23	5	0.00034	0.0101	0.199568
GO:0032527	GO:0032527	Protein exit from endoplasmic reticulum	ENR	GO:0032527	UFD1L, SEL1L, ERLEC1, OS9, PREB, HM13, SEC16A, SEC13, FAF2, SEC61B, MIA2, NPLOC4, HSP90B1	13	1.59e-06	8e-05	0.409691
GO:0072594	GO:0072594	Establishment of protein localization to organelle	ENR	GO:0072594	SCRIB, TOMM20, RPS18, ACOX1, IPO9, PEX19, SEC63, NUP35, RPL9, TOMM34, PPP1R10, PITRM1, SLC25A6, RPS23, RPL6, RPL36A, TOMM22, ADAR, TIMM9, RPS27, LAMP2, TOMM40, CHMP4B, IPO11, RPL10, RPS24, VPS37C, RPS9, SGTA, TNPO2, RPL32, SRP19, RPL5, RPL18A, RPL37A, SEC61B, RPL13, RPS12, NUP155, RPL15, RPL7A, NUP188, MFN2, RPL38, RAB3GAP1, RPL4, SPCS3, RPL30, RPS4X, CRAT, RPS25, TOMM5, PMPCB, HMGCL, NUP98, KPNA…	128	3.15e-33	8.98e-31	3.00467
GO:0006891	GO:0006891	intra-Golgi vesicle-mediated transport	ENR	GO:0006891	GOSR2, COPA, COPB1, GOLGA5, COG8, COG6, COPG2, NAPG, COPG1, COPE, CUX1, COPZ1, COPB2, GOLGA3, COG3, COG5	16	1.4e-07	8.38e-06	0.507676
GO:0070972	GO:0070972	Protein localization to endoplasmic reticulum	ENR	GO:0070972	RPLP2, RPS18, RPL27, SEC63, HSPA5, RPS28, RPL9, RPS6, RPS23, RPL6, RPL36A, SPCS1, RPS27, RPL8, CHMP4B, RPS10, SPCS2, RPL10, RPS24, RPS7, RPS9, SGTA, GBF1, RPL32, MIA3, SRP19, RPL5, RPL18A, RPS2, RPL24, RPL37A, SEC61B, RPL13, RPS12, SEC61A1, RPL15, RPL7A, RPL14, RPS21, PMM2, RPL3, RPS8, KDELR2, RPL38, RPL27A, RPL21, RPLP1, RAB3GAP1, RPL4, RPSA, RER1, RPL22, SPCS3, RPL30, RPS11, RPS4X, SRP14, MIA2,…	70	3.66e-29	9.22e-27	2.60353
GO:0006903	GO:0006903	Vesicle targeting	ENR	GO:0006903	GOSR2, SCRIB, TFG, TRIP11, SEC23IP, PREB, TMED2, ARFGAP3, WDR11, SNAP29, TBC1D23, SEC24D, SEC31A, SEC24A, LMAN1, SAR1B, SEC23A, GOLGA2, GBF1, SEC16A, MCFD2, USO1, C17ORF75, TMED9, SEC13, PDCD6, FAM91A1, YKT6	28	1.35e-08	9.63e-07	0.601637
GO:0051205	GO:0051205	Protein insertion into membrane	ENR	GO:0051205	BAG6, AGK, TIMM10, BAD, TOMM22, TIMM9, UBL4A, TIMM13, SGTA, C2ORF47	10	0.002	0.0473	0.132514
GO:0061024	GO:0061024	Membrane organization	ENR	GO:0061024	ATP5J2, TOMM20, SEC23IP, STX16, TAP2, BET1L, SNX9, SNAP29, TAPBP, HSPA9, APOA1BP, TOMM22, TIMM9, SEC31A, RAB13, SNAPIN, CHMP7, VRK1, SEC24A, CHMP4B, PTPRC, SAR1B, ABCD1, REPS1, UBL4A, GOLGA2, SGTA, GBF1, ATP2A2, USO1, ATP5I, SYNGR2, BCL2L1, NUP155, SLC25A5, MFN2, ZMPSTE24, RER1, GLTP, LMAN1, HIP1R, LETM1, TIMM50, BAG6, BID, ATL2, BAIAP2L1, ARPC3, MTX2, ARPC1A, DNAJA3, MX2, GOLPH3L, SFN, MIA3, CAL…	102	1.58e-06	7.94e-05	0.410018
GO:0048490	GO:0048490	Anterograde synaptic vesicle transport	ENR	GO:0048490	SNAPIN, AP3S1, BLOC1S1, BLOC1S6, AP3M1, BLOC1S5, AP3D1	7	0.0011	0.028	0.155284
GO:0060341	GO:0060341	Regulation of cellular localization	ENR	GO:0060341	SCRIB, ARHGEF16, PARP1, GOPC, AGR2, ERLEC1, DHX9, UBE2L3, AAAS, RANGAP1, MPC2, NDUFAF2, SNAPIN, PTPRC, SAR1B, ATG5, ARFIP1, DKC1, GBF1, DHX36, ATP2A2, FMR1, CDKN2A, ZPR1, HSP90AB1, CDK5, BCL2L1, GLUL, PDCD5, BYSL, MAVS, ZMPSTE24, LRRC15, RAB3GAP1, GNB2L1, RER1, LYN, ATAD1, VSNL1, LMAN1, CDK5RAP3, SH3GL1, CHERP, TRIM28, OS9, LETM1, BID, LYPLA1, CNPY4, AKAP9, GPC6, UBE2J1, VPS28, TM9SF4, CASK, FERM…	107	0.0015	0.0377	0.142366
GO:0051223	GO:0051223	Regulation of protein transport	ENR	GO:0051223	SCRIB, ARHGEF5, TLR2, GOPC, FERMT1, UFM1, AACS, NUP62, ERLEC1, UBE2L3, RANGAP1, MPC2, SLC25A6, NDUFAF2, CDH1, MIF, SLC12A2, GPI, IDH2, CIB1, GOLPH3L, BAG4, SEC24A, SAR1B, ARFIP1, HAX1, PPID, SFN, NSUN2, NUP54, ENSA, GLMN, GOLPH3, BAD, CDKN2A, IRF3, SP100, ZPR1, HSP90AB1, CDK5, XPO5, CDK1, GAPDH, GLUL, PDCD5, JUP, CD38, YWHAZ, SLC25A5, MAVS, LEPRE1, GNB2L1, AKAP8L, ERP29, LYN, DNAJC1, ATAD1, VSNL1…	79	2.44e-05	0.00096	0.301773
GO:0051656	GO:0051656	Establishment of organelle localization	ENR	GO:0051656	BICD2, SCRIB, SEC23IP, CCDC186, NUP62, ABCE1, SNAP29, NPM1, TBC1D23, SEC31A, NDE1, MX2, BLOC1S5, SNAPIN, CHMP7, BCCIP, SEC24A, CHMP4B, SAR1B, IKBKG, COPG2, GOLGA2, GBF1, USO1, C17ORF75, SEC13, F8A1, PDCD6, CDK5, BLOC1S6, YKT6, GOSR2, TFG, YWHAZ, DOCK7, TRIP11, DLG1, MAD1L1, PREB, LRPPRC, TMED2, SLC9A3R1, LYN, ARFGAP3, MX1, WDR11, SEC24D, MYO1E, EIF6, LMAN1, SEC23A, LOH12CR1, RHOT2, COPG1, AP3S1, …	66	1.68e-08	1.17e-06	0.593181
GO:0046907	GO:0046907	Intracellular transport	ENR	GO:0046907	BICD2, SCRIB, TOMM20, ERGIC2, RAB25, IPO9, COPA, RAB4A, PEX19, GOPC, SNX27, SEC63, SEC23IP, CCDC186, ERLEC1, TMED5, STX16, HOOK1, TOMM34, TAP2, VTA1, PPP1R10, AAAS, PITRM1, SLC25A6, BET1L, TMEM87A, SNX9, MON2, GOLGB1, SNRPD3, TBC1D23, SIL1, TOMM22, ADAR, TIMM9, SEC31A, RPS27, NDE1, RAB13, BLOC1S5, HOOK2, SNAPIN, CHMP7, KIAA1468, SEC24A, CHMP4B, DOPEY2, SCFD2, SAR1B, ABCD1, IPO11, REPS1, IFT27, AR…	298	9.56e-46	5.34e-43	4.22725
GO:0016236	GO:0016236	Macroautophagy	ENR	GO:0016236	SNAPIN, LAMP2, TOMM20, TOMM40, PGAM5, CHMP4B, UBQLN2, TOMM7, FAM134C, ATG5, SQSTM1, PRKAG1, VPS37C, MFN2, ATG3, VTA1, TOMM70A, UBQLN1, SNAP29, TOMM22, GBA, VPS28, VDAC1, TOMM5	24	0.0022	0.0494	0.130627
GO:0006890	GO:0006890	Retrograde vesicle-mediated transport, golgi to endoplasmic reticulum	ENR	GO:0006890	BICD2, ERGIC2, COPA, COPB1, KLC2, KDELR2, RER1, TMED2, SCYL1, COPE, ARFGAP3, ARCN1, TAPBP, GOLPH3L, TMED3, ARFGAP1, COG4, COPG2, TMED7, GBF1, COPG1, COG7, COPZ1, COPB2, TMED9, GOLPH3, COG3	27	1.14e-08	8.23e-07	0.60846
GO:0009306	GO:0009306	Protein secretion	ENR	GO:0009306	IL1RN, TLR2, SEL1L, PDIA4, CCDC186, COPG2, COMP, PREB, ERP29, COPG1, MIA3, RAB3D, LYN, RCN3, ARFGAP3, GOLPH3, M6PR, CANX, MIA2, PSAP, RAB13, UBE2Q1	22	0.001	0.0272	0.156543
GO:0006888	GO:0006888	Endoplasmic reticulum to golgi vesicle-mediated transport	ENR	GO:0006888	ERGIC2, COPA, GOPC, SEC23IP, TMED5, BET1L, GOLGB1, SEC31A, SEC24A, SAR1B, COG6, COPG2, GOLGA2, TMED7, GBF1, MIA3, COG7, USO1, COPZ1, SEC13, PDCD6, HYOU1, TMED1, YKT6, GOSR2, TFG, COPB1, KDELR2, PREB, TMED2, COPE, ARFGAP3, ARCN1, SPTBN2, MIA2, SEC24D, COG5, TMED3, LMAN1, COG8, SEC23A, ARFGAP1, COG4, COPG1, SEC16A, MCFD2, COPB2, TMED9, SEC23B, COG3	50	9.43e-12	9.39e-10	0.902733

## Sheet: CELLULAR_ORGANIZATION
GO Term	Enrichment Map Name	GS_DESCR	GS_Type	Formatted name	Genes	GS_SIZE	p-value	Enrichment FDR q-value	NES
GO:0061024	GO:0061024	Membrane organization	ENR	GO:0061024	ATP5J2, TOMM20, SEC23IP, STX16, TAP2, BET1L, SNX9, SNAP29, TAPBP, HSPA9, APOA1BP, TOMM22, TIMM9, SEC31A, RAB13, SNAPIN, CHMP7, VRK1, SEC24A, CHMP4B, PTPRC, SAR1B, ABCD1, REPS1, UBL4A, GOLGA2, SGTA, GBF1, ATP2A2, USO1, ATP5I, SYNGR2, BCL2L1, NUP155, SLC25A5, MFN2, ZMPSTE24, RER1, GLTP, LMAN1, HIP1R, LETM1, TIMM50, BAG6, BID, ATL2, BAIAP2L1, ARPC3, MTX2, ARPC1A, DNAJA3, MX2, GOLPH3L, SFN, MIA3, CAL…	102	1.58e-06	7.94e-05	0.410018
GO:0002183	GO:0002183	Cytoplasmic translational initiation	ENR	GO:0002183	DHX29, EIF4A1, EIF2S2, EIF2S3, EIF3G, EIF4G1, EIF4EBP1, EIF2B3, RBM4, EIF3J, EIF3B, EIF3F, MCTS1, EIF3K	14	6.34e-07	3.39e-05	0.44698
GO:0043933	GO:0043933	Protein-containing complex subunit organization	ENR	GO:0043933	FKBP4, TOMM20, MRPS35, PARP1, HSD17B10, EPRS, SEC23IP, DHX9, VTA1, SNX9, SNAP29, MIF, SNRPD3, HSCB, DAP3, ADAR, MCM5, SEC31A, RPS27, NDE1, SNAPIN, CHMP7, SEC24A, CHMP4B, MRPL9, SAR1B, SF3A2, SRP19, RPL5, USO1, AIMP2, RPA3, MCTS1, HSP90AB1, SRSF9, MRPS2, G3BP2, PREX1, NDUFS7, SLC1A5, SF3A3, RBBP4, SNRPC, MRPS7, NDUFA8, SRPK1, UQCC2, EIF3K, EIF6, BRIX1, CCDC53, LMAN1, HIP1R, SLAIN2, DHX29, SMARCC2,…	252	2.24e-27	4.96e-25	2.43045
GO:0071840	GO:0071840	Cellular component organization or biogenesis	ENR	GO:0071840	BICD2, FKBP4, SCRIB, RAB25, RFC2, MRPS35, PEX19, TRIP13, GOPC, HSD17B10, SEC23IP, TMED5, STX16, HOOK1, ITGB4, TOMM34, TAP2, AAAS, PITRM1, SLC25A6, BET1L, SNX9, SNAP29, MIF, GOLGB1, SNRPD3, TBC1D23, HSCB, TOMM22, TIMM9, MCM5, SEC31A, NDE1, TTLL12, BLOC1S5, HOOK2, CHMP7, VRK1, SEC24A, CHMP4B, DOPEY2, SAR1B, ABCD1, PQBP1, REPS1, TIMP1, IFT27, ARFIP1, SF3A2, TMED7, SGTA, FBL, SRP19, ATP2A2, DNASE2, U…	632	1.64e-26	3.5e-24	2.34559
GO:0042274	GO:0042274	Ribosomal small subunit biogenesis	ENR	GO:0042274	HEATR1, BYSL, RPS16, RPS10, TSR1, RPS24, RPS7, RPS21, RPS8, RPL38, RPS28, RPSA, RPS6, NAT10, NPM1, PRKDC, MRPS7, TBL3, RPS27, RRS1, NHP2L1	21	1.2e-06	6.2e-05	0.420761
GO:0022411	GO:0022411	Cellular component disassembly	ENR	GO:0022411	MRPS18B, MMP1, MRPS35, MRPL15, GADD45GIP1, GSPT1, VTA1, ABCE1, SNAP29, DAP3, SNAPIN, CHMP7, LAMP2, VRK1, BSG, MRPL12, MRPL9, TOP2A, TIMP1, ATG5, SQSTM1, GOLGA2, GBF1, MMP14, DNASE2, MRPL19, MRPL47, MRPS22, MRPL39, MRPL13, CDKN2A, MCTS1, CDK5, KPNA1, CDK1, MRRF, MRPS2, CSNK1A1, MRPS30, FAM134C, SH3PXD2B, AKAP8L, MRPS27, MRPL46, MRPL22, SHARPIN, MRPS7, MRPS5, CISD2, MRPS31, TRMT112, MRPL49, CDK5RAP…	73	1.64e-10	1.47e-08	0.783268
GO:0086042	GO:0086042	Cardiac muscle cell-cardiac muscle cell adhesion	ENR	GO:0086042	JUP, PKP2, DSG2, DSP, CXADR	5	0.00094	0.0249	0.16038
GO:0090161	GO:0090161	Golgi ribbon formation	ENR	GO:0090161	TRIP11, GCC2, GOLPH3, STX6, TMED5, GOLGA2, STX16	7	0.00031	0.0094	0.202687
GO:0007030	GO:0007030	Golgi organization	ENR	GO:0007030	CSNK1A1, YWHAZ, GOLGA5, TRIP11, SEC23IP, STX6, TMED5, STX16, GORASP2, HOOK1, ARL1, TMED2, ARFGEF1, GOLGB1, C11ORF73, NPLOC4, GOLPH3L, VRK1, TMED3, LMAN1, GCC2, COG4, GOLGA2, TMED7, GBF1, SEC16A, COG7, USO1, TMED9, GOLPH3, ATL2, TJAP1, TMED1, COG3, CDK1	35	3.51e-09	2.72e-07	0.656543
GO:0051179	GO:0051179	Localization	ENR	GO:0051179	BICD2, FKBP4, SCRIB, PSMA4, ERGIC2, RAB25, IPO9, COPA, PEX19, GOPC, SNX27, SEC63, KEAP1, SEC23IP, CCDC186, ERLEC1, TMED5, FAP, STX16, HOOK1, ITGB4, TOMM34, TAP2, PPP1R10, AAAS, PITRM1, SLC25A6, BET1L, TMEM87A, PSMD8, SNX9, SNAP29, MON2, MIF, GOLGB1, SNRPD3, TBC1D23, SIL1, TOMM22, TIMM9, SEC31A, ARSA, NDE1, BLOC1S5, HOOK2, CHMP7, KIAA1468, SEC24A, CHMP4B, DOPEY2, SCFD2, PGRMC1, SAR1B, ABCD1, IPO11…	609	4.39e-22	7.33e-20	1.91349
GO:0016050	GO:0016050	Vesicle organization	ENR	GO:0016050	SEC23IP, STX16, HOOK1, TAP2, VTA1, SNAP29, TAPBP, SEC31A, MX2, RAB13, BLOC1S5, HOOK2, GOLPH3L, SNAPIN, CHMP7, SEC24A, CHMP4B, SAR1B, SQSTM1, VPS37C, GOLGA2, GBF1, MIA3, CALR, USO1, SEC13, PDCD6, GOLPH3, BLOC1S6, GOSR2, TFG, ARFGEF2, STX6, PREB, SERPINE2, TMED2, TMF1, ARFGAP3, MX1, SEC24D, LMAN1, SEC23A, SEC16A, MCFD2, BLOC1S1, TMED9, SEC23B, VPS28, AP3D1	49	7.19e-06	0.00032	0.349485
GO:0090110	GO:0090110	COPII-coated vesicle cargo loading	ENR	GO:0090110	MIA3, SEC24A, SEC13, SEC23A, SEC23B, SEC24D, SEC31A	7	0.00031	0.0094	0.202687
GO:0061008	GO:0061008	Hepaticobiliary system development	ENR	GO:0061008	GNPNAT1, ARF6, AK4, RELA, HMGCL, HMGCS1, PCNA, RPL10, PRKCSH, SEC63, ASNS, NIPBL, AACS, ZMPSTE24, MAN2A1, PNPT1, ADA, RPL30, CAD, LSR, GFER, PKM	22	0.0013	0.0333	0.147756
GO:0022613	GO:0022613	Ribonucleoprotein complex biogenesis	ENR	GO:0022613	HEATR1, LUC7L, DHX9, ABCE1, RPF2, RPL6, NPM1, SNRPD3, ADAR, RPS27, NUDT21, SNRPD1, RPL10, TSR1, RPS24, DKC1, RPS9, SF3A2, PDCD11, FBL, CD2BP2, RPL5, EIF2A, RPL7L1, C1QBP, ISG20, CDKN2A, MCTS1, HSP90AB1, FAM103A1, SRSF9, GLUL, MRPS2, BYSL, WDR36, RPL7A, LUC7L3, RPL38, DDX23, SF3A3, MRPL22, USP39, EIF3F, SNRPC, PRKDC, PIN4, CLNS1A, MRPS7, PUF60, SRPK1, MALSU1, CELF1, PRPF3, EIF3K, CEBPZ, EIF6, BRIX…	116	9.32e-28	2.1e-25	2.46778

## Sheet: TRANSLATION
GO Term	Enrichment Map Name	GS_DESCR	GS_Type	Formatted name	Genes	GS_SIZE	p-value	Enrichment FDR q-value	NES
GO:1901607	GO:1901607	Alpha-amino acid biosynthetic process	ENR	GO:1901607	SHMT2, GLUL, PSPH, OAT, SEPHS1, APIP, PYCR1, ASNSD1, ASNS, BCAT1, PLOD2, CAD, PSAT1, PYCR2, SLC25A12, ALDH18A1, GGT1, ADI1	18	4.62e-06	0.00021	0.367778
GO:0000028	GO:0000028	Ribosomal small subunit assembly	ENR	GO:0000028	RPS10, PRKDC, MRPS7, RPL38, RPS28, RPS27, RPSA	7	0.0014	0.0345	0.146218
GO:0042273	GO:0042273	Ribosomal large subunit biogenesis	ENR	GO:0042273	RSL1D1, RPL7A, RPL14, RPL3, RPL38, RPF2, RPL6, NPM1, MALSU1, NHP2, NHP2L1, EIF6, NOP2, BRIX1, URB1, NOP16, DDX18, RPL10, MRTO4, RPL5, GTPBP4, NIFK, RPLP0, RPL24, RPL7L1, RPL12, BOP1, RRS1	28	1.87e-10	1.66e-08	0.777989
GO:0017148	GO:0017148	Negative regulation of translation	ENR	GO:0017148	GAPDH, IGF2BP3, EIF2AK2, EPRS, YBX1, EIF4E, MOV10, GNB2L1, KHSRP, CAPRIN1, FXR1, YTHDF1, IGF2BP2, TIA1, PUS7, DDX3X, TNRC6B, YTHDF2, RQCD1, MALSU1, CELF1, EIF6, RPS3, LARP1, CNOT3, HNRNPR, SRP9, SAMD4B, EIF4EBP1, HRSP12, CALR, DHX36, FMR1, RBM4, GIGYF2, MRPL13, CNOT1, CNOT7, PUM1	39	1.17e-10	1.09e-08	0.796257
GO:0006412	GO:0006412	Translation	ENR	GO:0006412	RPS18, MRPS35, EIF4A1, EPRS, GSPT1, RPL9, AARSD1, DHPS, ABCE1, RPS23, RPL6, RPL36A, DAP3, RPS27, EEF1D, EEF1A2, MRPL9, GCN1L1, TARS2, RPL10, RPS24, PAIP1, RPS9, EIF2B1, EIF4G1, RPL32, RPL5, EIF2A, RPL18A, MRPL47, MRPS22, AIMP2, MRPL39, RPL37A, MRPL13, MCTS1, GFM1, EIF1, RPL13, MRPS2, RPS12, EEF2, MRPS30, EIF2AK2, RPL15, RPL7A, EIF4E, RPL38, WARS2, GNB2L1, RPL4, PABPC4, MRPS27, RPL30, MRPL46, MRPL…	152	2.71e-54	4.35e-51	5.03615
GO:0006418	GO:0006418	tRNA aminoacylation for protein translation	ENR	GO:0006418	TARS2, GARS, NARS2, EPRS, FARSB, EEF1E1, IARS, WARS2, DARS, VARS, SARS2, AARSD1, AARS, NARS, AIMP2, YARS, TARS, AARS2, FARSA, LARS, YARS2, AIMP1, DARS2	23	1.66e-10	1.48e-08	0.782974
GO:0002183	GO:0002183	Cytoplasmic translational initiation	ENR	GO:0002183	DHX29, EIF4A1, EIF2S2, EIF2S3, EIF3G, EIF4G1, EIF4EBP1, EIF2B3, RBM4, EIF3J, EIF3B, EIF3F, MCTS1, EIF3K	14	6.34e-07	3.39e-05	0.44698
GO:0045727	GO:0045727	Positive regulation of translation	ENR	GO:0045727	EEF2, DHX9, MRPS27, DNAJC3, RPL30, LARP4, TRMT10C, FXR1, YTHDF1, NPM1, PABPC1, PRKDC, RPS4X, DDX3X, POLR2D, YTHDF2, CNBP, UQCC2, LARP4B, EIF6, LARP1, DHX29, EIF2S3, PAIP1, RPS9, EIF4G1, WIBG, DHX36, RPL5, FMR1, NAT10, C1QBP	32	1.29e-07	7.78e-06	0.510902
GO:0000470	GO:0000470	Maturation of lsu-rrna	ENR	GO:0000470	EIF6, NOP2, RSL1D1, URB1, DDX18, RPL7A, GTPBP4, NIFK, RPF2, RPL7L1, BOP1, NHP2, NHP2L1	13	3.02e-06	0.00014	0.385387
GO:0042255	GO:0042255	Ribosome assembly	ENR	GO:0042255	MRPS2_x000D_RPL3_x000D_RPL38_x000D_RPS28_x000D_RPSA_x000D_RPF2_x000D_RPL6_x000D_MRPL22_x000D_NPM1_x000D_PRKDC_x000D_MRPS7_x000D_DDX3X_x000D_RPS27_x000D_EIF6_x000D_NOP2_x000D_BRIX1_x000D_DHX29_x000D_RPS10_x000D_RPL10_x000D_MRTO4_x000D_RPL5_x000D_EIF2A_x000D_RPLP0_x000D_RPL24_x000D_C1QBP_x000D_RPL12_x000D_BOP1_x000D_RRS1	28	8.57e-12	8.6e-10	0.90655
GO:0042274	GO:0042274	Ribosomal small subunit biogenesis	ENR	GO:0042274	HEATR1_x000D_BYSL_x000D_RPS16_x000D_RPS10_x000D_TSR1_x000D_RPS24_x000D_RPS7_x000D_RPS21_x000D_RPS8_x000D_RPL38_x000D_RPS28_x000D_RPSA_x000D_RPS6_x000D_NAT10_x000D_NPM1_x000D_PRKDC_x000D_MRPS7_x000D_TBL3_x000D_RPS27_x000D_RRS1_x000D_NHP2L1	21	1.2e-06	6.2e-05	0.420761
GO:0006413	GO:0006413	Translational initiation	ENR	GO:0006413	RPLP2, RPS18, EIF4A1, RPL27, RPS28, RPL9, RPS6, ABCE1, EIF3J, RPS23, RPL6, RPL36A, RPS27, RPL8, LARP1, RPS10, RPL10, RPS24, RPS7, PAIP1, RPS9, EIF2B1, EIF4G1, EIF4EBP1, RPL32, RPL5, EIF2A, RPL18A, RPS2, RPL24, RPL37A, MCTS1, EIF1, RPL13, EIF2B2, RPS12, RPL15, RPL7A, RPL14, EIF4E, RPS21, RPL3, RPS8, RPL38, RPL27A, RPL21, RPLP1, RPL4, RPSA, RPL22, RPL30, RPS11, PABPC1, EIF3F, RPS4X, DDX3X, RPS25, E…	74	8.34e-32	2.23e-29	2.86517
GO:0006446	GO:0006446	Regulation of translational initiation	ENR	GO:0006446	EIF2B2, LARP1, HSPB1, EIF2AK2, DHX29, NCBP1, PAIP1, EIF2B1, EIF4G1, EIF4EBP1, DNAJC3, FMR1, RBM4, EIF3B, YTHDF1, NPM1, EIF5B, EIF4B, DDX3X, POLR2D, YTHDF2, EIF1, EIF3K	23	2.74e-07	1.59e-05	0.47986
GO:0002181	GO:0002181	Cytoplasmic translation	ENR	GO:0002181	EIF4A1, RPL15, GSPT1, RPS21, RPL38, RPS28, RPL9, RPLP1, RPSA, RPL22, RPL30, EIF3J, RPS23, RPL6, DRG1, RPL36A, EIF3F, EIF3K, RPL8, DHX29, EIF2S2, ZC3H15, EIF2S3, EIF3G, EIF4G1, EIF4EBP1, RPL32, EIF2B3, ETF1, RPL18, RPL18A, RBM4, RPLP0, EIF3B, RPL24, MCTS1	36	1.19e-15	1.5e-13	1.28239
GO:0006450	GO:0006450	Regulation of translational fidelity	ENR	GO:0006450	AARS_x000D_TARS2_x000D_AARS2_x000D_EIF2S3_x000D_LARS_x000D_RPS9_x000D_IARS_x000D_VARS_x000D_AARSD1	9	0.00017	0.0054	0.226761
GO:0022613	GO:0022613	Ribonucleoprotein complex biogenesis	ENR	GO:0022613	HEATR1, LUC7L, DHX9, ABCE1, RPF2, RPL6, NPM1, SNRPD3, ADAR, RPS27, NUDT21, SNRPD1, RPL10, TSR1, RPS24, DKC1, RPS9, SF3A2, PDCD11, FBL, CD2BP2, RPL5, EIF2A, RPL7L1, C1QBP, ISG20, CDKN2A, MCTS1, HSP90AB1, FAM103A1, SRSF9, GLUL, MRPS2, BYSL, WDR36, RPL7A, LUC7L3, RPL38, DDX23, SF3A3, MRPL22, USP39, EIF3F, SNRPC, PRKDC, PIN4, CLNS1A, MRPS7, PUF60, SRPK1, MALSU1, CELF1, PRPF3, EIF3K, CEBPZ, EIF6, BRIX…	116	9.32e-28	2.1e-25	2.46778

[truncated: 3 more sheets: REPLICATIONandTRANSCRIPTION, IMMUNE_RESPONSE, REGULATIONofBP]
